# Supplementary material for: Threatened Reef Corals of the World
Source: PubMed Central journal article supplement (PMC3316686; doi:10.1371/journal.pone.0034459), 2012-03-30
Supplement: pone.0034459.s001.pdf [file pone.0034459.s001.pdf]

# Threatened Reef Corals of the World

*Danwei Huang*

**Table S1.** Reef and non-reef coral species included in the phylogenetic analysis of Scleractinia.

| Family      | Species                           | Reef | Red List | EoE rank | EDGE rank (IUCN100) | EDGE rank (Isaac) | EDGE rank (Pessimistic) | Molecular sources                                                                     | Morphological sources | Remarks                                     |
|-------------|-----------------------------------|------|----------|----------|---------------------|-------------------|-------------------------|---------------------------------------------------------------------------------------|-----------------------|---------------------------------------------|
| Acroporidae | <i>Acropora abrolhosensis</i>     | Yes  | VU       | N/A      | 157                 | 310               | 309                     | ND5: EU533959                                                                         | [69]                  |                                             |
| Acroporidae | <i>Acropora abrotanoides</i>      | Yes  | LC       | N/A      | 793                 | 725               | 725                     | CTR: FJ899068                                                                         | [69]                  |                                             |
| Acroporidae | <i>Acropora aculeus</i>           | Yes  | VU       | N/A      | 189                 | 427               | 419                     |                                                                                       | [69]                  |                                             |
| Acroporidae | <i>Acropora acuminata</i>         | Yes  | VU       | N/A      | 234                 | 527               | 527                     | ND5: EU533969                                                                         | [69]                  |                                             |
| Acroporidae | <i>Acropora akajimensis</i>       | Yes  | DD       | N/A      | 459                 | 553               | 553                     |                                                                                       | [69]                  | Junior synonym of <i>A. donei</i> [69]      |
| Acroporidae | <i>Acropora anthocercis</i>       | Yes  | VU       | N/A      | 231                 | 523               | 523                     | ND5: EU533970                                                                         | [69]                  |                                             |
| Acroporidae | <i>Acropora appressa</i>          | Yes  | NT       | N/A      | 528                 | 723               | 723                     |                                                                                       | [69]                  |                                             |
| Acroporidae | <i>Acropora arabensis</i>         | Yes  | NT       | N/A      | 449                 | 606               | 606                     |                                                                                       | [69]                  | Sister species to <i>A. valida</i> [69]     |
| Acroporidae | <i>Acropora aspera</i>            | Yes  | VU       | N/A      | 82                  | 116               | 107                     | CTR: EU918267;<br>CYB: FJ391987                                                       | [69]                  |                                             |
| Acroporidae | <i>Acropora austera</i>           | Yes  | NT       | N/A      | 266                 | 158               | 147                     | CTR: EU918228;<br>CYB: FJ391989                                                       | [69]                  |                                             |
| Acroporidae | <i>Acropora avi</i>               | Yes  | VU       | N/A      | 256                 | 567               | 567                     |                                                                                       | [69]                  |                                             |
| Acroporidae | <i>Acropora batunai</i>           | Yes  | VU       | N/A      | 85                  | 134               | 123                     | CTR: EU918250;<br>ND5: EU533971                                                       | [69]                  |                                             |
| Acroporidae | <i>Acropora bifurcata</i>         | Yes  | DD       | N/A      | 579                 | 726               | 726                     |                                                                                       | [69]                  | Junior synonym of <i>A. hyacinthus</i> [69] |
| Acroporidae | <i>Acropora branchi</i>           | Yes  | DD       | N/A      | 622                 | 762               | 762                     |                                                                                       | [69]                  |                                             |
| Acroporidae | <i>Acropora bushyensis</i>        | Yes  | LC       | N/A      | 788                 | 708               | 708                     | ND5: EU533975                                                                         | [69]                  |                                             |
| Acroporidae | <i>Acropora cardenae</i>          | Yes  | DD       | N/A      | 467                 | 582               | 582                     |                                                                                       | [69]                  |                                             |
| Acroporidae | <i>Acropora carduus</i>           | Yes  | NT       | N/A      | 416                 | 531               | 531                     | ND5: EU533976                                                                         | [69]                  |                                             |
| Acroporidae | <i>Acropora caroliniana</i>       | Yes  | VU       | N/A      | 61                  | 74                | 69                      | CTR: EU918274                                                                         | [69]                  |                                             |
| Acroporidae | <i>Acropora cerealis</i>          | Yes  | LC       | N/A      | 796                 | 729               | 729                     | CTR: EU918248;<br>CYB: AF099652;<br>ND5: EU533979                                     | [69]                  |                                             |
| Acroporidae | <i>Acropora cervicornis</i>       | Yes  | CR       | 13       | 9                   | 28                | 174                     | 12S: EF597094;<br>COI: AY451340;<br>CTR: EU918257;<br>CYB: AF099654;<br>ND5: EU533960 | [69]                  |                                             |
| Acroporidae | <i>Acropora chesterfieldensis</i> | Yes  | LC       | N/A      | 602                 | 428               | 420                     | CTR: EU918262;<br>ND5: EU533981                                                       | [69]                  |                                             |
| Acroporidae | <i>Acropora clathrata</i>         | Yes  | LC       | N/A      | 819                 | 816               | 816                     |                                                                                       | [69]                  |                                             |
| Acroporidae | <i>Acropora convexa</i>           | Yes  | DD       | N/A      | 622                 | 762               | 762                     |                                                                                       | [69]                  | Junior synonym of <i>A. millepora</i> [69]  |
| Acroporidae | <i>Acropora cophodactyla</i>      | Yes  | DD       | N/A      | 601                 | 749               | 749                     |                                                                                       | [69]                  | Junior synonym of <i>A. humilis</i> [69]    |
| Acroporidae | <i>Acropora copiosa</i>           | Yes  | DD       | N/A      | 622                 | 762               | 762                     |                                                                                       | [69]                  | Junior synonym of <i>A. muricata</i> [69]   |
| Acroporidae | <i>Acropora cytherea</i>          | Yes  | LC       | N/A      | 711                 | 584               | 584                     | 12S: AF333054;<br>16S: L75995;<br>CTR: AY083876;<br>CYB: FJ391995                     | [69]                  |                                             |
| Acroporidae | <i>Acropora dendrum</i>           | Yes  | VU       | N/A      | 230                 | 522               | 522                     | ND5: EU533983                                                                         | [69]                  | Sister species to <i>A. loisetteae</i> [69] |
| Acroporidae | <i>Acropora derawanensis</i>      | Yes  | VU       | N/A      | 35                  | 31                | 25                      | CTR: EU918263;<br>ND5: EU533984                                                       | [69]                  |                                             |
| Acroporidae | <i>Acropora desalwii</i>          | Yes  | VU       | N/A      | 153                 | 292               | 291                     |                                                                                       | [69]                  |                                             |
| Acroporidae | <i>Acropora digitifera</i>        | Yes  | NT       | N/A      | 335                 | 363               | 355                     | 12S: AF333051;<br>AT6: AB033199;<br>CTR: EU918261;<br>CYB: AB033184                   | [69]                  |                                             |
| Acroporidae | <i>Acropora divaricata</i>        | Yes  | NT       | N/A      | 377                 | 440               | 432                     | CTR: AY026432;<br>ND5: EU533985                                                       | [69]                  |                                             |
| Acroporidae | <i>Acropora donei</i>             | Yes  | VU       | N/A      | 77                  | 96                | 90                      | AT6: AB033195;<br>CYB: AB033180                                                       | [69]                  |                                             |
| Acroporidae | <i>Acropora downingi</i>          | Yes  | LC       | N/A      | 746                 | 637               | 637                     |                                                                                       | [69]                  | Sister species to <i>A. polystoma</i> [69]  |
| Acroporidae | <i>Acropora echinata</i>          | Yes  | VU       | N/A      | 39                  | 39                | 34                      | CYB: FJ391985;<br>ND5: EU533986                                                       | [69]                  |                                             |
| Acroporidae | <i>Acropora efflorescens</i>      | Yes  | DD       | N/A      | 595                 | 739               | 739                     |                                                                                       | [69]                  | Junior synonym of <i>A. cytherea</i> [69]   |
| Acroporidae | <i>Acropora elegans</i>           | Yes  | VU       | N/A      | 232                 | 524               | 524                     | ND5: EU533990                                                                         | [69]                  |                                             |
| Acroporidae | <i>Acropora elegantula</i>        | Yes  | DD       | N/A      | 622                 | 762               | 762                     |                                                                                       | [69]                  |                                             |
| Acroporidae | <i>Acropora elseyi</i>            | Yes  | LC       | N/A      | 766                 | 669               | 669                     | ND5: EU533991                                                                         | [69]                  |                                             |
| Acroporidae | <i>Acropora exquisita</i>         | Yes  | DD       | N/A      | 622                 | 762               | 762                     |                                                                                       | [69]                  |                                             |
| Acroporidae | <i>Acropora fastigata</i>         | Yes  | DD       | N/A      | 622                 | 762               | 762                     |                                                                                       | [69]                  |                                             |
| Acroporidae | <i>Acropora fenneri</i>           | Yes  | DD       | N/A      | 622                 | 762               | 762                     |                                                                                       | [69]                  |                                             |
| Acroporidae | <i>Acropora filiformis</i>        | Yes  | DD       | N/A      | 622                 | 762               | 762                     |                                                                                       | [69]                  |                                             |
| Acroporidae | <i>Acropora florida</i>           | Yes  | NT       | N/A      | 440                 | 599               | 599                     | AT6: AB033197;<br>CTR: AY026435;<br>CYB: AB033182;<br>ND5: EU533993                   | [69]                  |                                             |
| Acroporidae | <i>Acropora forskali</i>          | Yes  | DD       | N/A      | 622                 | 762               | 762                     |                                                                                       | [69]                  |                                             |
| Acroporidae | <i>Acropora gemmifera</i>         | Yes  | LC       | N/A      | 786                 | 705               | 705                     | AT6: AB033198;<br>CTR: EU918277;<br>CYB: AB033183                                     | [69]                  |                                             |

| Family      | Species                       | Reef | Red List | EoE rank | EDGE rank (IUCN100) | EDGE rank (Isaac) | EDGE rank (Pessimistic) | Molecular sources                                                                     | Morphological sources | Remarks                                        |
|-------------|-------------------------------|------|----------|----------|---------------------|-------------------|-------------------------|---------------------------------------------------------------------------------------|-----------------------|------------------------------------------------|
| Acroporidae | <i>Acropora glauca</i>        | Yes  | NT       | N/A      | 528                 | 723               | 723                     |                                                                                       | [69]                  |                                                |
| Acroporidae | <i>Acropora globiceps</i>     | Yes  | VU       | N/A      | 190                 | 429               | 421                     | CTR: EF206433                                                                         | [69]                  | Sister species to <i>A. humilis</i> [69]       |
| Acroporidae | <i>Acropora gomezi</i>        | Yes  | DD       | N/A      | 622                 | 762               | 762                     |                                                                                       | [69]                  |                                                |
| Acroporidae | <i>Acropora grandis</i>       | Yes  | LC       | N/A      | 809                 | 804               | 804                     | ND5: EU533994                                                                         | [69]                  |                                                |
| Acroporidae | <i>Acropora granulosa</i>     | Yes  | NT       | N/A      | 416                 | 531               | 531                     | ND5: EU533995                                                                         | [69]                  |                                                |
| Acroporidae | <i>Acropora haimeii</i>       | Yes  | DD       | N/A      | 622                 | 762               | 762                     |                                                                                       | [69]                  |                                                |
| Acroporidae | <i>Acropora halmaherae</i>    | Yes  | DD       | N/A      | 622                 | 762               | 762                     |                                                                                       | [69]                  |                                                |
| Acroporidae | <i>Acropora hemprichii</i>    | Yes  | VU       | N/A      | 80                  | 101               | 94                      | 16S: AF550359                                                                         | [69]                  | Sister species to <i>A. austera</i> [69]       |
| Acroporidae | <i>Acropora hoeksemai</i>     | Yes  | VU       | N/A      | 236                 | 534               | 534                     |                                                                                       | [69]                  |                                                |
| Acroporidae | <i>Acropora horrida</i>       | Yes  | VU       | N/A      | 99                  | 169               | 161                     | ND5: EU533998                                                                         | [69]                  |                                                |
| Acroporidae | <i>Acropora humilis</i>       | Yes  | NT       | N/A      | 437                 | 586               | 586                     | 16S: L75996;<br>CTR: EU918282;<br>CYB: EF363316                                       | [69]                  |                                                |
| Acroporidae | <i>Acropora hyacinthus</i>    | Yes  | NT       | N/A      | 396                 | 479               | 473                     | 12S: AF333053;<br>CTR: AY083877;<br>CYB: FJ391988;<br>ND5: EU534002                   | [69]                  |                                                |
| Acroporidae | <i>Acropora indonesia</i>     | Yes  | VU       | N/A      | 228                 | 514               | 514                     | ND5: EU534003                                                                         | [69]                  |                                                |
| Acroporidae | <i>Acropora inermis</i>       | Yes  | DD       | N/A      | 622                 | 762               | 762                     |                                                                                       | [69]                  | Junior synonym of <i>A. horrida</i> [69]       |
| Acroporidae | <i>Acropora insignis</i>      | Yes  | DD       | N/A      | 622                 | 762               | 762                     |                                                                                       | [69]                  |                                                |
| Acroporidae | <i>Acropora intermedia</i>    | Yes  | LC       | N/A      | 685                 | 533               | 533                     | CTR: AY026451;<br>ND5: EU533965                                                       | [69]                  | Senior synonym of <i>A. nobilis</i> [69]       |
| Acroporidae | <i>Acropora irregularis</i>   | Yes  | DD       | N/A      | 553                 | 682               | 682                     |                                                                                       | [69]                  | Junior synonym of <i>A. abrotanoides</i> [69]  |
| Acroporidae | <i>Acropora jacquelineae</i>  | Yes  | VU       | N/A      | 119                 | 210               | 204                     | CTR: EU918284;<br>ND5: EU534012                                                       | [69]                  |                                                |
| Acroporidae | <i>Acropora japonica</i>      | Yes  | DD       | N/A      | 622                 | 762               | 762                     |                                                                                       | [69]                  |                                                |
| Acroporidae | <i>Acropora khayranensis</i>  | Yes  | DD       | N/A      | 622                 | 762               | 762                     |                                                                                       | [69]                  |                                                |
| Acroporidae | <i>Acropora kimbeensis</i>    | Yes  | VU       | N/A      | 113                 | 191               | 183                     | CTR: EU918214                                                                         | [69]                  |                                                |
| Acroporidae | <i>Acropora kiristyaee</i>    | Yes  | VU       | N/A      | 164                 | 332               | 330                     | CTR: EU918215;<br>ND5: EU534015                                                       | [69]                  |                                                |
| Acroporidae | <i>Acropora kosurini</i>      | Yes  | VU       | N/A      | 236                 | 534               | 534                     |                                                                                       | [69]                  |                                                |
| Acroporidae | <i>Acropora lamarcki</i>      | Yes  | DD       | N/A      | 622                 | 762               | 762                     |                                                                                       | [69]                  |                                                |
| Acroporidae | <i>Acropora latistella</i>    | Yes  | LC       | N/A      | 610                 | 436               | 428                     | CTR: AY026443;<br>CYB: AF099656                                                       | [69]                  |                                                |
| Acroporidae | <i>Acropora lianae</i>        | Yes  | DD       | N/A      | 622                 | 762               | 762                     |                                                                                       | [69]                  |                                                |
| Acroporidae | <i>Acropora listeri</i>       | Yes  | VU       | N/A      | 192                 | 439               | 431                     | ND5: EU533966                                                                         | [69]                  |                                                |
| Acroporidae | <i>Acropora loisetteae</i>    | Yes  | VU       | N/A      | 114                 | 202               | 195                     | CTR: EU918222                                                                         | [69]                  |                                                |
| Acroporidae | <i>Acropora lokani</i>        | Yes  | VU       | N/A      | 109                 | 183               | 175                     | CTR: EU918270                                                                         | [69]                  |                                                |
| Acroporidae | <i>Acropora longicyathus</i>  | Yes  | LC       | N/A      | 808                 | 803               | 803                     | CTR: EU918220;<br>ND5: EU534017                                                       | [69]                  |                                                |
| Acroporidae | <i>Acropora loripes</i>       | Yes  | NT       | N/A      | 401                 | 510               | 507                     | CTR: EU918227;<br>ND5: EU534020                                                       | [69]                  |                                                |
| Acroporidae | <i>Acropora lovelli</i>       | Yes  | VU       | N/A      | 259                 | 570               | 570                     |                                                                                       | [69]                  |                                                |
| Acroporidae | <i>Acropora lutkeni</i>       | Yes  | NT       | N/A      | 378                 | 449               | 441                     | ND5: EU534023                                                                         | [69]                  |                                                |
| Acroporidae | <i>Acropora macrostoma</i>    | Yes  | DD       | N/A      | 622                 | 762               | 762                     |                                                                                       | [69]                  | Junior synonym of <i>A. tenuis</i> [69]        |
| Acroporidae | <i>Acropora maryae</i>        | Yes  | DD       | N/A      | 622                 | 762               | 762                     |                                                                                       | [69]                  |                                                |
| Acroporidae | <i>Acropora massawensis</i>   | Yes  | DD       | N/A      | 569                 | 709               | 709                     |                                                                                       | [69]                  | Junior synonym of <i>A. polystoma</i> [69]     |
| Acroporidae | <i>Acropora microclados</i>   | Yes  | VU       | N/A      | 137                 | 237               | 234                     | ND5: EU534024                                                                         | [69]                  |                                                |
| Acroporidae | <i>Acropora microphthalma</i> | Yes  | LC       | N/A      | 759                 | 653               | 653                     | CTR: EU918203;<br>CYB: FJ391986;<br>ND5: EU534026                                     | [69]                  |                                                |
| Acroporidae | <i>Acropora millepora</i>     | Yes  | NT       | N/A      | 477                 | 656               | 656                     | CTR: EU918207;<br>CYB: AF099653;<br>ND5: EU534029                                     | [69]                  |                                                |
| Acroporidae | <i>Acropora minuta</i>        | Yes  | DD       | N/A      | 622                 | 762               | 762                     |                                                                                       | [69]                  |                                                |
| Acroporidae | <i>Acropora mirabilis</i>     | Yes  | DD       | N/A      | 622                 | 762               | 762                     |                                                                                       | [69]                  |                                                |
| Acroporidae | <i>Acropora monticulosa</i>   | Yes  | NT       | N/A      | 438                 | 588               | 588                     | CTR: EF206487                                                                         | [69]                  |                                                |
| Acroporidae | <i>Acropora multiacuta</i>    | Yes  | VU       | N/A      | 195                 | 446               | 438                     | CTR: EF206546                                                                         | [69]                  |                                                |
| Acroporidae | <i>Acropora muricata</i>      | Yes  | NT       | N/A      | 402                 | 511               | 508                     | 12S: AF177042;<br>CYB: AF099651                                                       | [69]                  | Type species of <i>Acropora</i> [69]           |
| Acroporidae | <i>Acropora nana</i>          | Yes  | NT       | N/A      | 393                 | 473               | 467                     | ND5: EU534031                                                                         | [69]                  |                                                |
| Acroporidae | <i>Acropora nasuta</i>        | Yes  | NT       | N/A      | 466                 | 650               | 650                     | AT6: AB033200;<br>CTR: EU918229;<br>CYB: AB033185;<br>ND5: EU534032                   | [69]                  |                                                |
| Acroporidae | <i>Acropora natalensis</i>    | Yes  | DD       | N/A      | 598                 | 741               | 741                     |                                                                                       | [69]                  | Junior synonym of <i>A. solitaryensis</i> [69] |
| Acroporidae | <i>Acropora navini</i>        | Yes  | DD       | N/A      | 622                 | 762               | 762                     |                                                                                       | [69]                  |                                                |
| Acroporidae | <i>Acropora ocellata</i>      | Yes  | DD       | N/A      | 552                 | 670               | 670                     |                                                                                       | [69]                  | Senior synonym of <i>A. lutkeni</i> [69]       |
| Acroporidae | <i>Acropora orbicularis</i>   | Yes  | DD       | N/A      | 599                 | 742               | 742                     |                                                                                       | [69]                  | Junior synonym of <i>A. clathrata</i> [69]     |
| Acroporidae | <i>Acropora pagoensis</i>     | Yes  | DD       | N/A      | 622                 | 762               | 762                     |                                                                                       | [69]                  |                                                |
| Acroporidae | <i>Acropora palmata</i>       | Yes  | CR       | 10       | 8                   | 21                | 150                     | 12S: EF597092;<br>COI: AB441246;<br>CTR: AF507217;<br>CYB: AB441331;<br>ND5: EU533962 | [69]                  |                                                |
| Acroporidae | <i>Acropora palmerae</i>      | Yes  | VU       | N/A      | 188                 | 423               | 415                     |                                                                                       | [69]                  |                                                |
| Acroporidae | <i>Acropora paniculata</i>    | Yes  | VU       | N/A      | 229                 | 518               | 518                     |                                                                                       | [69]                  |                                                |
| Acroporidae | <i>Acropora papillare</i>     | Yes  | VU       | N/A      | 32                  | 27                | 20                      | CTR: EU918211                                                                         | [69]                  |                                                |
| Acroporidae | <i>Acropora paragemmifera</i> | Yes  | DD       | N/A      | 622                 | 762               | 762                     |                                                                                       | [69]                  |                                                |

| Family      | Species                         | Reef | Red List | EoE rank | EDGE rank (IUCN100) | EDGE rank (Isaac) | EDGE rank (Pessimistic) | Molecular sources                                                                                                         | Morphological sources | Remarks                                       |
|-------------|---------------------------------|------|----------|----------|---------------------|-------------------|-------------------------|---------------------------------------------------------------------------------------------------------------------------|-----------------------|-----------------------------------------------|
| Acroporidae | <i>Acropora parahemprichii</i>  | Yes  | DD       | N/A      | 622                 | 762               | 762                     |                                                                                                                           | [69]                  |                                               |
| Acroporidae | <i>Acropora parapharaonis</i>   | Yes  | DD       | N/A      | 622                 | 762               | 762                     |                                                                                                                           | [69]                  |                                               |
| Acroporidae | <i>Acropora parilis</i>         | Yes  | DD       | N/A      | 622                 | 762               | 762                     |                                                                                                                           | [69]                  | Junior synonym of <i>A. horrida</i> [69]      |
| Acroporidae | <i>Acropora pectinatus</i>      | Yes  | DD       | N/A      | 622                 | 762               | 762                     |                                                                                                                           | [69]                  |                                               |
| Acroporidae | <i>Acropora pharaonis</i>       | Yes  | VU       | N/A      | 259                 | 570               | 570                     |                                                                                                                           | [69]                  |                                               |
| Acroporidae | <i>Acropora pichoni</i>         | Yes  | NT       | N/A      | 322                 | 325               | 323                     | CTR: EU918206;<br>ND5: EU534033                                                                                           | [69]                  | Sister species to <i>A. elegans</i> [69]      |
| Acroporidae | <i>Acropora pinguis</i>         | Yes  | DD       | N/A      | 553                 | 682               | 682                     |                                                                                                                           | [69]                  | Junior synonym of <i>A. robusta</i> [69]      |
| Acroporidae | <i>Acropora plana</i>           | Yes  | DD       | N/A      | 622                 | 762               | 762                     |                                                                                                                           | [69]                  | Junior synonym of <i>A. tenuis</i> [69]       |
| Acroporidae | <i>Acropora plantaginea</i>     | Yes  | DD       | N/A      | 622                 | 762               | 762                     |                                                                                                                           | [69]                  |                                               |
| Acroporidae | <i>Acropora plumosa</i>         | Yes  | VU       | N/A      | 259                 | 570               | 570                     |                                                                                                                           | [69]                  |                                               |
| Acroporidae | <i>Acropora polystoma</i>       | Yes  | VU       | N/A      | 87                  | 138               | 128                     | ND5: EU533964                                                                                                             | [69]                  |                                               |
| Acroporidae | <i>Acropora prostrata</i>       | Yes  | DD       | N/A      | 622                 | 762               | 762                     |                                                                                                                           | [69]                  | Junior synonym of <i>A. millepora</i> [69]    |
| Acroporidae | <i>Acropora proximalis</i>      | Yes  | DD       | N/A      | 622                 | 762               | 762                     |                                                                                                                           | [69]                  |                                               |
| Acroporidae | <i>Acropora pruinosa</i>        | Yes  | DD       | N/A      | 622                 | 762               | 762                     |                                                                                                                           | [69]                  |                                               |
| Acroporidae | <i>Acropora pulchra</i>         | Yes  | LC       | N/A      | 760                 | 654               | 654                     | CTR: EU918230;<br>ND5: EU533967                                                                                           | [69]                  |                                               |
| Acroporidae | <i>Acropora rambleri</i>        | Yes  | DD       | N/A      | 596                 | 740               | 740                     |                                                                                                                           | [69]                  | Junior synonym of <i>A. speciosa</i> [69]     |
| Acroporidae | <i>Acropora retusa</i>          | Yes  | VU       | N/A      | 147                 | 280               | 278                     | CTR: EF206535                                                                                                             | [69]                  |                                               |
| Acroporidae | <i>Acropora ridzwani</i>        | Yes  | DD       | N/A      | 622                 | 762               | 762                     |                                                                                                                           | [69]                  |                                               |
| Acroporidae | <i>Acropora robusta</i>         | Yes  | LC       | N/A      | 789                 | 718               | 718                     | CTR: FJ899064                                                                                                             | [69]                  |                                               |
| Acroporidae | <i>Acropora rongelapensis</i>   | Yes  | DD       | N/A      | 422                 | 447               | 439                     | CTR: EU918210                                                                                                             | [69]                  |                                               |
| Acroporidae | <i>Acropora rosaria</i>         | Yes  | DD       | N/A      | 622                 | 762               | 762                     |                                                                                                                           | [69]                  |                                               |
| Acroporidae | <i>Acropora roseni</i>          | Yes  | EN       | N/A      | 69                  | 360               | 511                     |                                                                                                                           | [69]                  |                                               |
| Acroporidae | <i>Acropora rudis</i>           | Yes  | EN       | N/A      | 69                  | 360               | 511                     |                                                                                                                           | [69]                  |                                               |
| Acroporidae | <i>Acropora rufus</i>           | Yes  | DD       | N/A      | 622                 | 762               | 762                     |                                                                                                                           | [69]                  |                                               |
| Acroporidae | <i>Acropora russelli</i>        | Yes  | VU       | N/A      | 153                 | 292               | 291                     |                                                                                                                           | [69]                  |                                               |
| Acroporidae | <i>Acropora samoensis</i>       | Yes  | LC       | N/A      | 762                 | 658               | 658                     | CTR: AY364095;<br>CYB: FJ391994                                                                                           | [69]                  |                                               |
| Acroporidae | <i>Acropora sarmentosa</i>      | Yes  | LC       | N/A      | 797                 | 737               | 737                     | CTR: AY026455;<br>ND5: EU534034                                                                                           | [69]                  |                                               |
| Acroporidae | <i>Acropora scherzeriana</i>    | Yes  | DD       | N/A      | 567                 | 706               | 706                     |                                                                                                                           | [69]                  | Junior synonym of <i>A. gemmifera</i> [69]    |
| Acroporidae | <i>Acropora schmitti</i>        | Yes  | DD       | N/A      | 512                 | 636               | 636                     |                                                                                                                           | [69]                  | Junior synonym of <i>A. digitifera</i> [69]   |
| Acroporidae | <i>Acropora secale</i>          | Yes  | NT       | N/A      | 479                 | 660               | 660                     |                                                                                                                           | [69]                  |                                               |
| Acroporidae | <i>Acropora sekiseiensis</i>    | Yes  | DD       | N/A      | 622                 | 762               | 762                     |                                                                                                                           | [69]                  | Junior synonym of <i>A. horrida</i> [69]      |
| Acroporidae | <i>Acropora selago</i>          | Yes  | NT       | N/A      | 477                 | 656               | 656                     | CTR: AB361179;<br>ND5: EU534035                                                                                           | [69]                  |                                               |
| Acroporidae | <i>Acropora seriata</i>         | Yes  | DD       | N/A      | 622                 | 762               | 762                     |                                                                                                                           | [69]                  |                                               |
| Acroporidae | <i>Acropora simplex</i>         | Yes  | VU       | N/A      | 194                 | 442               | 434                     |                                                                                                                           | [69]                  |                                               |
| Acroporidae | <i>Acropora solitaryensis</i>   | Yes  | VU       | N/A      | 233                 | 525               | 525                     | ND5: EU534039                                                                                                             | [69]                  |                                               |
| Acroporidae | <i>Acropora spatulata</i>       | Yes  | LC       | N/A      | 798                 | 738               | 738                     | CTR: EU918209;<br>ND5: EU534040                                                                                           | [69]                  |                                               |
| Acroporidae | <i>Acropora speciosa</i>        | Yes  | VU       | N/A      | 37                  | 35                | 29                      | CTR: EU918245                                                                                                             | [69]                  |                                               |
| Acroporidae | <i>Acropora spicifera</i>       | Yes  | VU       | N/A      | 175                 | 398               | 390                     | CTR: AY083881;<br>ND5: EU534041                                                                                           | [69]                  |                                               |
| Acroporidae | <i>Acropora squarrosa</i>       | Yes  | LC       | N/A      | 767                 | 685               | 685                     |                                                                                                                           | [69]                  | Sister species to <i>A. loripes</i> [69]      |
| Acroporidae | <i>Acropora stoddarti</i>       | Yes  | DD       | N/A      | 603                 | 753               | 753                     |                                                                                                                           | [69]                  | Junior synonym of <i>A. divaricata</i> [69]   |
| Acroporidae | <i>Acropora striata</i>         | Yes  | VU       | N/A      | 259                 | 570               | 570                     |                                                                                                                           | [69]                  |                                               |
| Acroporidae | <i>Acropora subglabra</i>       | Yes  | LC       | N/A      | 834                 | 833               | 833                     | ND5: EU534042                                                                                                             | [69]                  |                                               |
| Acroporidae | <i>Acropora subulata</i>        | Yes  | LC       | N/A      | 763                 | 659               | 659                     |                                                                                                                           | [69]                  |                                               |
| Acroporidae | <i>Acropora suharsonoi</i>      | Yes  | EN       | N/A      | 68                  | 359               | 510                     |                                                                                                                           | [69]                  |                                               |
| Acroporidae | <i>Acropora sukarnoi</i>        | Yes  | DD       | N/A      | 471                 | 587               | 587                     |                                                                                                                           | [69]                  |                                               |
| Acroporidae | <i>Acropora tanegashimensis</i> | Yes  | DD       | N/A      | 564                 | 686               | 686                     |                                                                                                                           | [69]                  | Sister species to <i>A. hyacinthus</i> [69]   |
| Acroporidae | <i>Acropora tenella</i>         | Yes  | VU       | N/A      | 97                  | 167               | 159                     | CTR: EU918240                                                                                                             | [69]                  |                                               |
| Acroporidae | <i>Acropora tenuis</i>          | Yes  | NT       | N/A      | 297                 | 250               | 247                     | 12S: AF338425;<br>16S: AF338425;<br>AT6: AF338425;<br>COI: AF338425;<br>CTR: AF338425;<br>CYB: AF338425;<br>ND5: AF338425 | [69]                  |                                               |
| Acroporidae | <i>Acropora teres</i>           | Yes  | DD       | N/A      | 622                 | 762               | 762                     |                                                                                                                           | [69]                  |                                               |
| Acroporidae | <i>Acropora tizardi</i>         | Yes  | DD       | N/A      | 603                 | 753               | 753                     |                                                                                                                           | [69]                  | Junior synonym of <i>A. cerealis</i> [69]     |
| Acroporidae | <i>Acropora torihalimeda</i>    | Yes  | DD       | N/A      | 467                 | 582               | 582                     |                                                                                                                           | [69]                  |                                               |
| Acroporidae | <i>Acropora torresiana</i>      | Yes  | DD       | N/A      | 622                 | 762               | 762                     |                                                                                                                           | [69]                  |                                               |
| Acroporidae | <i>Acropora tortuosa</i>        | Yes  | LC       | N/A      | 545                 | 324               | 322                     | CTR: EU918238                                                                                                             | [69]                  |                                               |
| Acroporidae | <i>Acropora tumida</i>          | Yes  | DD       | N/A      | 603                 | 753               | 753                     |                                                                                                                           | [69]                  | Junior synonym of <i>A. valida</i> [69]       |
| Acroporidae | <i>Acropora turaki</i>          | Yes  | VU       | N/A      | 256                 | 567               | 567                     |                                                                                                                           | [69]                  |                                               |
| Acroporidae | <i>Acropora tutuilensis</i>     | Yes  | DD       | N/A      | 553                 | 682               | 682                     |                                                                                                                           | [69]                  | Junior synonym of <i>A. abrotanoides</i> [69] |
| Acroporidae | <i>Acropora valenciennesi</i>   | Yes  | LC       | N/A      | 835                 | 834               | 834                     |                                                                                                                           | [69]                  |                                               |
| Acroporidae | <i>Acropora valida</i>          | Yes  | LC       | N/A      | 747                 | 638               | 638                     | CTR: EU918235;<br>CYB: AF099658;<br>ND5: EU534047                                                                         | [69]                  |                                               |

| Family      | Species                           | Reef | Red List | EoE rank | EDGE rank (IUCN100) | EDGE rank (Isaac) | EDGE rank (Pessimistic) | Molecular sources                                                                                                         | Morphological sources | Remarks                                                                 |
|-------------|-----------------------------------|------|----------|----------|---------------------|-------------------|-------------------------|---------------------------------------------------------------------------------------------------------------------------|-----------------------|-------------------------------------------------------------------------|
| Acroporidae | <i>Acropora variabilis</i>        | Yes  | DD       | N/A      | 603                 | 753               | 753                     |                                                                                                                           | [69]                  | Junior synonym of <i>A. valida</i> [69]                                 |
| Acroporidae | <i>Acropora variolosa</i>         | Yes  | LC       | N/A      | 835                 | 834               | 834                     |                                                                                                                           | [69]                  | Sister species to <i>A. rudis</i> [69]                                  |
| Acroporidae | <i>Acropora vaughani</i>          | Yes  | VU       | N/A      | 83                  | 125               | 115                     | CTR: EU918224                                                                                                             | [69]                  |                                                                         |
| Acroporidae | <i>Acropora vermiculata</i>       | Yes  | DD       | N/A      | 575                 | 722               | 722                     |                                                                                                                           | [69]                  | Junior synonym of <i>A. sarmentosa</i> [69]                             |
| Acroporidae | <i>Acropora verweyi</i>           | Yes  | VU       | N/A      | 259                 | 570               | 570                     |                                                                                                                           | [69]                  |                                                                         |
| Acroporidae | <i>Acropora walindii</i>          | Yes  | VU       | N/A      | 75                  | 90                | 84                      | CTR: EU918234                                                                                                             | [69]                  | Sister species to <i>A. tenella</i> [69]                                |
| Acroporidae | <i>Acropora wallaceae</i>         | Yes  | DD       | N/A      | 551                 | 668               | 668                     |                                                                                                                           | [69]                  | Junior synonym of <i>A. samoensis</i> [69]                              |
| Acroporidae | <i>Acropora willisae</i>          | Yes  | VU       | N/A      | 256                 | 567               | 567                     |                                                                                                                           | [69]                  |                                                                         |
| Acroporidae | <i>Acropora yongei</i>            | Yes  | LC       | N/A      | 818                 | 815               | 815                     | ND5: EU534048                                                                                                             | [69]                  |                                                                         |
| Acroporidae | <i>Anacropora forbesi</i>         | Yes  | LC       | N/A      | 461                 | 196               | 188                     | COI: AB441251;<br>CYB: AB441336                                                                                           | [69]                  |                                                                         |
| Acroporidae | <i>Anacropora matthai</i>         | Yes  | VU       | N/A      | 59                  | 72                | 67                      | 12S: AY903295;<br>16S: AY903295;<br>AT6: AY903295;<br>COI: AY903295;<br>CTR: AY903295;<br>CYB: AY903295;<br>ND5: AY903295 | [69]                  |                                                                         |
| Acroporidae | <i>Anacropora pillai</i>          | Yes  | DD       | N/A      | 447                 | 488               | 482                     |                                                                                                                           | [69]                  |                                                                         |
| Acroporidae | <i>Anacropora puertogalerae</i>   | Yes  | VU       | N/A      | 138                 | 243               | 240                     |                                                                                                                           | [69]                  |                                                                         |
| Acroporidae | <i>Anacropora reticulata</i>      | Yes  | VU       | N/A      | 138                 | 243               | 240                     |                                                                                                                           | [69]                  |                                                                         |
| Acroporidae | <i>Anacropora spinosa</i>         | Yes  | EN       | N/A      | 18                  | 98                | 198                     |                                                                                                                           | [69]                  |                                                                         |
| Acroporidae | <i>Anacropora spumosa</i>         | Yes  | DD       | N/A      | 447                 | 488               | 482                     |                                                                                                                           | [69]                  |                                                                         |
| Acroporidae | <i>Astreopora acroporina</i>      | Yes  | DD       | N/A      | 541                 | 663               | 663                     |                                                                                                                           | [69]                  | New species [47]                                                        |
| Acroporidae | <i>Astreopora cenderawasih</i>    | Yes  | DD       | N/A      | 541                 | 663               | 663                     |                                                                                                                           | [69]                  | New species [47]                                                        |
| Acroporidae | <i>Astreopora cucullata</i>       | Yes  | VU       | N/A      | 176                 | 399               | 391                     |                                                                                                                           | [69]                  |                                                                         |
| Acroporidae | <i>Astreopora elliptica</i>       | Yes  | DD       | N/A      | 541                 | 663               | 663                     |                                                                                                                           | [69]                  |                                                                         |
| Acroporidae | <i>Astreopora expansa</i>         | Yes  | NT       | N/A      | 450                 | 613               | 613                     |                                                                                                                           | [69]                  |                                                                         |
| Acroporidae | <i>Astreopora gracilis</i>        | Yes  | LC       | N/A      | 799                 | 743               | 743                     |                                                                                                                           | [69]                  |                                                                         |
| Acroporidae | <i>Astreopora incrustans</i>      | Yes  | VU       | N/A      | 176                 | 399               | 391                     |                                                                                                                           | [69]                  |                                                                         |
| Acroporidae | <i>Astreopora listeri</i>         | Yes  | LC       | N/A      | 799                 | 743               | 743                     |                                                                                                                           | [69]                  |                                                                         |
| Acroporidae | <i>Astreopora macrostoma</i>      | Yes  | NT       | N/A      | 450                 | 613               | 613                     |                                                                                                                           | [69]                  |                                                                         |
| Acroporidae | <i>Astreopora montiporina</i>     | Yes  | DD       | N/A      | 541                 | 663               | 663                     |                                                                                                                           | [69]                  | New species [47]                                                        |
| Acroporidae | <i>Astreopora moretonensis</i>    | Yes  | VU       | N/A      | 176                 | 399               | 391                     |                                                                                                                           | [69]                  |                                                                         |
| Acroporidae | <i>Astreopora myriophthalma</i>   | Yes  | LC       | N/A      | 446                 | 164               | 156                     | 12S: AF177046;<br>AT6: AB033186;<br>COI: AB441253;<br>CYB: AB441338                                                       | [69]                  |                                                                         |
| Acroporidae | <i>Astreopora ocellata</i>        | Yes  | LC       | N/A      | 799                 | 743               | 743                     |                                                                                                                           | [69]                  |                                                                         |
| Acroporidae | <i>Astreopora randalli</i>        | Yes  | LC       | N/A      | 799                 | 743               | 743                     |                                                                                                                           | [69]                  |                                                                         |
| Acroporidae | <i>Astreopora scabra</i>          | Yes  | LC       | N/A      | 799                 | 743               | 743                     |                                                                                                                           | [69]                  |                                                                         |
| Acroporidae | <i>Astreopora suggesta</i>        | Yes  | LC       | N/A      | 799                 | 743               | 743                     |                                                                                                                           | [69]                  |                                                                         |
| Acroporidae | <i>Enigmopora darvelienseis</i>   | Yes  | DD       | N/A      | 682                 | 806               | 806                     |                                                                                                                           | [69]                  | Closest to <i>Acropora</i> (prior to elevation of <i>Isopora</i> ) [77] |
| Acroporidae | <i>Isopora brueggemanni</i>       | Yes  | VU       | N/A      | 93                  | 151               | 141                     | 12S: AF333048;<br>AT6: AB033193;<br>COI: AB441247;<br>CYB: AB441332;<br>ND5: EU534004                                     | [69]                  |                                                                         |
| Acroporidae | <i>Isopora crateriformis</i>      | Yes  | VU       | N/A      | 169                 | 369               | 361                     |                                                                                                                           | [69]                  |                                                                         |
| Acroporidae | <i>Isopora cuneata</i>            | Yes  | VU       | N/A      | 26                  | 16                | 11                      | 12S: AF333049;<br>CTR: AY026429;<br>ND5: EU534006                                                                         | [69]                  |                                                                         |
| Acroporidae | <i>Isopora cylindrica</i>         | Yes  | DD       | N/A      | 514                 | 639               | 639                     |                                                                                                                           | [69]                  |                                                                         |
| Acroporidae | <i>Isopora elizabethensis</i>     | Yes  | DD       | N/A      | 514                 | 639               | 639                     |                                                                                                                           | [69]                  |                                                                         |
| Acroporidae | <i>Isopora meridiana</i>          | Yes  | DD       | N/A      | 514                 | 639               | 639                     |                                                                                                                           | [69]                  | Junior synonym of <i>Acropora brueggemanni</i> [69]                     |
| Acroporidae | <i>Isopora palifera</i>           | Yes  | NT       | N/A      | 309                 | 294               | 293                     | 12S: AF177044;<br>16S: AF265593;<br>AT6: AB033194;<br>COI: AB441248;<br>CYB: AB441333;<br>ND5: EU534010                   | [69]                  |                                                                         |
| Acroporidae | <i>Isopora togianensis</i>        | Yes  | EN       | N/A      | 20                  | 107               | 214                     | 12S: AF333050;<br>COI: AB441249;<br>CYB: AB441334;<br>ND5: EU534008                                                       | [69]                  | Morphological coding updated [94]                                       |
| Acroporidae | <i>Montipora aequituberculata</i> | Yes  | LC       | N/A      | 726                 | 610               | 610                     | 12S: AF333045;<br>AT6: AB033187;<br>CTR: AY313548;<br>CYB: AB033172                                                       | [69]                  |                                                                         |
| Acroporidae | <i>Montipora altasepta</i>        | Yes  | VU       | N/A      | 58                  | 70                | 65                      | AT6: AB033190;<br>CTR: AY313572;<br>CYB: AB033175                                                                         | [69]                  |                                                                         |
| Acroporidae | <i>Montipora angulata</i>         | Yes  | VU       | N/A      | 74                  | 89                | 83                      | CTR: AY313563                                                                                                             | [69]                  |                                                                         |
| Acroporidae | <i>Montipora aspergillus</i>      | Yes  | DD       | N/A      | 587                 | 730               | 730                     |                                                                                                                           | [69]                  |                                                                         |
| Acroporidae | <i>Montipora australiensis</i>    | Yes  | VU       | N/A      | 204                 | 491               | 488                     |                                                                                                                           | [69]                  |                                                                         |

| Family      | Species                            | Reef List | Red List | EoE rank | EDGE rank (IUCN100) | EDGE rank (Isaac) | EDGE rank (Pessimistic) | Molecular sources                                                                                                         | Morphological sources | Remarks                                           |
|-------------|------------------------------------|-----------|----------|----------|---------------------|-------------------|-------------------------|---------------------------------------------------------------------------------------------------------------------------|-----------------------|---------------------------------------------------|
| Acroporidae | <i>Montipora cactus</i>            | Yes       | VU       | N/A      | 90                  | 145               | 135                     | 12S: AY903296;<br>16S: AY903296;<br>AT6: AY903296;<br>COI: AY903296;<br>CTR: AY903296;<br>CYB: AY903296;<br>ND5: AY903296 | [69]                  |                                                   |
| Acroporidae | <i>Montipora calcarea</i>          | Yes       | VU       | N/A      | 204                 | 491               | 488                     |                                                                                                                           | [69]                  |                                                   |
| Acroporidae | <i>Montipora caliculata</i>        | Yes       | VU       | N/A      | 204                 | 491               | 488                     |                                                                                                                           | [69]                  |                                                   |
| Acroporidae | <i>Montipora capitata</i>          | Yes       | NT       | N/A      | 338                 | 367               | 359                     | 16S: HQ246709;<br>AT6: HQ246686;<br>COI: HQ246613;<br>CTR: HQ246520;<br>CYB: HQ246516                                     | [69]                  |                                                   |
| Acroporidae | <i>Montipora capricornis</i>       | Yes       | VU       | N/A      | 76                  | 94                | 88                      | CTR: AY313583                                                                                                             | [69]                  |                                                   |
| Acroporidae | <i>Montipora cebuensis</i>         | Yes       | VU       | N/A      | 204                 | 491               | 488                     |                                                                                                                           | [69]                  |                                                   |
| Acroporidae | <i>Montipora circumvallata</i>     | Yes       | LC       | N/A      | 276                 | 13                | 9                       | 16S: AF550368                                                                                                             | [69]                  |                                                   |
| Acroporidae | <i>Montipora cocosensis</i>        | Yes       | VU       | N/A      | 204                 | 491               | 488                     |                                                                                                                           | [69]                  |                                                   |
| Acroporidae | <i>Montipora confusa</i>           | Yes       | NT       | N/A      | 300                 | 265               | 263                     | CTR: AY313551                                                                                                             | [69]                  |                                                   |
| Acroporidae | <i>Montipora corbettensis</i>      | Yes       | VU       | N/A      | 204                 | 491               | 488                     |                                                                                                                           | [69]                  |                                                   |
| Acroporidae | <i>Montipora crassituberculata</i> | Yes       | VU       | N/A      | 204                 | 491               | 488                     |                                                                                                                           | [69]                  |                                                   |
| Acroporidae | <i>Montipora cryptus</i>           | Yes       | NT       | N/A      | 489                 | 671               | 671                     |                                                                                                                           | [69]                  |                                                   |
| Acroporidae | <i>Montipora danae</i>             | Yes       | LC       | N/A      | 609                 | 435               | 427                     | CTR: AY313549                                                                                                             | [69]                  |                                                   |
| Acroporidae | <i>Montipora delicatula</i>        | Yes       | VU       | N/A      | 118                 | 209               | 203                     | CTR: AY313566                                                                                                             | [69]                  |                                                   |
| Acroporidae | <i>Montipora digitata</i>          | Yes       | LC       | N/A      | 768                 | 687               | 687                     | 12S: AF177045;<br>16S: L75993;<br>AT6: AB033188;<br>CTR: AY313579;<br>CYB: AB033173                                       | [69]                  |                                                   |
| Acroporidae | <i>Montipora dilatata</i>          | Yes       | EN       | N/A      | 25                  | 156               | 282                     | 16S: HQ246702;<br>AT6: HQ246678;<br>COI: HQ246605;<br>CTR: HQ246554;<br>CYB: HQ246508                                     | [69]                  |                                                   |
| Acroporidae | <i>Montipora echinata</i>          | Yes       | DD       | N/A      | 587                 | 730               | 730                     |                                                                                                                           | [69]                  |                                                   |
| Acroporidae | <i>Montipora efflorescens</i>      | Yes       | NT       | N/A      | 253                 | 136               | 126                     | AT6: AB033189;<br>CYB: AB033174                                                                                           | [69]                  |                                                   |
| Acroporidae | <i>Montipora effusa</i>            | Yes       | NT       | N/A      | 489                 | 671               | 671                     |                                                                                                                           | [69]                  |                                                   |
| Acroporidae | <i>Montipora flabellata</i>        | Yes       | VU       | N/A      | 155                 | 299               | 298                     | 16S: HQ246698;<br>AT6: HQ246674;<br>COI: HQ246601;<br>CTR: HQ246561;<br>CYB: HQ246504                                     | [69]                  |                                                   |
| Acroporidae | <i>Montipora florida</i>           | Yes       | VU       | N/A      | 81                  | 105               | 98                      | CTR: AY313562                                                                                                             | [69]                  |                                                   |
| Acroporidae | <i>Montipora floweri</i>           | Yes       | LC       | N/A      | 810                 | 807               | 807                     |                                                                                                                           | [69]                  |                                                   |
| Acroporidae | <i>Montipora foliosa</i>           | Yes       | NT       | N/A      | 239                 | 133               | 122                     | CYB: FJ392003                                                                                                             | [69]                  |                                                   |
| Acroporidae | <i>Montipora foveolata</i>         | Yes       | NT       | N/A      | 489                 | 671               | 671                     |                                                                                                                           | [69]                  |                                                   |
| Acroporidae | <i>Montipora friabilis</i>         | Yes       | VU       | N/A      | 204                 | 491               | 488                     |                                                                                                                           | [69]                  |                                                   |
| Acroporidae | <i>Montipora gainardi</i>          | Yes       | VU       | N/A      | 72                  | 87                | 81                      | CTR: AY313565                                                                                                             | [69]                  |                                                   |
| Acroporidae | <i>Montipora grisea</i>            | Yes       | LC       | N/A      | 810                 | 807               | 807                     |                                                                                                                           | [69]                  |                                                   |
| Acroporidae | <i>Montipora hemispherica</i>      | Yes       | DD       | N/A      | 587                 | 730               | 730                     |                                                                                                                           | [69]                  |                                                   |
| Acroporidae | <i>Montipora hirsuta</i>           | Yes       | NT       | N/A      | 489                 | 671               | 671                     |                                                                                                                           | [69]                  |                                                   |
| Acroporidae | <i>Montipora hispida</i>           | Yes       | LC       | N/A      | 663                 | 454               | 446                     | CTR: AY313553;<br>CYB: FJ392005                                                                                           | [69]                  |                                                   |
| Acroporidae | <i>Montipora hodgsoni</i>          | Yes       | VU       | N/A      | 204                 | 491               | 488                     |                                                                                                                           | [69]                  |                                                   |
| Acroporidae | <i>Montipora hoffmeisteri</i>      | Yes       | LC       | N/A      | 770                 | 689               | 689                     | CTR: AY313580                                                                                                             | [69]                  |                                                   |
| Acroporidae | <i>Montipora incrassata</i>        | Yes       | NT       | N/A      | 324                 | 330               | 328                     | 16S: HQ246710;<br>AT6: HQ246687;<br>COI: HQ246614;<br>CTR: HQ246593;<br>CYB: HQ246517                                     | [69]                  | <i>Montipora</i> cf. <i>incrassata</i> in GenBank |
| Acroporidae | <i>Montipora informis</i>          | Yes       | LC       | N/A      | 810                 | 807               | 807                     |                                                                                                                           | [69]                  |                                                   |
| Acroporidae | <i>Montipora kelyi</i>             | Yes       | DD       | N/A      | 587                 | 730               | 730                     |                                                                                                                           | [69]                  |                                                   |
| Acroporidae | <i>Montipora lobulata</i>          | Yes       | VU       | N/A      | 204                 | 491               | 488                     |                                                                                                                           | [69]                  |                                                   |
| Acroporidae | <i>Montipora mactanensis</i>       | Yes       | VU       | N/A      | 204                 | 491               | 488                     |                                                                                                                           | [69]                  |                                                   |
| Acroporidae | <i>Montipora malampaya</i>         | Yes       | VU       | N/A      | 204                 | 491               | 488                     |                                                                                                                           | [69]                  |                                                   |
| Acroporidae | <i>Montipora meandrina</i>         | Yes       | VU       | N/A      | 204                 | 491               | 488                     |                                                                                                                           | [69]                  |                                                   |
| Acroporidae | <i>Montipora millepora</i>         | Yes       | LC       | N/A      | 810                 | 807               | 807                     |                                                                                                                           | [69]                  |                                                   |
| Acroporidae | <i>Montipora mollis</i>            | Yes       | LC       | N/A      | 785                 | 704               | 704                     | CTR: AY313552                                                                                                             | [69]                  |                                                   |
| Acroporidae | <i>Montipora monasteriata</i>      | Yes       | LC       | N/A      | 810                 | 807               | 807                     |                                                                                                                           | [69]                  |                                                   |
| Acroporidae | <i>Montipora niugini</i>           | Yes       | NT       | N/A      | 489                 | 671               | 671                     |                                                                                                                           | [69]                  |                                                   |
| Acroporidae | <i>Montipora nodosa</i>            | Yes       | NT       | N/A      | 489                 | 671               | 671                     |                                                                                                                           | [69]                  |                                                   |
| Acroporidae | <i>Montipora orientalis</i>        | Yes       | VU       | N/A      | 204                 | 491               | 488                     |                                                                                                                           | [69]                  |                                                   |
| Acroporidae | <i>Montipora pachytuberculata</i>  | Yes       | DD       | N/A      | 587                 | 730               | 730                     |                                                                                                                           | [69]                  |                                                   |
| Acroporidae | <i>Montipora palawanensis</i>      | Yes       | NT       | N/A      | 489                 | 671               | 671                     |                                                                                                                           | [69]                  |                                                   |
| Acroporidae | <i>Montipora patula</i>            | Yes       | VU       | N/A      | 117                 | 208               | 202                     | 16S: HQ246691;<br>AT6: HQ246667;<br>COI: HQ246595;<br>CTR: HQ246573;<br>CYB: HQ246497                                     | [69]                  |                                                   |

| Family      | Species                          | Reef | Red List | EoE rank | EDGE rank (IUCN100) | EDGE rank (Isaac) | EDGE rank (Pessimistic) | Molecular sources                                                                                       | Morphological sources | Remarks                                                                                    |
|-------------|----------------------------------|------|----------|----------|---------------------|-------------------|-------------------------|---------------------------------------------------------------------------------------------------------|-----------------------|--------------------------------------------------------------------------------------------|
| Acroporidae | <i>Montipora peltiformis</i>     | Yes  | NT       | N/A      | 363                 | 420               | 412                     | CTR: AY313550                                                                                           | [69]                  |                                                                                            |
| Acroporidae | <i>Montipora porites</i>         | Yes  | NT       | N/A      | 489                 | 671               | 671                     |                                                                                                         | [69]                  |                                                                                            |
| Acroporidae | <i>Montipora samarensis</i>      | Yes  | VU       | N/A      | 204                 | 491               | 488                     |                                                                                                         | [69]                  |                                                                                            |
| Acroporidae | <i>Montipora saudii</i>          | Yes  | NT       | N/A      | 489                 | 671               | 671                     |                                                                                                         | [69]                  |                                                                                            |
| Acroporidae | <i>Montipora setosa</i>          | Yes  | EN       | N/A      | 52                  | 311               | 461                     |                                                                                                         | [69]                  |                                                                                            |
| Acroporidae | <i>Montipora spongiosa</i>       | Yes  | LC       | N/A      | 810                 | 807               | 807                     |                                                                                                         | [69]                  |                                                                                            |
| Acroporidae | <i>Montipora spongodes</i>       | Yes  | LC       | N/A      | 769                 | 688               | 688                     | CTR: AY313547                                                                                           | [69]                  |                                                                                            |
| Acroporidae | <i>Montipora spumosa</i>         | Yes  | LC       | N/A      | 810                 | 807               | 807                     |                                                                                                         | [69]                  |                                                                                            |
| Acroporidae | <i>Montipora stellata</i>        | Yes  | LC       | N/A      | 726                 | 610               | 610                     | CTR: AY313587                                                                                           | [69]                  |                                                                                            |
| Acroporidae | <i>Montipora stitiosa</i>        | Yes  | VU       | N/A      | 204                 | 491               | 488                     |                                                                                                         | [69]                  |                                                                                            |
| Acroporidae | <i>Montipora taiwanensis</i>     | Yes  | DD       | N/A      | 587                 | 730               | 730                     |                                                                                                         | [69]                  |                                                                                            |
| Acroporidae | <i>Montipora tuberculosa</i>     | Yes  | LC       | N/A      | 810                 | 807               | 807                     |                                                                                                         | [69]                  |                                                                                            |
| Acroporidae | <i>Montipora turgescens</i>      | Yes  | LC       | N/A      | 765                 | 662               | 662                     | 16S: HQ246704;<br>AT6: HQ246681;<br>COI: HQ246608;<br>CTR: HQ246564;<br>CYB: HQ246511                   | [69]                  | <i>Montipora</i> cf. <i>turgescens</i> in GenBank                                          |
| Acroporidae | <i>Montipora turtlensis</i>      | Yes  | VU       | N/A      | 156                 | 308               | 307                     | CTR: AY313574                                                                                           | [69]                  |                                                                                            |
| Acroporidae | <i>Montipora undata</i>          | Yes  | NT       | N/A      | 286                 | 221               | 216                     | CTR: AY313569                                                                                           | [69]                  |                                                                                            |
| Acroporidae | <i>Montipora vaughani</i>        | Yes  | DD       | N/A      | 587                 | 730               | 730                     |                                                                                                         | [69]                  |                                                                                            |
| Acroporidae | <i>Montipora venosa</i>          | Yes  | NT       | N/A      | 489                 | 671               | 671                     |                                                                                                         | [69]                  |                                                                                            |
| Acroporidae | <i>Montipora verrilli</i>        | Yes  | DD       | N/A      | 436                 | 472               | 465                     | 16S: HQ246695;<br>AT6: HQ246671;<br>COI: HQ246598;<br>CTR: HQ246582;<br>CYB: HQ246501                   | [69]                  |                                                                                            |
| Acroporidae | <i>Montipora verrucosa</i>       | Yes  | LC       | N/A      | 719                 | 601               | 601                     | 12S: EF597090;<br>CTR: AY313584                                                                         | [69]                  |                                                                                            |
| Acroporidae | <i>Montipora verruculosus</i>    | Yes  | VU       | N/A      | 204                 | 491               | 488                     |                                                                                                         | [69]                  |                                                                                            |
| Acroporidae | <i>Montipora vietnamensis</i>    | Yes  | VU       | N/A      | 204                 | 491               | 488                     |                                                                                                         | [69]                  |                                                                                            |
| Agariciidae | <i>Agaricia agaricites</i>       | Yes  | LC       | N/A      | 617                 | 443               | 435                     | 12S: EF597079;<br>COI: AY451366                                                                         | [68]                  |                                                                                            |
| Agariciidae | <i>Agaricia fragilis</i>         | Yes  | DD       | N/A      | 313                 | 222               | 217                     | 12S: EF597077                                                                                           | [68]                  |                                                                                            |
| Agariciidae | <i>Agaricia grahamae</i>         | Yes  | LC       | N/A      | 684                 | 526               | 526                     | 12S: EF597078                                                                                           |                       |                                                                                            |
| Agariciidae | <i>Agaricia humilis</i>          | Yes  | LC       | N/A      | 540                 | 318               | 316                     | 12S: DQ643831;<br>16S: DQ643831;<br>AT6: DQ643831;<br>COI: DQ643831;<br>CYB: DQ643831;<br>ND5: DQ643831 |                       |                                                                                            |
| Agariciidae | <i>Agaricia lamarcki</i>         | Yes  | VU       | N/A      | 51                  | 61                | 56                      | 12S: EF597076;<br>COI: AY451369                                                                         |                       |                                                                                            |
| Agariciidae | <i>Agaricia tenuifolia</i>       | Yes  | NT       | N/A      | 323                 | 327               | 325                     | 12S: EF597081;<br>COI: AY451370                                                                         |                       |                                                                                            |
| Agariciidae | <i>Agaricia undata</i>           | Yes  | DD       | N/A      | 397                 | 393               | 385                     | 12S: EF597075                                                                                           |                       |                                                                                            |
| Agariciidae | <i>Coeloseris mayeri</i>         | Yes  | LC       | ED       | 674                 | 477               | 471                     |                                                                                                         |                       | Closest to <i>Pavona</i> [90]                                                              |
| Agariciidae | <i>Gardineroseris planulata</i>  | Yes  | LC       | N/A      | 556                 | 338               | 336                     | 12S: EF597084;<br>COI: AB441218;<br>CYB: AB441303                                                       |                       |                                                                                            |
| Agariciidae | <i>Helioseria cucullata</i>      | Yes  | LC       | N/A      | 370                 | 71                | 66                      | COI: AB441220;<br>CYB: AB441305                                                                         | [68]                  |                                                                                            |
| Agariciidae | <i>Leptoseris amitoriensis</i>   | Yes  | NT       | N/A      | 353                 | 403               | 395                     |                                                                                                         |                       | <i>Leptoseris</i> monophyly assumed; closest to <i>L. papyracea</i> [91]                   |
| Agariciidae | <i>Leptoseris cailleti</i>       | Yes  | LC       | N/A      | 735                 | 621               | 621                     |                                                                                                         |                       | <i>Leptoseris</i> monophyly assumed; closest to <i>L. papyracea</i> [92]                   |
| Agariciidae | <i>Leptoseris explanata</i>      | Yes  | LC       | N/A      | 735                 | 621               | 621                     |                                                                                                         |                       | <i>Leptoseris</i> monophyly assumed                                                        |
| Agariciidae | <i>Leptoseris foliosa</i>        | Yes  | LC       | N/A      | 735                 | 621               | 621                     |                                                                                                         |                       | <i>Leptoseris</i> monophyly assumed; closest to <i>L. mycetoseroides</i> [90]              |
| Agariciidae | <i>Leptoseris gardineri</i>      | Yes  | LC       | N/A      | 735                 | 621               | 621                     |                                                                                                         |                       | <i>Leptoseris</i> monophyly assumed; closest to <i>L. papyracea</i> [90]                   |
| Agariciidae | <i>Leptoseris hawaiiensis</i>    | Yes  | LC       | N/A      | 735                 | 621               | 621                     |                                                                                                         |                       | <i>Leptoseris</i> monophyly assumed; closest to <i>L. scabra</i> [90]                      |
| Agariciidae | <i>Leptoseris incrustans</i>     | Yes  | VU       | N/A      | 123                 | 223               | 219                     | 16S: L76012                                                                                             |                       |                                                                                            |
| Agariciidae | <i>Leptoseris mycetoseroides</i> | Yes  | LC       | N/A      | 735                 | 621               | 621                     |                                                                                                         |                       | <i>Leptoseris</i> monophyly assumed                                                        |
| Agariciidae | <i>Leptoseris papyracea</i>      | Yes  | LC       | N/A      | 735                 | 621               | 621                     |                                                                                                         |                       | <i>Leptoseris</i> monophyly assumed                                                        |
| Agariciidae | <i>Leptoseris scabra</i>         | Yes  | LC       | N/A      | 735                 | 621               | 621                     |                                                                                                         |                       | <i>Leptoseris</i> monophyly assumed                                                        |
| Agariciidae | <i>Leptoseris solida</i>         | Yes  | LC       | N/A      | 735                 | 621               | 621                     |                                                                                                         |                       | <i>Leptoseris</i> monophyly assumed; closest to <i>L. scabra</i> [92]                      |
| Agariciidae | <i>Leptoseris striata</i>        | Yes  | NT       | N/A      | 353                 | 403               | 395                     |                                                                                                         |                       | <i>Leptoseris</i> monophyly assumed; closest to <i>L. scabra</i> [93]                      |
| Agariciidae | <i>Leptoseris tubulifera</i>     | Yes  | LC       | N/A      | 735                 | 621               | 621                     |                                                                                                         |                       | <i>Leptoseris</i> monophyly assumed                                                        |
| Agariciidae | <i>Leptoseris yabei</i>          | Yes  | VU       | N/A      | 129                 | 229               | 225                     |                                                                                                         |                       | <i>Leptoseris</i> monophyly assumed; closest to <i>L. mycetoseroides</i> [90]              |
| Agariciidae | <i>Pachyseris foliosa</i>        | Yes  | LC       | N/A      | 686                 | 536               | 536                     |                                                                                                         |                       | <i>Pachyseris</i> monophyly assumed; closest to <i>P. involuta</i> [91]                    |
| Agariciidae | <i>Pachyseris gemmae</i>         | Yes  | NT       | N/A      | 278                 | 197               | 190                     |                                                                                                         |                       | <i>Pachyseris</i> monophyly assumed; closest to <i>P. rugosa</i> & <i>P. speciosa</i> [92] |
| Agariciidae | <i>Pachyseris involuta</i>       | Yes  | VU       | N/A      | 98                  | 168               | 160                     |                                                                                                         |                       | <i>Pachyseris</i> monophyly assumed                                                        |
| Agariciidae | <i>Pachyseris rugosa</i>         | Yes  | VU       | N/A      | 57                  | 69                | 64                      |                                                                                                         |                       | <i>Pachyseris</i> monophyly assumed                                                        |
| Agariciidae | <i>Pachyseris speciosa</i>       | Yes  | LC       | N/A      | 380                 | 83                | 78                      | COI: AB441222;<br>CYB: AB441307                                                                         |                       |                                                                                            |
| Agariciidae | <i>Pavona bipartita</i>          | Yes  | VU       | N/A      | 124                 | 224               | 220                     |                                                                                                         | [64]                  |                                                                                            |

| Family           | Species                            | Reef | Red List | EoE rank | EDGE rank (IUCN100) | EDGE rank (Isaac) | EDGE rank (Pessimistic) | Molecular sources                                                                                       | Morphological sources | Remarks                                                                          |
|------------------|------------------------------------|------|----------|----------|---------------------|-------------------|-------------------------|---------------------------------------------------------------------------------------------------------|-----------------------|----------------------------------------------------------------------------------|
| Agariciidae      | <i>Pavona cactus</i>               | Yes  | VU       | N/A      | 17                  | 10                | 6                       | 16S: AF550370;<br>COI: AB441217;<br>CYB: AB441302                                                       | [64]                  |                                                                                  |
| Agariciidae      | <i>Pavona chiriquiensis</i>        | Yes  | LC       | N/A      | 730                 | 616               | 616                     |                                                                                                         | [64]                  |                                                                                  |
| Agariciidae      | <i>Pavona clavus</i>               | Yes  | LC       | N/A      | 570                 | 368               | 360                     | 12S: DQ643836;<br>16S: DQ643836;<br>AT6: DQ643836;<br>COI: DQ643836;<br>CYB: DQ643836;<br>ND5: DQ643836 | [64]                  |                                                                                  |
| Agariciidae      | <i>Pavona danai</i>                | Yes  | VU       | N/A      | 124                 | 224               | 220                     |                                                                                                         | [64]                  |                                                                                  |
| Agariciidae      | <i>Pavona decussata</i>            | Yes  | VU       | N/A      | 124                 | 224               | 220                     |                                                                                                         | [64]                  |                                                                                  |
| Agariciidae      | <i>Pavona diffluens</i>            | Yes  | VU       | N/A      | 124                 | 224               | 220                     |                                                                                                         | [64]                  |                                                                                  |
| Agariciidae      | <i>Pavona duerdeni</i>             | Yes  | LC       | N/A      | 730                 | 616               | 616                     |                                                                                                         | [64]                  |                                                                                  |
| Agariciidae      | <i>Pavona explanulata</i>          | Yes  | LC       | N/A      | 730                 | 616               | 616                     |                                                                                                         | [64]                  |                                                                                  |
| Agariciidae      | <i>Pavona frondifera</i>           | Yes  | LC       | N/A      | 517                 | 284               | 283                     | 12S: AF333055                                                                                           | [64]                  |                                                                                  |
| Agariciidae      | <i>Pavona gigantea</i>             | Yes  | LC       | N/A      | 730                 | 616               | 616                     |                                                                                                         | [64]                  |                                                                                  |
| Agariciidae      | <i>Pavona maldivensis</i>          | Yes  | LC       | N/A      | 730                 | 616               | 616                     |                                                                                                         | [64]                  |                                                                                  |
| Agariciidae      | <i>Pavona minuta</i>               | Yes  | NT       | N/A      | 352                 | 402               | 394                     |                                                                                                         | [64]                  |                                                                                  |
| Agariciidae      | <i>Pavona varians</i>              | Yes  | LC       | N/A      | 669                 | 464               | 456                     | 12S: EF597083;<br>16S: L76016                                                                           | [64]                  |                                                                                  |
| Agariciidae      | <i>Pavona venosa</i>               | Yes  | VU       | N/A      | 124                 | 224               | 220                     |                                                                                                         | [64]                  |                                                                                  |
| Agariciidae      | <i>Pavona xarifae</i>              | Yes  | DD       | N/A      | 439                 | 480               | 474                     |                                                                                                         | [64]                  |                                                                                  |
| Anthemiphyllidae | <i>Anthemiphyllia dentata</i>      | No   | N/A      | N/A      | N/A                 | N/A               | N/A                     | COI: HM018603                                                                                           | [64]                  |                                                                                  |
| Anthemiphyllidae | <i>Anthemiphyllia frustum</i>      | No   | N/A      | N/A      | N/A                 | N/A               | N/A                     |                                                                                                         | [64]                  |                                                                                  |
| Anthemiphyllidae | <i>Anthemiphyllia macrolobata</i>  | No   | N/A      | N/A      | N/A                 | N/A               | N/A                     |                                                                                                         | [64]                  |                                                                                  |
| Anthemiphyllidae | <i>Anthemiphyllia multidentata</i> | No   | N/A      | N/A      | N/A                 | N/A               | N/A                     |                                                                                                         | [64]                  |                                                                                  |
| Anthemiphyllidae | <i>Anthemiphyllia pacifica</i>     | No   | N/A      | N/A      | N/A                 | N/A               | N/A                     |                                                                                                         | [64]                  |                                                                                  |
| Anthemiphyllidae | <i>Anthemiphyllia patera</i>       | No   | N/A      | N/A      | N/A                 | N/A               | N/A                     | COI: HM018604                                                                                           | [64]                  |                                                                                  |
| Anthemiphyllidae | <i>Anthemiphyllia spinifera</i>    | No   | N/A      | N/A      | N/A                 | N/A               | N/A                     | 16S: AF265596                                                                                           | [64]                  |                                                                                  |
| Astrocoeniidae   | <i>Madracis asanoi</i>             | Yes  | DD       | N/A      | 252                 | 81                | 76                      | COI: HM018656                                                                                           |                       |                                                                                  |
| Astrocoeniidae   | <i>Madracis asperula</i>           | Yes  | DD       | N/A      | 273                 | 113               | 105                     |                                                                                                         |                       | Closest to <i>M. asanoi</i> [92]<br>Probably <i>M. mirabilis</i> in GenBank [84] |
| Astrocoeniidae   | <i>Madracis auretenra</i>          | Yes  | LC       | N/A      | 469                 | 207               | 201                     |                                                                                                         |                       |                                                                                  |
| Astrocoeniidae   | <i>Madracis carmabi</i>            | Yes  | DD       | N/A      | 292                 | 166               | 158                     | 12S: EF596980                                                                                           |                       |                                                                                  |
| Astrocoeniidae   | <i>Madracis decactis</i>           | Yes  | LC       | N/A      | 482                 | 251               | 248                     | 12S: EF596982                                                                                           | [68]                  |                                                                                  |
| Astrocoeniidae   | <i>Madracis formosa</i>            | Yes  | LC       | N/A      | 463                 | 200               | 193                     | 12S: EF596981                                                                                           |                       |                                                                                  |
| Astrocoeniidae   | <i>Madracis kirbyi</i>             | Yes  | LC       | N/A      | 483                 | 252               | 249                     |                                                                                                         |                       | Closest to <i>M. decactis</i> [92]                                               |
| Astrocoeniidae   | <i>Madracis pharensis</i>          | Yes  | LC       | N/A      | 462                 | 198               | 191                     | 12S: EF596983                                                                                           |                       |                                                                                  |
| Astrocoeniidae   | <i>Madracis senaria</i>            | Yes  | LC       | N/A      | 464                 | 201               | 194                     | 12S: EF596979                                                                                           |                       |                                                                                  |
| Astrocoeniidae   | <i>Palauastrea ramosa</i>          | Yes  | NT       | N/A      | 275                 | 175               | 166                     |                                                                                                         |                       | Closest to <i>Madracis</i> [97]                                                  |
| Astrocoeniidae   | <i>Stephanocoenia intersepta</i>   | Yes  | LC       | ED       | 321                 | 33                | 27                      | 12S: EF597072;<br>COI: AB441228;<br>CYB: AB441313                                                       | [68]                  | Senior synonym of <i>S. michelinii</i>                                           |
| Astrocoeniidae   | <i>Stylocoeniella armata</i>       | Yes  | LC       | N/A      | 503                 | 264               | 262                     |                                                                                                         |                       | <i>Stylocoeniella</i> monophyly assumed; closest to <i>S. guentheri</i> [92]     |
| Astrocoeniidae   | <i>Stylocoeniella cocosensis</i>   | Yes  | VU       | N/A      | 54                  | 66                | 61                      |                                                                                                         |                       | <i>Stylocoeniella</i> monophyly assumed                                          |
| Astrocoeniidae   | <i>Stylocoeniella guentheri</i>    | Yes  | LC       | N/A      | 389                 | 92                | 86                      | COI: AB441225;<br>CYB: AB441310                                                                         |                       |                                                                                  |
| Astrocoeniidae   | <i>Stylocoeniella muscosus</i>     | Yes  | DD       | N/A      | 328                 | 256               | 254                     |                                                                                                         |                       | <i>Stylocoeniella</i> monophyly assumed                                          |
| Caryophylliidae  | <i>Caryophyllia abrupta</i>        | No   | N/A      | N/A      | N/A                 | N/A               | N/A                     |                                                                                                         | [64]                  |                                                                                  |
| Caryophylliidae  | <i>Caryophyllia abyssorum</i>      | No   | N/A      | N/A      | N/A                 | N/A               | N/A                     |                                                                                                         | [64]                  |                                                                                  |
| Caryophylliidae  | <i>Caryophyllia alaskensis</i>     | No   | N/A      | N/A      | N/A                 | N/A               | N/A                     |                                                                                                         | [64]                  |                                                                                  |
| Caryophylliidae  | <i>Caryophyllia alberti</i>        | No   | N/A      | N/A      | N/A                 | N/A               | N/A                     |                                                                                                         | [64]                  |                                                                                  |
| Caryophylliidae  | <i>Caryophyllia ambrosia</i>       | No   | N/A      | N/A      | N/A                 | N/A               | N/A                     | 16S: AF550362                                                                                           | [64,68]               |                                                                                  |
| Caryophylliidae  | <i>Caryophyllia antarctica</i>     | No   | N/A      | N/A      | N/A                 | N/A               | N/A                     |                                                                                                         | [64]                  |                                                                                  |
| Caryophylliidae  | <i>Caryophyllia antillarum</i>     | No   | N/A      | N/A      | N/A                 | N/A               | N/A                     |                                                                                                         | [64]                  |                                                                                  |
| Caryophylliidae  | <i>Caryophyllia arnoldi</i>        | No   | N/A      | N/A      | N/A                 | N/A               | N/A                     |                                                                                                         | [64]                  |                                                                                  |
| Caryophylliidae  | <i>Caryophyllia aspera</i>         | No   | N/A      | N/A      | N/A                 | N/A               | N/A                     |                                                                                                         | [64]                  |                                                                                  |
| Caryophylliidae  | <i>Caryophyllia atlantica</i>      | No   | N/A      | N/A      | N/A                 | N/A               | N/A                     | 16S: FJ788113;<br>COI: HM018613                                                                         | [64]                  |                                                                                  |
| Caryophylliidae  | <i>Caryophyllia balanacea</i>      | No   | N/A      | N/A      | N/A                 | N/A               | N/A                     |                                                                                                         | [64]                  |                                                                                  |
| Caryophylliidae  | <i>Caryophyllia barbadensis</i>    | No   | N/A      | N/A      | N/A                 | N/A               | N/A                     |                                                                                                         | [64]                  |                                                                                  |
| Caryophylliidae  | <i>Caryophyllia berteriana</i>     | No   | N/A      | N/A      | N/A                 | N/A               | N/A                     |                                                                                                         | [64]                  |                                                                                  |
| Caryophylliidae  | <i>Caryophyllia calveri</i>        | No   | N/A      | N/A      | N/A                 | N/A               | N/A                     |                                                                                                         | [64]                  |                                                                                  |
| Caryophylliidae  | <i>Caryophyllia cincticulatus</i>  | No   | N/A      | N/A      | N/A                 | N/A               | N/A                     |                                                                                                         | [64]                  |                                                                                  |
| Caryophylliidae  | <i>Caryophyllia concreta</i>       | No   | N/A      | N/A      | N/A                 | N/A               | N/A                     |                                                                                                         | [64]                  |                                                                                  |

| Family          | Species                            | Reef List | Red List | EoE rank | EDGE rank (IUCN100) | EDGE rank (Isaac) | EDGE rank (Pessimistic) | Molecular sources               | Morphological sources | Remarks |
|-----------------|------------------------------------|-----------|----------|----------|---------------------|-------------------|-------------------------|---------------------------------|-----------------------|---------|
| Caryophylliidae | <i>Caryophyllia cornutum</i>       | No        | N/A      | N/A      | N/A                 | N/A               | N/A                     |                                 |                       | [64]    |
| Caryophylliidae | <i>Caryophyllia corona</i>         | No        | N/A      | N/A      | N/A                 | N/A               | N/A                     |                                 |                       | [64]    |
| Caryophylliidae | <i>Caryophyllia corrugata</i>      | No        | N/A      | N/A      | N/A                 | N/A               | N/A                     |                                 |                       | [64]    |
| Caryophylliidae | <i>Caryophyllia crosnieri</i>      | No        | N/A      | N/A      | N/A                 | N/A               | N/A                     |                                 |                       | [64]    |
| Caryophylliidae | <i>Caryophyllia crypta</i>         | No        | N/A      | N/A      | N/A                 | N/A               | N/A                     |                                 |                       | [64]    |
| Caryophylliidae | <i>Caryophyllia cyathus</i>        | No        | N/A      | N/A      | N/A                 | N/A               | N/A                     |                                 |                       | [64]    |
| Caryophylliidae | <i>Caryophyllia decamera</i>       | No        | N/A      | N/A      | N/A                 | N/A               | N/A                     |                                 |                       | [64]    |
| Caryophylliidae | <i>Caryophyllia dentata</i>        | No        | N/A      | N/A      | N/A                 | N/A               | N/A                     |                                 |                       | [64]    |
| Caryophylliidae | <i>Caryophyllia diomedea</i>       | No        | N/A      | N/A      | N/A                 | N/A               | N/A                     | 16S: FJ788115;<br>COI: HM018614 |                       | [64]    |
| Caryophylliidae | <i>Caryophyllia eltaninae</i>      | No        | N/A      | N/A      | N/A                 | N/A               | N/A                     |                                 |                       | [64]    |
| Caryophylliidae | <i>Caryophyllia ephyalae</i>       | No        | N/A      | N/A      | N/A                 | N/A               | N/A                     |                                 |                       | [64]    |
| Caryophylliidae | <i>Caryophyllia foresti</i>        | No        | N/A      | N/A      | N/A                 | N/A               | N/A                     |                                 |                       | [64]    |
| Caryophylliidae | <i>Caryophyllia grandis</i>        | No        | N/A      | N/A      | N/A                 | N/A               | N/A                     | 16S: FJ788117                   |                       | [64]    |
| Caryophylliidae | <i>Caryophyllia grayi</i>          | No        | N/A      | N/A      | N/A                 | N/A               | N/A                     | 16S: FJ788119;<br>COI: HM018615 |                       | [64]    |
| Caryophylliidae | <i>Caryophyllia hawaiiensis</i>    | No        | N/A      | N/A      | N/A                 | N/A               | N/A                     |                                 |                       | [64]    |
| Caryophylliidae | <i>Caryophyllia horologium</i>     | No        | N/A      | N/A      | N/A                 | N/A               | N/A                     |                                 |                       | [64]    |
| Caryophylliidae | <i>Caryophyllia huinayensis</i>    | No        | N/A      | N/A      | N/A                 | N/A               | N/A                     |                                 |                       | [64]    |
| Caryophylliidae | <i>Caryophyllia inornata</i>       | No        | N/A      | N/A      | N/A                 | N/A               | N/A                     | 12S: EF597042;<br>16S: AF265599 |                       | [64]    |
| Caryophylliidae | <i>Caryophyllia japonica</i>       | No        | N/A      | N/A      | N/A                 | N/A               | N/A                     |                                 |                       | [64]    |
| Caryophylliidae | <i>Caryophyllia jogashimaensis</i> | No        | N/A      | N/A      | N/A                 | N/A               | N/A                     |                                 |                       | [64]    |
| Caryophylliidae | <i>Caryophyllia karubarica</i>     | No        | N/A      | N/A      | N/A                 | N/A               | N/A                     |                                 |                       | [64]    |
| Caryophylliidae | <i>Caryophyllia laevigata</i>      | No        | N/A      | N/A      | N/A                 | N/A               | N/A                     |                                 |                       | [64]    |
| Caryophylliidae | <i>Caryophyllia lamellifera</i>    | No        | N/A      | N/A      | N/A                 | N/A               | N/A                     | 16S: FJ788120;<br>COI: HM018616 |                       | [64]    |
| Caryophylliidae | <i>Caryophyllia mabahithi</i>      | No        | N/A      | N/A      | N/A                 | N/A               | N/A                     |                                 |                       | [64]    |
| Caryophylliidae | <i>Caryophyllia marmorea</i>       | No        | N/A      | N/A      | N/A                 | N/A               | N/A                     |                                 |                       | [64]    |
| Caryophylliidae | <i>Caryophyllia oblonga</i>        | No        | N/A      | N/A      | N/A                 | N/A               | N/A                     |                                 |                       | [64]    |
| Caryophylliidae | <i>Caryophyllia octonaria</i>      | No        | N/A      | N/A      | N/A                 | N/A               | N/A                     |                                 |                       | [64]    |
| Caryophylliidae | <i>Caryophyllia octopali</i>       | No        | N/A      | N/A      | N/A                 | N/A               | N/A                     |                                 |                       | [64]    |
| Caryophylliidae | <i>Caryophyllia paradoxus</i>      | No        | N/A      | N/A      | N/A                 | N/A               | N/A                     |                                 |                       | [64]    |
| Caryophylliidae | <i>Caryophyllia paucipalata</i>    | No        | N/A      | N/A      | N/A                 | N/A               | N/A                     |                                 |                       | [64]    |
| Caryophylliidae | <i>Caryophyllia perculta</i>       | No        | N/A      | N/A      | N/A                 | N/A               | N/A                     | 16S: FJ788121                   |                       | [64]    |
| Caryophylliidae | <i>Caryophyllia planilamellata</i> | No        | N/A      | N/A      | N/A                 | N/A               | N/A                     |                                 |                       | [64]    |
| Caryophylliidae | <i>Caryophyllia polygona</i>       | No        | N/A      | N/A      | N/A                 | N/A               | N/A                     |                                 |                       | [64]    |
| Caryophylliidae | <i>Caryophyllia profunda</i>       | No        | N/A      | N/A      | N/A                 | N/A               | N/A                     |                                 |                       | [64]    |
| Caryophylliidae | <i>Caryophyllia protei</i>         | No        | N/A      | N/A      | N/A                 | N/A               | N/A                     |                                 |                       | [64]    |
| Caryophylliidae | <i>Caryophyllia quadragenaria</i>  | No        | N/A      | N/A      | N/A                 | N/A               | N/A                     |                                 |                       | [64]    |
| Caryophylliidae | <i>Caryophyllia quangdongensis</i> | No        | N/A      | N/A      | N/A                 | N/A               | N/A                     |                                 |                       | [64]    |
| Caryophylliidae | <i>Caryophyllia ralphae</i>        | No        | N/A      | N/A      | N/A                 | N/A               | N/A                     | COI: HM018617                   |                       | [64]    |
| Caryophylliidae | <i>Caryophyllia rugosa</i>         | No        | N/A      | N/A      | N/A                 | N/A               | N/A                     | 16S: FJ788123;<br>COI: HM018618 |                       | [64]    |
| Caryophylliidae | <i>Caryophyllia sarsiae</i>        | No        | N/A      | N/A      | N/A                 | N/A               | N/A                     |                                 |                       | [64]    |
| Caryophylliidae | <i>Caryophyllia scobinosa</i>      | No        | N/A      | N/A      | N/A                 | N/A               | N/A                     | 16S: FJ788124                   |                       | [64]    |
| Caryophylliidae | <i>Caryophyllia secta</i>          | No        | N/A      | N/A      | N/A                 | N/A               | N/A                     |                                 |                       | [64]    |
| Caryophylliidae | <i>Caryophyllia seguenzae</i>      | No        | N/A      | N/A      | N/A                 | N/A               | N/A                     |                                 |                       | [64]    |
| Caryophylliidae | <i>Caryophyllia sewelli</i>        | No        | N/A      | N/A      | N/A                 | N/A               | N/A                     |                                 |                       | [64]    |
| Caryophylliidae | <i>Caryophyllia smithii</i>        | No        | N/A      | N/A      | N/A                 | N/A               | N/A                     |                                 |                       | [64]    |
| Caryophylliidae | <i>Caryophyllia solida</i>         | No        | DD       | N/A      | N/A                 | N/A               | N/A                     |                                 |                       | [64]    |
| Caryophylliidae | <i>Caryophyllia spinicarens</i>    | No        | N/A      | N/A      | N/A                 | N/A               | N/A                     |                                 |                       | [64]    |
| Caryophylliidae | <i>Caryophyllia spinigera</i>      | No        | N/A      | N/A      | N/A                 | N/A               | N/A                     |                                 |                       | [64]    |
| Caryophylliidae | <i>Caryophyllia squiresi</i>       | No        | N/A      | N/A      | N/A                 | N/A               | N/A                     |                                 |                       | [64]    |
| Caryophylliidae | <i>Caryophyllia stellula</i>       | No        | N/A      | N/A      | N/A                 | N/A               | N/A                     |                                 |                       | [64]    |
| Caryophylliidae | <i>Caryophyllia tangaroae</i>      | No        | N/A      | N/A      | N/A                 | N/A               | N/A                     |                                 |                       | [64]    |
| Caryophylliidae | <i>Caryophyllia transversalis</i>  | No        | N/A      | N/A      | N/A                 | N/A               | N/A                     | 16S: FJ788125                   |                       | [64]    |
| Caryophylliidae | <i>Caryophyllia unicolorata</i>    | No        | N/A      | N/A      | N/A                 | N/A               | N/A                     | 16S: FJ788127                   |                       | [64]    |
| Caryophylliidae | <i>Caryophyllia valdiviae</i>      | No        | N/A      | N/A      | N/A                 | N/A               | N/A                     |                                 |                       | [64]    |
| Caryophylliidae | <i>Caryophyllia versicolorata</i>  | No        | N/A      | N/A      | N/A                 | N/A               | N/A                     |                                 |                       | [64]    |



| Family          | Species                               | Reef | Red List | EoE rank | EDGE rank (IUCN100) | EDGE rank (Isaac) | EDGE rank (Pessimistic) | Molecular sources                                                                     | Morphological sources | Remarks                                                                                   |
|-----------------|---------------------------------------|------|----------|----------|---------------------|-------------------|-------------------------|---------------------------------------------------------------------------------------|-----------------------|-------------------------------------------------------------------------------------------|
| Caryophylliidae | <i>Caryophyllia zanzibarenis</i>      | No   | N/A      | N/A      | N/A                 | N/A               | N/A                     |                                                                                       | [64]                  |                                                                                           |
| Caryophylliidae | <i>Caryophyllia zopyros</i>           | No   | N/A      | N/A      | N/A                 | N/A               | N/A                     |                                                                                       | [64]                  |                                                                                           |
| Caryophylliidae | <i>Ceratotrochus magnaghii</i>        | No   | N/A      | N/A      | N/A                 | N/A               | N/A                     | 16S: AF265597                                                                         |                       |                                                                                           |
| Caryophylliidae | <i>Conotrochus funiculuma</i>         | No   | N/A      | N/A      | N/A                 | N/A               | N/A                     | COI: HM018621                                                                         |                       |                                                                                           |
| Caryophylliidae | <i>Crispatotrochus cornu</i>          | No   | N/A      | N/A      | N/A                 | N/A               | N/A                     |                                                                                       | [64]                  |                                                                                           |
| Caryophylliidae | <i>Crispatotrochus curvatus</i>       | No   | N/A      | N/A      | N/A                 | N/A               | N/A                     |                                                                                       | [64]                  |                                                                                           |
| Caryophylliidae | <i>Crispatotrochus foxi</i>           | No   | N/A      | N/A      | N/A                 | N/A               | N/A                     |                                                                                       | [64]                  |                                                                                           |
| Caryophylliidae | <i>Crispatotrochus galapagensis</i>   | No   | DD       | N/A      | N/A                 | N/A               | N/A                     |                                                                                       | [64]                  |                                                                                           |
| Caryophylliidae | <i>Crispatotrochus gregarius</i>      | No   | N/A      | N/A      | N/A                 | N/A               | N/A                     |                                                                                       | [64]                  |                                                                                           |
| Caryophylliidae | <i>Crispatotrochus inornatus</i>      | No   | N/A      | N/A      | N/A                 | N/A               | N/A                     |                                                                                       | [64]                  |                                                                                           |
| Caryophylliidae | <i>Crispatotrochus irregularis</i>    | No   | N/A      | N/A      | N/A                 | N/A               | N/A                     |                                                                                       | [64]                  |                                                                                           |
| Caryophylliidae | <i>Crispatotrochus niinoi</i>         | No   | N/A      | N/A      | N/A                 | N/A               | N/A                     |                                                                                       | [64]                  |                                                                                           |
| Caryophylliidae | <i>Crispatotrochus rubescens</i>      | No   | N/A      | N/A      | N/A                 | N/A               | N/A                     |                                                                                       | [64]                  |                                                                                           |
| Caryophylliidae | <i>Crispatotrochus rugosus</i>        | No   | N/A      | N/A      | N/A                 | N/A               | N/A                     | 12S: EF597041;<br>16S: AF265600                                                       | [64]                  |                                                                                           |
| Caryophylliidae | <i>Crispatotrochus septumdentatus</i> | No   | N/A      | N/A      | N/A                 | N/A               | N/A                     |                                                                                       | [64]                  |                                                                                           |
| Caryophylliidae | <i>Crispatotrochus squirei</i>        | No   | N/A      | N/A      | N/A                 | N/A               | N/A                     |                                                                                       | [64]                  |                                                                                           |
| Caryophylliidae | <i>Crispatotrochus woodsii</i>        | No   | N/A      | N/A      | N/A                 | N/A               | N/A                     |                                                                                       | [64]                  |                                                                                           |
| Caryophylliidae | <i>Dactylotrachus cervicornis</i>     | No   | N/A      | N/A      | N/A                 | N/A               | N/A                     | COI: HM018624                                                                         |                       |                                                                                           |
| Caryophylliidae | <i>Dasmosmilia lymani</i>             | No   | N/A      | N/A      | N/A                 | N/A               | N/A                     | 16S: FJ788130;<br>COI: HM018625                                                       | [68]                  | <i>Dasmosmilia</i> cf. <i>lymani</i> in GenBank                                           |
| Caryophylliidae | <i>Dasmosmilia variegata</i>          | No   | N/A      | N/A      | N/A                 | N/A               | N/A                     |                                                                                       | [68]                  | <i>Dasmosmilia</i> monophyly assumed                                                      |
| Caryophylliidae | <i>Deltocyathus calcar</i>            | No   | N/A      | N/A      | N/A                 | N/A               | N/A                     |                                                                                       | [68]                  | <i>Deltocyathus</i> monophyly assumed                                                     |
| Caryophylliidae | <i>Deltocyathus eccentricus</i>       | No   | N/A      | N/A      | N/A                 | N/A               | N/A                     |                                                                                       | [68]                  | <i>Deltocyathus</i> monophyly assumed                                                     |
| Caryophylliidae | <i>Deltocyathus inusitatus</i>        | No   | N/A      | N/A      | N/A                 | N/A               | N/A                     | COI: HM018626                                                                         |                       |                                                                                           |
| Caryophylliidae | <i>Deltocyathus italicus</i>          | No   | N/A      | N/A      | N/A                 | N/A               | N/A                     |                                                                                       | [68]                  |                                                                                           |
| Caryophylliidae | <i>Deltocyathus magnificus</i>        | No   | N/A      | N/A      | N/A                 | N/A               | N/A                     | COI: HM018627                                                                         |                       |                                                                                           |
| Caryophylliidae | <i>Deltocyathus ornatus</i>           | No   | N/A      | N/A      | N/A                 | N/A               | N/A                     | COI: HM018628                                                                         |                       |                                                                                           |
| Caryophylliidae | <i>Deltocyathus rotulus</i>           | No   | N/A      | N/A      | N/A                 | N/A               | N/A                     | COI: HM018629                                                                         |                       |                                                                                           |
| Caryophylliidae | <i>Deltocyathus sarsi</i>             | No   | N/A      | N/A      | N/A                 | N/A               | N/A                     | COI: HM018630                                                                         |                       |                                                                                           |
| Caryophylliidae | <i>Deltocyathus suluensis</i>         | No   | N/A      | N/A      | N/A                 | N/A               | N/A                     | COI: HM018631                                                                         |                       |                                                                                           |
| Caryophylliidae | <i>Desmophyllum dianthus</i>          | No   | N/A      | N/A      | N/A                 | N/A               | N/A                     | 12S: GQ868667;<br>16S: GQ868690                                                       |                       |                                                                                           |
| Caryophylliidae | <i>Heterocyathus aequicostatus</i>    | Yes  | LC       | N/A      | 790                 | 719               | 719                     |                                                                                       |                       | <i>Heterocyathus</i> monophyly assumed; Caryophylliidae clade (M. V. Kitahara, pers comm) |
| Caryophylliidae | <i>Heterocyathus alternatus</i>       | Yes  | LC       | N/A      | 790                 | 719               | 719                     |                                                                                       |                       | <i>Heterocyathus</i> monophyly assumed; Caryophylliidae clade (M. V. Kitahara, pers comm) |
| Caryophylliidae | <i>Heterocyathus sulcatus</i>         | Yes  | LC       | N/A      | 790                 | 719               | 719                     |                                                                                       |                       | <i>Heterocyathus</i> monophyly assumed; Caryophylliidae clade (M. V. Kitahara, pers comm) |
| Caryophylliidae | <i>Hoplangia durotrix</i>             | No   | N/A      | N/A      | N/A                 | N/A               | N/A                     | 12S: EF597064                                                                         |                       |                                                                                           |
| Caryophylliidae | <i>Lophelia pertusa</i>               | No   | N/A      | N/A      | N/A                 | N/A               | N/A                     | 12S: FR821799;<br>16S: FR821799;<br>AT6: FR821799;<br>COI: FR821799;<br>CYB: FR821799 |                       |                                                                                           |
| Caryophylliidae | <i>Paracyathus andersoni</i>          | No   | N/A      | N/A      | N/A                 | N/A               | N/A                     |                                                                                       | [64]                  |                                                                                           |
| Caryophylliidae | <i>Paracyathus arcuatus</i>           | No   | N/A      | N/A      | N/A                 | N/A               | N/A                     |                                                                                       | [64]                  |                                                                                           |
| Caryophylliidae | <i>Paracyathus cavatus</i>            | No   | N/A      | N/A      | N/A                 | N/A               | N/A                     |                                                                                       | [64]                  |                                                                                           |
| Caryophylliidae | <i>Paracyathus conceptus</i>          | No   | N/A      | N/A      | N/A                 | N/A               | N/A                     |                                                                                       | [64]                  |                                                                                           |
| Caryophylliidae | <i>Paracyathus coronatus</i>          | No   | N/A      | N/A      | N/A                 | N/A               | N/A                     |                                                                                       | [64]                  |                                                                                           |
| Caryophylliidae | <i>Paracyathus darwinensis</i>        | No   | N/A      | N/A      | N/A                 | N/A               | N/A                     |                                                                                       | [64]                  |                                                                                           |
| Caryophylliidae | <i>Paracyathus ebonensis</i>          | No   | N/A      | N/A      | N/A                 | N/A               | N/A                     |                                                                                       | [64]                  |                                                                                           |
| Caryophylliidae | <i>Paracyathus fulvus</i>             | No   | N/A      | N/A      | N/A                 | N/A               | N/A                     |                                                                                       | [64]                  |                                                                                           |
| Caryophylliidae | <i>Paracyathus humilis</i>            | No   | N/A      | N/A      | N/A                 | N/A               | N/A                     |                                                                                       | [64]                  |                                                                                           |
| Caryophylliidae | <i>Paracyathus indicus</i>            | No   | N/A      | N/A      | N/A                 | N/A               | N/A                     |                                                                                       | [64]                  |                                                                                           |
| Caryophylliidae | <i>Paracyathus lifuensis</i>          | No   | N/A      | N/A      | N/A                 | N/A               | N/A                     |                                                                                       | [64]                  |                                                                                           |
| Caryophylliidae | <i>Paracyathus molokensis</i>         | No   | N/A      | N/A      | N/A                 | N/A               | N/A                     |                                                                                       | [64]                  |                                                                                           |
| Caryophylliidae | <i>Paracyathus montereyensis</i>      | No   | N/A      | N/A      | N/A                 | N/A               | N/A                     |                                                                                       | [64]                  |                                                                                           |
| Caryophylliidae | <i>Paracyathus parvulus</i>           | No   | N/A      | N/A      | N/A                 | N/A               | N/A                     |                                                                                       | [64]                  |                                                                                           |
| Caryophylliidae | <i>Paracyathus persicus</i>           | No   | N/A      | N/A      | N/A                 | N/A               | N/A                     |                                                                                       | [64]                  |                                                                                           |

| Family           | Species                            | Reef | Red List | EoE rank | EDGE rank (IUCN100) | EDGE rank (Isaac) | EDGE rank (Pessimistic) | Molecular sources               | Morphological sources | Remarks                                                                     |
|------------------|------------------------------------|------|----------|----------|---------------------|-------------------|-------------------------|---------------------------------|-----------------------|-----------------------------------------------------------------------------|
| Caryophylliidae  | <i>Paracyathus porcellanus</i>     | No   | N/A      | N/A      | N/A                 | N/A               | N/A                     |                                 | [64]                  |                                                                             |
| Caryophylliidae  | <i>Paracyathus profundus</i>       | No   | N/A      | N/A      | N/A                 | N/A               | N/A                     |                                 | [64]                  |                                                                             |
| Caryophylliidae  | <i>Paracyathus pruinus</i>         | No   | N/A      | N/A      | N/A                 | N/A               | N/A                     |                                 | [64]                  |                                                                             |
| Caryophylliidae  | <i>Paracyathus pulchellus</i>      | No   | N/A      | N/A      | N/A                 | N/A               | N/A                     | 12S: EF597027;<br>16S: AF265603 | [64]                  |                                                                             |
| Caryophylliidae  | <i>Paracyathus rotundatus</i>      | No   | N/A      | N/A      | N/A                 | N/A               | N/A                     |                                 | [64]                  |                                                                             |
| Caryophylliidae  | <i>Paracyathus stearnsii</i>       | No   | N/A      | N/A      | N/A                 | N/A               | N/A                     |                                 | [64]                  |                                                                             |
| Caryophylliidae  | <i>Paracyathus stokesii</i>        | No   | N/A      | N/A      | N/A                 | N/A               | N/A                     |                                 | [64]                  |                                                                             |
| Caryophylliidae  | <i>Paracyathus vittatus</i>        | No   | N/A      | N/A      | N/A                 | N/A               | N/A                     |                                 | [64]                  |                                                                             |
| Caryophylliidae  | <i>Phyllangia americana</i>        | No   | N/A      | N/A      | N/A                 | N/A               | N/A                     | 12S: EF597022;<br>16S: AF265605 | [64,68]               |                                                                             |
| Caryophylliidae  | <i>Phyllangia consagensis</i>      | No   | N/A      | N/A      | N/A                 | N/A               | N/A                     |                                 | [64]                  |                                                                             |
| Caryophylliidae  | <i>Phyllangia dispersa</i>         | No   | N/A      | N/A      | N/A                 | N/A               | N/A                     |                                 | [64]                  |                                                                             |
| Caryophylliidae  | <i>Phyllangia echinosepes</i>      | No   | N/A      | N/A      | N/A                 | N/A               | N/A                     |                                 | [64]                  |                                                                             |
| Caryophylliidae  | <i>Phyllangia granulata</i>        | No   | N/A      | N/A      | N/A                 | N/A               | N/A                     |                                 | [64]                  |                                                                             |
| Caryophylliidae  | <i>Phyllangia hayamaensis</i>      | No   | N/A      | N/A      | N/A                 | N/A               | N/A                     |                                 | [64]                  |                                                                             |
| Caryophylliidae  | <i>Phyllangia papuensis</i>        | No   | N/A      | N/A      | N/A                 | N/A               | N/A                     | COI: HM018660                   | [64]                  |                                                                             |
| Caryophylliidae  | <i>Phyllangia pequegnatae</i>      | No   | N/A      | N/A      | N/A                 | N/A               | N/A                     |                                 | [64]                  |                                                                             |
| Caryophylliidae  | <i>Polycyathus andamanensis</i>    | No   | N/A      | N/A      | N/A                 | N/A               | N/A                     |                                 | [64]                  |                                                                             |
| Caryophylliidae  | <i>Polycyathus atlanticus</i>      | No   | N/A      | N/A      | N/A                 | N/A               | N/A                     |                                 | [64]                  |                                                                             |
| Caryophylliidae  | <i>Polycyathus difficilis</i>      | No   | N/A      | N/A      | N/A                 | N/A               | N/A                     |                                 | [64]                  |                                                                             |
| Caryophylliidae  | <i>Polycyathus fulvus</i>          | No   | N/A      | N/A      | N/A                 | N/A               | N/A                     |                                 | [64]                  |                                                                             |
| Caryophylliidae  | <i>Polycyathus furanaensis</i>     | No   | N/A      | N/A      | N/A                 | N/A               | N/A                     |                                 | [64]                  |                                                                             |
| Caryophylliidae  | <i>Polycyathus fuscomarginatus</i> | No   | N/A      | N/A      | N/A                 | N/A               | N/A                     |                                 | [64]                  |                                                                             |
| Caryophylliidae  | <i>Polycyathus hodgsoni</i>        | No   | N/A      | N/A      | N/A                 | N/A               | N/A                     |                                 | [64]                  |                                                                             |
| Caryophylliidae  | <i>Polycyathus hondaensis</i>      | No   | N/A      | N/A      | N/A                 | N/A               | N/A                     |                                 | [64]                  |                                                                             |
| Caryophylliidae  | <i>Polycyathus isabela</i>         | No   | VU       | N/A      | N/A                 | N/A               | N/A                     |                                 | [64]                  |                                                                             |
| Caryophylliidae  | <i>Polycyathus marigondoni</i>     | No   | N/A      | N/A      | N/A                 | N/A               | N/A                     |                                 | [64]                  |                                                                             |
| Caryophylliidae  | <i>Polycyathus mayae</i>           | No   | N/A      | N/A      | N/A                 | N/A               | N/A                     |                                 | [64]                  |                                                                             |
| Caryophylliidae  | <i>Polycyathus muelleriae</i>      | No   | N/A      | N/A      | N/A                 | N/A               | N/A                     | 12S: EF597026;<br>16S: AF265606 | [64]                  |                                                                             |
| Caryophylliidae  | <i>Polycyathus norfolkensis</i>    | No   | N/A      | N/A      | N/A                 | N/A               | N/A                     |                                 | [64]                  |                                                                             |
| Caryophylliidae  | <i>Polycyathus octuplus</i>        | No   | N/A      | N/A      | N/A                 | N/A               | N/A                     |                                 | [64]                  |                                                                             |
| Caryophylliidae  | <i>Polycyathus palifera</i>        | No   | N/A      | N/A      | N/A                 | N/A               | N/A                     |                                 | [64]                  |                                                                             |
| Caryophylliidae  | <i>Polycyathus persicus</i>        | No   | N/A      | N/A      | N/A                 | N/A               | N/A                     |                                 | [64]                  |                                                                             |
| Caryophylliidae  | <i>Polycyathus senegalensis</i>    | No   | N/A      | N/A      | N/A                 | N/A               | N/A                     |                                 | [64]                  |                                                                             |
| Caryophylliidae  | <i>Polycyathus verrilli</i>        | No   | N/A      | N/A      | N/A                 | N/A               | N/A                     |                                 | [64]                  |                                                                             |
| Caryophylliidae  | <i>Premocyathus cornuformis</i>    | No   | N/A      | N/A      | N/A                 | N/A               | N/A                     |                                 | [68]                  | Revised from <i>Caryophyllia cornuformis</i>                                |
| Caryophylliidae  | <i>Rhizosmilia maculata</i>        | No   | N/A      | N/A      | N/A                 | N/A               | N/A                     | 12S: EF597023;<br>16S: AF265602 | [68]                  |                                                                             |
| Caryophylliidae  | <i>Rhizosmilia robusta</i>         | No   | N/A      | N/A      | N/A                 | N/A               | N/A                     | COI: HM018664                   |                       |                                                                             |
| Caryophylliidae  | <i>Solenosmilia variabilis</i>     | No   | N/A      | N/A      | N/A                 | N/A               | N/A                     | 16S: HM015348                   |                       |                                                                             |
| Caryophylliidae  | <i>Stephanocyathus platypus</i>    | No   | N/A      | N/A      | N/A                 | N/A               | N/A                     | 16S: HM015352                   |                       |                                                                             |
| Caryophylliidae  | <i>Stephanocyathus spiniger</i>    | No   | N/A      | N/A      | N/A                 | N/A               | N/A                     | 16S: HM015359;<br>COI: HM018665 |                       |                                                                             |
| Caryophylliidae  | <i>Stephanocyathus weberianus</i>  | No   | N/A      | N/A      | N/A                 | N/A               | N/A                     | 16S: AF265594                   |                       |                                                                             |
| Caryophylliidae  | <i>Tethocyathus virgatus</i>       | No   | N/A      | N/A      | N/A                 | N/A               | N/A                     | 16S: FJ788131                   |                       |                                                                             |
| Caryophylliidae  | <i>Thalamophyllia gasti</i>        | No   | N/A      | N/A      | N/A                 | N/A               | N/A                     | 12S: EF597086;<br>16S: AF265590 | [64]                  |                                                                             |
| Caryophylliidae  | <i>Thalamophyllia gomberti</i>     | No   | N/A      | N/A      | N/A                 | N/A               | N/A                     |                                 | [64]                  |                                                                             |
| Caryophylliidae  | <i>Thalamophyllia riisei</i>       | No   | N/A      | N/A      | N/A                 | N/A               | N/A                     | 12S: EF597087                   | [64]                  |                                                                             |
| Caryophylliidae  | <i>Thalamophyllia tenuescens</i>   | No   | N/A      | N/A      | N/A                 | N/A               | N/A                     |                                 | [64]                  |                                                                             |
| Caryophylliidae  | <i>Trochocyathus efateensis</i>    | No   | N/A      | N/A      | N/A                 | N/A               | N/A                     | 16S: FJ788132;<br>COI: HM018667 |                       |                                                                             |
| Caryophylliidae  | <i>Trochocyathus rhombocolumna</i> | No   | N/A      | N/A      | N/A                 | N/A               | N/A                     | COI: HM018668                   |                       |                                                                             |
| Caryophylliidae  | <i>Vaughanella concinna</i>        | No   | N/A      | N/A      | N/A                 | N/A               | N/A                     |                                 | [64]                  |                                                                             |
| Caryophylliidae  | <i>Vaughanella margaritata</i>     | No   | N/A      | N/A      | N/A                 | N/A               | N/A                     | 16S: AF265595                   | [64]                  | <i>Vaughanella</i> sp. in GenBank; terminal branch shared with conspecifics |
| Caryophylliidae  | <i>Vaughanella multipalifera</i>   | No   | N/A      | N/A      | N/A                 | N/A               | N/A                     |                                 | [64]                  |                                                                             |
| Caryophylliidae  | <i>Vaughanella oreophila</i>       | No   | N/A      | N/A      | N/A                 | N/A               | N/A                     |                                 | [64]                  |                                                                             |
| Dendrophylliidae | <i>Astroides calycularis</i>       | No   | N/A      | N/A      | N/A                 | N/A               | N/A                     |                                 | [63]                  |                                                                             |
| Dendrophylliidae | <i>Balanophyllia bairdiana</i>     | No   | N/A      | N/A      | N/A                 | N/A               | N/A                     |                                 | [63,64]               |                                                                             |
| Dendrophylliidae | <i>Balanophyllia bayeri</i>        | No   | N/A      | N/A      | N/A                 | N/A               | N/A                     |                                 | [63,64]               |                                                                             |

| Family           | Species                               | Reef List | Red List | EoE rank | EDGE rank (IUCN100) | EDGE rank (Isaac) | EDGE rank (Pessimistic) | Molecular sources               | Morphological sources | Remarks                          |
|------------------|---------------------------------------|-----------|----------|----------|---------------------|-------------------|-------------------------|---------------------------------|-----------------------|----------------------------------|
| Dendrophylliidae | <i>Balanophyllia bonaespei</i>        | No        | N/A      | N/A      | N/A                 | N/A               | N/A                     |                                 | [63,64]               |                                  |
| Dendrophylliidae | <i>Balanophyllia capensis</i>         | No        | N/A      | N/A      | N/A                 | N/A               | N/A                     |                                 | [63,64]               |                                  |
| Dendrophylliidae | <i>Balanophyllia caribbeana</i>       | No        | N/A      | N/A      | N/A                 | N/A               | N/A                     |                                 | [63,64]               | <i>Balanophyllia (Eupsammia)</i> |
| Dendrophylliidae | <i>Balanophyllia carinata</i>         | No        | N/A      | N/A      | N/A                 | N/A               | N/A                     |                                 | [63,64]               | <i>Balanophyllia (Eupsammia)</i> |
| Dendrophylliidae | <i>Balanophyllia cedrosensis</i>      | No        | N/A      | N/A      | N/A                 | N/A               | N/A                     |                                 | [63,64]               |                                  |
| Dendrophylliidae | <i>Balanophyllia cellulosa</i>        | No        | N/A      | N/A      | N/A                 | N/A               | N/A                     |                                 | [63,64]               |                                  |
| Dendrophylliidae | <i>Balanophyllia chnous</i>           | No        | N/A      | N/A      | N/A                 | N/A               | N/A                     |                                 | [63,64]               |                                  |
| Dendrophylliidae | <i>Balanophyllia corniculans</i>      | No        | N/A      | N/A      | N/A                 | N/A               | N/A                     |                                 | [63,64]               |                                  |
| Dendrophylliidae | <i>Balanophyllia cornu</i>            | No        | N/A      | N/A      | N/A                 | N/A               | N/A                     | COI: HM018605                   | [63,64]               |                                  |
| Dendrophylliidae | <i>Balanophyllia crassiseptum</i>     | No        | N/A      | N/A      | N/A                 | N/A               | N/A                     |                                 | [63,64]               |                                  |
| Dendrophylliidae | <i>Balanophyllia crassitheca</i>      | No        | N/A      | N/A      | N/A                 | N/A               | N/A                     |                                 | [63,64]               |                                  |
| Dendrophylliidae | <i>Balanophyllia cumingii</i>         | No        | N/A      | N/A      | N/A                 | N/A               | N/A                     |                                 | [63,64]               |                                  |
| Dendrophylliidae | <i>Balanophyllia cyathoides</i>       | No        | N/A      | N/A      | N/A                 | N/A               | N/A                     |                                 | [63,64]               |                                  |
| Dendrophylliidae | <i>Balanophyllia dentata</i>          | No        | N/A      | N/A      | N/A                 | N/A               | N/A                     |                                 | [63,64]               |                                  |
| Dendrophylliidae | <i>Balanophyllia desmophyllioides</i> | No        | N/A      | N/A      | N/A                 | N/A               | N/A                     | COI: HM018607                   | [63,64]               |                                  |
| Dendrophylliidae | <i>Balanophyllia diademata</i>        | No        | N/A      | N/A      | N/A                 | N/A               | N/A                     |                                 | [63,64]               |                                  |
| Dendrophylliidae | <i>Balanophyllia diffusa</i>          | No        | N/A      | N/A      | N/A                 | N/A               | N/A                     |                                 | [63,64]               |                                  |
| Dendrophylliidae | <i>Balanophyllia dilatata</i>         | No        | N/A      | N/A      | N/A                 | N/A               | N/A                     |                                 | [63,64]               |                                  |
| Dendrophylliidae | <i>Balanophyllia dineta</i>           | No        | N/A      | N/A      | N/A                 | N/A               | N/A                     |                                 | [63,64]               |                                  |
| Dendrophylliidae | <i>Balanophyllia diomedea</i>         | No        | N/A      | N/A      | N/A                 | N/A               | N/A                     |                                 | [63,64]               |                                  |
| Dendrophylliidae | <i>Balanophyllia dubia</i>            | No        | N/A      | N/A      | N/A                 | N/A               | N/A                     |                                 | [63,64]               |                                  |
| Dendrophylliidae | <i>Balanophyllia elegans</i>          | No        | N/A      | N/A      | N/A                 | N/A               | N/A                     | COI: DQ445805                   | [63,64]               |                                  |
| Dendrophylliidae | <i>Balanophyllia europaea</i>         | Yes       | DD       | N/A      | 756                 | 836               | 836                     |                                 | [63,64,68]            |                                  |
| Dendrophylliidae | <i>Balanophyllia floridana</i>        | No        | N/A      | N/A      | N/A                 | N/A               | N/A                     |                                 | [63,64]               |                                  |
| Dendrophylliidae | <i>Balanophyllia galapagensis</i>     | No        | N/A      | N/A      | N/A                 | N/A               | N/A                     |                                 | [63,64]               |                                  |
| Dendrophylliidae | <i>Balanophyllia gemma</i>            | No        | N/A      | N/A      | N/A                 | N/A               | N/A                     |                                 | [63,64]               |                                  |
| Dendrophylliidae | <i>Balanophyllia gemmifera</i>        | No        | N/A      | N/A      | N/A                 | N/A               | N/A                     |                                 | [63,64]               |                                  |
| Dendrophylliidae | <i>Balanophyllia generatrix</i>       | No        | N/A      | N/A      | N/A                 | N/A               | N/A                     |                                 | [63,64]               |                                  |
| Dendrophylliidae | <i>Balanophyllia gigas</i>            | No        | N/A      | N/A      | N/A                 | N/A               | N/A                     |                                 | [63,64]               |                                  |
| Dendrophylliidae | <i>Balanophyllia hadros</i>           | No        | N/A      | N/A      | N/A                 | N/A               | N/A                     |                                 | [63,64]               |                                  |
| Dendrophylliidae | <i>Balanophyllia helenae</i>          | No        | N/A      | N/A      | N/A                 | N/A               | N/A                     |                                 | [63,64]               | <i>Balanophyllia (Eupsammia)</i> |
| Dendrophylliidae | <i>Balanophyllia imperialis</i>       | No        | N/A      | N/A      | N/A                 | N/A               | N/A                     |                                 | [63,64]               |                                  |
| Dendrophylliidae | <i>Balanophyllia iwayamaensis</i>     | No        | N/A      | N/A      | N/A                 | N/A               | N/A                     |                                 | [63,64]               |                                  |
| Dendrophylliidae | <i>Balanophyllia japonica</i>         | No        | N/A      | N/A      | N/A                 | N/A               | N/A                     |                                 | [63,64]               |                                  |
| Dendrophylliidae | <i>Balanophyllia kalakauai</i>        | No        | N/A      | N/A      | N/A                 | N/A               | N/A                     |                                 | [63,64]               |                                  |
| Dendrophylliidae | <i>Balanophyllia laysanensis</i>      | No        | N/A      | N/A      | N/A                 | N/A               | N/A                     |                                 | [63,64]               |                                  |
| Dendrophylliidae | <i>Balanophyllia malouinensis</i>     | No        | N/A      | N/A      | N/A                 | N/A               | N/A                     |                                 | [63,64]               |                                  |
| Dendrophylliidae | <i>Balanophyllia merguensis</i>       | No        | N/A      | N/A      | N/A                 | N/A               | N/A                     |                                 | [63,64]               |                                  |
| Dendrophylliidae | <i>Balanophyllia palifera</i>         | No        | N/A      | N/A      | N/A                 | N/A               | N/A                     |                                 | [63,64]               |                                  |
| Dendrophylliidae | <i>Balanophyllia parallela</i>        | No        | N/A      | N/A      | N/A                 | N/A               | N/A                     |                                 | [63,64]               |                                  |
| Dendrophylliidae | <i>Balanophyllia parvula</i>          | No        | N/A      | N/A      | N/A                 | N/A               | N/A                     |                                 | [63,64]               |                                  |
| Dendrophylliidae | <i>Balanophyllia pittieri</i>         | No        | N/A      | N/A      | N/A                 | N/A               | N/A                     |                                 | [63,64]               | <i>Balanophyllia (Eupsammia)</i> |
| Dendrophylliidae | <i>Balanophyllia profundicella</i>    | No        | N/A      | N/A      | N/A                 | N/A               | N/A                     |                                 | [63,64]               |                                  |
| Dendrophylliidae | <i>Balanophyllia rediviva</i>         | No        | N/A      | N/A      | N/A                 | N/A               | N/A                     |                                 | [63,64]               |                                  |
| Dendrophylliidae | <i>Balanophyllia regalis</i>          | No        | N/A      | N/A      | N/A                 | N/A               | N/A                     |                                 | [63,64]               | <i>Balanophyllia (Eupsammia)</i> |
| Dendrophylliidae | <i>Balanophyllia regia</i>            | No        | N/A      | N/A      | N/A                 | N/A               | N/A                     | 12S: EF597047;<br>16S: AF265587 | [63,64]               |                                  |
| Dendrophylliidae | <i>Balanophyllia scabra</i>           | No        | N/A      | N/A      | N/A                 | N/A               | N/A                     |                                 | [63,64]               |                                  |
| Dendrophylliidae | <i>Balanophyllia scabrosa</i>         | No        | N/A      | N/A      | N/A                 | N/A               | N/A                     |                                 | [63,64]               |                                  |
| Dendrophylliidae | <i>Balanophyllia serrata</i>          | No        | N/A      | N/A      | N/A                 | N/A               | N/A                     |                                 | [63,64]               |                                  |
| Dendrophylliidae | <i>Balanophyllia spongiosa</i>        | No        | N/A      | N/A      | N/A                 | N/A               | N/A                     |                                 | [63,64]               |                                  |
| Dendrophylliidae | <i>Balanophyllia stimpsonii</i>       | No        | N/A      | N/A      | N/A                 | N/A               | N/A                     |                                 | [63,64]               | <i>Balanophyllia (Eupsammia)</i> |
| Dendrophylliidae | <i>Balanophyllia striata</i>          | No        | N/A      | N/A      | N/A                 | N/A               | N/A                     |                                 | [63,64]               |                                  |

| Family           | Species                           | Reef List | Red List | EoE rank | EDGE rank (IUCN100) | EDGE rank (Isaac) | EDGE rank (Pessimistic) | Molecular sources               | Morphological sources | Remarks |
|------------------|-----------------------------------|-----------|----------|----------|---------------------|-------------------|-------------------------|---------------------------------|-----------------------|---------|
| Dendrophylliidae | <i>Balanophyllia taprobanae</i>   | No        | N/A      | N/A      | N/A                 | N/A               | N/A                     |                                 | [63,64]               |         |
| Dendrophylliidae | <i>Balanophyllia tenuis</i>       | No        | N/A      | N/A      | N/A                 | N/A               | N/A                     |                                 | [63,64]               |         |
| Dendrophylliidae | <i>Balanophyllia thalassae</i>    | No        | N/A      | N/A      | N/A                 | N/A               | N/A                     |                                 | [63,64]               |         |
| Dendrophylliidae | <i>Balanophyllia vanderhorsti</i> | No        | N/A      | N/A      | N/A                 | N/A               | N/A                     |                                 | [63,64]               |         |
| Dendrophylliidae | <i>Balanophyllia wellsii</i>      | No        | N/A      | N/A      | N/A                 | N/A               | N/A                     |                                 | [63,64]               |         |
| Dendrophylliidae | <i>Balanophyllia yongei</i>       | No        | N/A      | N/A      | N/A                 | N/A               | N/A                     |                                 | [63,64]               |         |
| Dendrophylliidae | <i>Bathypsammia falloscoialis</i> | No        | N/A      | N/A      | N/A                 | N/A               | N/A                     |                                 | [63]                  |         |
| Dendrophylliidae | <i>Bathypsammia tintinnabulum</i> | No        | N/A      | N/A      | N/A                 | N/A               | N/A                     |                                 | [63]                  |         |
| Dendrophylliidae | <i>Cladopsammia echinata</i>      | No        | N/A      | N/A      | N/A                 | N/A               | N/A                     |                                 | [63]                  |         |
| Dendrophylliidae | <i>Cladopsammia eguchii</i>       | No        | N/A      | N/A      | N/A                 | N/A               | N/A                     | 12S: EF597049;<br>16S: AF265588 | [63]                  |         |
| Dendrophylliidae | <i>Cladopsammia gracilis</i>      | No        | N/A      | N/A      | N/A                 | N/A               | N/A                     |                                 | [63]                  |         |
| Dendrophylliidae | <i>Cladopsammia manuelensis</i>   | No        | N/A      | N/A      | N/A                 | N/A               | N/A                     |                                 | [63]                  |         |
| Dendrophylliidae | <i>Cladopsammia rolandi</i>       | No        | N/A      | N/A      | N/A                 | N/A               | N/A                     |                                 | [63]                  |         |
| Dendrophylliidae | <i>Cladopsammia willeyi</i>       | No        | N/A      | N/A      | N/A                 | N/A               | N/A                     |                                 | [63]                  |         |
| Dendrophylliidae | <i>Dendrophyllia aculeata</i>     | No        | N/A      | N/A      | N/A                 | N/A               | N/A                     |                                 | [63]                  |         |
| Dendrophylliidae | <i>Dendrophyllia alcocki</i>      | No        | N/A      | N/A      | N/A                 | N/A               | N/A                     | 16S: AF550366                   | [63]                  |         |
| Dendrophylliidae | <i>Dendrophyllia alternata</i>    | No        | N/A      | N/A      | N/A                 | N/A               | N/A                     |                                 | [63]                  |         |
| Dendrophylliidae | <i>Dendrophyllia arbuscula</i>    | No        | N/A      | N/A      | N/A                 | N/A               | N/A                     |                                 | [63]                  |         |
| Dendrophylliidae | <i>Dendrophyllia boschmai</i>     | No        | N/A      | N/A      | N/A                 | N/A               | N/A                     |                                 | [63]                  |         |
| Dendrophylliidae | <i>Dendrophyllia californica</i>  | No        | N/A      | N/A      | N/A                 | N/A               | N/A                     |                                 | [63]                  |         |
| Dendrophylliidae | <i>Dendrophyllia carleenae</i>    | No        | N/A      | N/A      | N/A                 | N/A               | N/A                     |                                 | [63]                  |         |
| Dendrophylliidae | <i>Dendrophyllia cecilliana</i>   | No        | N/A      | N/A      | N/A                 | N/A               | N/A                     |                                 | [63]                  |         |
| Dendrophylliidae | <i>Dendrophyllia cladonia</i>     | No        | N/A      | N/A      | N/A                 | N/A               | N/A                     |                                 | [63]                  |         |
| Dendrophylliidae | <i>Dendrophyllia cornigera</i>    | No        | N/A      | N/A      | N/A                 | N/A               | N/A                     |                                 | [63]                  |         |
| Dendrophylliidae | <i>Dendrophyllia cribrosa</i>     | No        | N/A      | N/A      | N/A                 | N/A               | N/A                     |                                 | [63]                  |         |
| Dendrophylliidae | <i>Dendrophyllia dilatata</i>     | No        | N/A      | N/A      | N/A                 | N/A               | N/A                     |                                 | [63]                  |         |
| Dendrophylliidae | <i>Dendrophyllia florulenta</i>   | No        | N/A      | N/A      | N/A                 | N/A               | N/A                     |                                 | [63]                  |         |
| Dendrophylliidae | <i>Dendrophyllia fotojiku</i>     | No        | N/A      | N/A      | N/A                 | N/A               | N/A                     |                                 | [63]                  |         |
| Dendrophylliidae | <i>Dendrophyllia granosa</i>      | No        | N/A      | N/A      | N/A                 | N/A               | N/A                     |                                 | [63]                  |         |
| Dendrophylliidae | <i>Dendrophyllia ijimai</i>       | No        | N/A      | N/A      | N/A                 | N/A               | N/A                     |                                 | [63]                  |         |
| Dendrophylliidae | <i>Dendrophyllia incisa</i>       | No        | N/A      | N/A      | N/A                 | N/A               | N/A                     |                                 | [63]                  |         |
| Dendrophylliidae | <i>Dendrophyllia indica</i>       | No        | N/A      | N/A      | N/A                 | N/A               | N/A                     |                                 | [63]                  |         |
| Dendrophylliidae | <i>Dendrophyllia johnsoni</i>     | No        | DD       | N/A      | N/A                 | N/A               | N/A                     |                                 | [63]                  |         |
| Dendrophylliidae | <i>Dendrophyllia laboreli</i>     | No        | N/A      | N/A      | N/A                 | N/A               | N/A                     |                                 | [63]                  |         |
| Dendrophylliidae | <i>Dendrophyllia minima</i>       | No        | N/A      | N/A      | N/A                 | N/A               | N/A                     |                                 | [63]                  |         |
| Dendrophylliidae | <i>Dendrophyllia minuscula</i>    | No        | N/A      | N/A      | N/A                 | N/A               | N/A                     |                                 | [63]                  |         |
| Dendrophylliidae | <i>Dendrophyllia oldroydae</i>    | No        | N/A      | N/A      | N/A                 | N/A               | N/A                     |                                 | [63]                  |         |
| Dendrophylliidae | <i>Dendrophyllia paragracilis</i> | No        | N/A      | N/A      | N/A                 | N/A               | N/A                     |                                 | [63]                  |         |
| Dendrophylliidae | <i>Dendrophyllia radians</i>      | No        | N/A      | N/A      | N/A                 | N/A               | N/A                     |                                 | [63]                  |         |
| Dendrophylliidae | <i>Dendrophyllia ramea</i>        | No        | N/A      | N/A      | N/A                 | N/A               | N/A                     |                                 | [63]                  |         |
| Dendrophylliidae | <i>Dendrophyllia robusta</i>      | No        | N/A      | N/A      | N/A                 | N/A               | N/A                     |                                 | [63]                  |         |
| Dendrophylliidae | <i>Dendrophyllia suprabuscula</i> | No        | N/A      | N/A      | N/A                 | N/A               | N/A                     |                                 | [63]                  |         |
| Dendrophylliidae | <i>Dendrophyllia velata</i>       | No        | N/A      | N/A      | N/A                 | N/A               | N/A                     |                                 | [63]                  |         |
| Dendrophylliidae | <i>Dichopsammia granulosa</i>     | No        | N/A      | N/A      | N/A                 | N/A               | N/A                     |                                 | [63]                  |         |
| Dendrophylliidae | <i>Duncanopsammia axifuga</i>     | Yes       | NT       | N/A      | 445                 | 603               | 603                     |                                 | [63]                  |         |
| Dendrophylliidae | <i>Eguchipsammia cornucopia</i>   | No        | N/A      | N/A      | N/A                 | N/A               | N/A                     |                                 | [63]                  |         |
| Dendrophylliidae | <i>Eguchipsammia fistula</i>      | No        | N/A      | N/A      | N/A                 | N/A               | N/A                     |                                 | [63]                  |         |
| Dendrophylliidae | <i>Eguchipsammia gaditana</i>     | No        | N/A      | N/A      | N/A                 | N/A               | N/A                     |                                 | [63]                  |         |
| Dendrophylliidae | <i>Eguchipsammia japonica</i>     | No        | N/A      | N/A      | N/A                 | N/A               | N/A                     |                                 | [63]                  |         |

| Family           | Species                           | Reef | Red List | EoE rank | EDGE rank (IUCN100) | EDGE rank (Isaac) | EDGE rank (Pessimistic) | Molecular sources                               | Morphological sources | Remarks                                                                       |
|------------------|-----------------------------------|------|----------|----------|---------------------|-------------------|-------------------------|-------------------------------------------------|-----------------------|-------------------------------------------------------------------------------|
| Dendrophylliidae | <i>Eguchipsammia serpentina</i>   | No   | N/A      | N/A      | N/A                 | N/A               | N/A                     |                                                 | [63]                  |                                                                               |
| Dendrophylliidae | <i>Eguchipsammia strigosa</i>     | No   | N/A      | N/A      | N/A                 | N/A               | N/A                     |                                                 | [63]                  |                                                                               |
| Dendrophylliidae | <i>Eguchipsammia wellsii</i>      | No   | N/A      | N/A      | N/A                 | N/A               | N/A                     |                                                 | [63]                  |                                                                               |
| Dendrophylliidae | <i>Enallopsammia profunda</i>     | No   | N/A      | N/A      | N/A                 | N/A               | N/A                     |                                                 | [63,64]               |                                                                               |
| Dendrophylliidae | <i>Enallopsammia pusilla</i>      | No   | N/A      | N/A      | N/A                 | N/A               | N/A                     |                                                 | [63,64]               |                                                                               |
| Dendrophylliidae | <i>Enallopsammia rostrata</i>     | No   | N/A      | N/A      | N/A                 | N/A               | N/A                     | 16S: U40294;<br>COI: HM018632                   | [63,64]               |                                                                               |
| Dendrophylliidae | <i>Endopachys bulbosa</i>         | No   | N/A      | N/A      | N/A                 | N/A               | N/A                     |                                                 | [63]                  |                                                                               |
| Dendrophylliidae | <i>Endopachys grayi</i>           | No   | N/A      | N/A      | N/A                 | N/A               | N/A                     |                                                 | [63]                  |                                                                               |
| Dendrophylliidae | <i>Endopsammia philippensis</i>   | No   | N/A      | N/A      | N/A                 | N/A               | N/A                     |                                                 | [63]                  |                                                                               |
| Dendrophylliidae | <i>Endopsammia pourtalesi</i>     | No   | DD       | N/A      | N/A                 | N/A               | N/A                     |                                                 | [63]                  |                                                                               |
| Dendrophylliidae | <i>Endopsammia regularis</i>      | No   | N/A      | N/A      | N/A                 | N/A               | N/A                     |                                                 | [63]                  |                                                                               |
| Dendrophylliidae | <i>Heteropsammia cochleata</i>    | Yes  | LC       | N/A      | 837                 | 837               | 837                     | 12S: EF597050                                   | [63]                  | <i>Heteropsammia</i> sp. in GenBank; terminal branch shared with conspecifics |
| Dendrophylliidae | <i>Heteropsammia eupsammides</i>  | Yes  | NT       | N/A      | 670                 | 832               | 832                     |                                                 | [63]                  |                                                                               |
| Dendrophylliidae | <i>Heteropsammia moretonensis</i> | No   | N/A      | N/A      | N/A                 | N/A               | N/A                     |                                                 | [63]                  |                                                                               |
| Dendrophylliidae | <i>Leptopsammia britannica</i>    | No   | N/A      | N/A      | N/A                 | N/A               | N/A                     |                                                 | [63,64]               |                                                                               |
| Dendrophylliidae | <i>Leptopsammia chevalieri</i>    | No   | N/A      | N/A      | N/A                 | N/A               | N/A                     |                                                 | [63,64]               |                                                                               |
| Dendrophylliidae | <i>Leptopsammia columna</i>       | No   | N/A      | N/A      | N/A                 | N/A               | N/A                     |                                                 | [63,64]               |                                                                               |
| Dendrophylliidae | <i>Leptopsammia crassa</i>        | No   | N/A      | N/A      | N/A                 | N/A               | N/A                     |                                                 | [63,64]               |                                                                               |
| Dendrophylliidae | <i>Leptopsammia formosa</i>       | No   | N/A      | N/A      | N/A                 | N/A               | N/A                     |                                                 | [63,64]               |                                                                               |
| Dendrophylliidae | <i>Leptopsammia poculum</i>       | No   | N/A      | N/A      | N/A                 | N/A               | N/A                     |                                                 | [63,64]               |                                                                               |
| Dendrophylliidae | <i>Leptopsammia pruvoti</i>       | No   | N/A      | N/A      | N/A                 | N/A               | N/A                     | 12S: EF597068;<br>16S: AF265579                 | [63,64]               |                                                                               |
| Dendrophylliidae | <i>Leptopsammia queenslandiae</i> | No   | N/A      | N/A      | N/A                 | N/A               | N/A                     |                                                 | [63,64]               |                                                                               |
| Dendrophylliidae | <i>Leptopsammia stokesiana</i>    | No   | N/A      | N/A      | N/A                 | N/A               | N/A                     |                                                 | [63,64]               |                                                                               |
| Dendrophylliidae | <i>Leptopsammia trinitatis</i>    | No   | N/A      | N/A      | N/A                 | N/A               | N/A                     |                                                 | [63,64]               |                                                                               |
| Dendrophylliidae | <i>Notophyllia etheridgi</i>      | No   | N/A      | N/A      | N/A                 | N/A               | N/A                     |                                                 | [63]                  |                                                                               |
| Dendrophylliidae | <i>Notophyllia hecki</i>          | No   | N/A      | N/A      | N/A                 | N/A               | N/A                     |                                                 | [63]                  |                                                                               |
| Dendrophylliidae | <i>Notophyllia piscacauda</i>     | No   | N/A      | N/A      | N/A                 | N/A               | N/A                     |                                                 | [63]                  |                                                                               |
| Dendrophylliidae | <i>Notophyllia recta</i>          | No   | N/A      | N/A      | N/A                 | N/A               | N/A                     |                                                 | [63]                  |                                                                               |
| Dendrophylliidae | <i>Pourtalopsammia togata</i>     | No   | N/A      | N/A      | N/A                 | N/A               | N/A                     |                                                 | [63]                  |                                                                               |
| Dendrophylliidae | <i>Rhizopsammia annae</i>         | No   | N/A      | N/A      | N/A                 | N/A               | N/A                     |                                                 | [63,64]               |                                                                               |
| Dendrophylliidae | <i>Rhizopsammia bermudensis</i>   | No   | N/A      | N/A      | N/A                 | N/A               | N/A                     |                                                 | [63,64]               |                                                                               |
| Dendrophylliidae | <i>Rhizopsammia compacta</i>      | No   | N/A      | N/A      | N/A                 | N/A               | N/A                     |                                                 | [63,64]               |                                                                               |
| Dendrophylliidae | <i>Rhizopsammia goesii</i>        | No   | N/A      | N/A      | N/A                 | N/A               | N/A                     |                                                 | [63,64]               |                                                                               |
| Dendrophylliidae | <i>Rhizopsammia minuta</i>        | No   | N/A      | N/A      | N/A                 | N/A               | N/A                     |                                                 | [63,64]               |                                                                               |
| Dendrophylliidae | <i>Rhizopsammia nuda</i>          | No   | N/A      | N/A      | N/A                 | N/A               | N/A                     |                                                 | [63,64]               |                                                                               |
| Dendrophylliidae | <i>Rhizopsammia pulchra</i>       | No   | N/A      | N/A      | N/A                 | N/A               | N/A                     |                                                 | [63,64]               |                                                                               |
| Dendrophylliidae | <i>Rhizopsammia verrilli</i>      | No   | N/A      | N/A      | N/A                 | N/A               | N/A                     |                                                 | [63,64]               |                                                                               |
| Dendrophylliidae | <i>Rhizopsammia wellingtoni</i>   | No   | CR       | N/A      | N/A                 | N/A               | N/A                     |                                                 | [63,64]               |                                                                               |
| Dendrophylliidae | <i>Rhizopsammia wetsteini</i>     | No   | N/A      | N/A      | N/A                 | N/A               | N/A                     |                                                 | [63,64]               |                                                                               |
| Dendrophylliidae | <i>Thecopsammia elongata</i>      | No   | N/A      | N/A      | N/A                 | N/A               | N/A                     |                                                 | [63]                  |                                                                               |
| Dendrophylliidae | <i>Thecopsammia socialis</i>      | No   | N/A      | N/A      | N/A                 | N/A               | N/A                     |                                                 | [63]                  |                                                                               |
| Dendrophylliidae | <i>Trochopsammia infundibulum</i> | No   | N/A      | N/A      | N/A                 | N/A               | N/A                     |                                                 | [63]                  |                                                                               |
| Dendrophylliidae | <i>Tabastraea coccinea</i>        | No   | N/A      | N/A      | N/A                 | N/A               | N/A                     | 12S: EF597045;<br>16S: L76022;<br>COI: DQ445806 | [63,64]               |                                                                               |
| Dendrophylliidae | <i>Tabastraea diaphana</i>        | No   | N/A      | N/A      | N/A                 | N/A               | N/A                     |                                                 | [63,64]               |                                                                               |
| Dendrophylliidae | <i>Tabastraea faulkneri</i>       | No   | N/A      | N/A      | N/A                 | N/A               | N/A                     |                                                 | [63,64]               |                                                                               |
| Dendrophylliidae | <i>Tabastraea floreana</i>        | No   | CR       | N/A      | N/A                 | N/A               | N/A                     |                                                 | [63,64]               |                                                                               |
| Dendrophylliidae | <i>Tabastraea micranthus</i>      | No   | N/A      | N/A      | N/A                 | N/A               | N/A                     |                                                 | [63,64]               |                                                                               |
| Dendrophylliidae | <i>Tabastraea tagusensis</i>      | No   | N/A      | N/A      | N/A                 | N/A               | N/A                     |                                                 | [63,64]               |                                                                               |
| Dendrophylliidae | <i>Turbinaria bifrons</i>         | Yes  | VU       | N/A      | 179                 | 410               | 402                     |                                                 | [63,64]               |                                                                               |
| Dendrophylliidae | <i>Turbinaria conspicua</i>       | Yes  | LC       | N/A      | 805                 | 750               | 750                     |                                                 | [63,64]               |                                                                               |
| Dendrophylliidae | <i>Turbinaria crater</i>          | Yes  | DD       | N/A      | 547                 | 667               | 667                     |                                                 | [63,64]               | Previously excluded [11]                                                      |
| Dendrophylliidae | <i>Turbinaria frondens</i>        | Yes  | LC       | N/A      | 805                 | 750               | 750                     |                                                 | [63,64]               |                                                                               |
| Dendrophylliidae | <i>Turbinaria heronensis</i>      | Yes  | VU       | N/A      | 179                 | 410               | 402                     |                                                 | [63,64]               |                                                                               |
| Dendrophylliidae | <i>Turbinaria irregularis</i>     | Yes  | LC       | N/A      | 805                 | 750               | 750                     |                                                 | [63,64]               |                                                                               |

| Family           | Species                           | Reef List | Red List | EoE rank | EDGE rank (IUCN100) | EDGE rank (Isaac) | EDGE rank (Pessimistic) | Molecular sources                                                                                       | Morphological sources | Remarks                                                                         |
|------------------|-----------------------------------|-----------|----------|----------|---------------------|-------------------|-------------------------|---------------------------------------------------------------------------------------------------------|-----------------------|---------------------------------------------------------------------------------|
| Dendrophylliidae | <i>Turbinaria mesenterina</i>     | Yes       | VU       | N/A      | 179                 | 410               | 402                     |                                                                                                         | [63,64]               |                                                                                 |
| Dendrophylliidae | <i>Turbinaria patula</i>          | Yes       | VU       | N/A      | 179                 | 410               | 402                     |                                                                                                         | [63,64]               |                                                                                 |
| Dendrophylliidae | <i>Turbinaria peltata</i>         | Yes       | VU       | N/A      | 34                  | 30                | 24                      | 12S: EF597044;<br>COI: AB441240;<br>CYB: AB441325                                                       | [63,64]               |                                                                                 |
| Dendrophylliidae | <i>Turbinaria radicalis</i>       | Yes       | NT       | N/A      | 454                 | 634               | 634                     |                                                                                                         | [63,64]               |                                                                                 |
| Dendrophylliidae | <i>Turbinaria reniformis</i>      | Yes       | VU       | N/A      | 179                 | 410               | 402                     |                                                                                                         | [63,64]               |                                                                                 |
| Dendrophylliidae | <i>Turbinaria stellulata</i>      | Yes       | VU       | N/A      | 179                 | 410               | 402                     |                                                                                                         | [63,64]               |                                                                                 |
| Euphyllidae      | <i>Catalaphyllia jardinei</i>     | Yes       | VU       | 6        | 53                  | 65                | 60                      | 12S: EF596997;<br>16S: L76000                                                                           | [64]                  |                                                                                 |
| Euphyllidae      | <i>Euphyllia ancora</i>           | Yes       | VU       | N/A      | 41                  | 43                | 38                      | 12S: JF825139;<br>16S: JF825139;<br>AT6: JF825139;<br>COI: JF825139;<br>CYB: JF825139;<br>ND5: JF825139 |                       |                                                                                 |
| Euphyllidae      | <i>Euphyllia cristata</i>         | Yes       | VU       | N/A      | 62                  | 78                | 73                      |                                                                                                         |                       | Closest to <i>E. glabrescens</i> [74]                                           |
| Euphyllidae      | <i>Euphyllia divisa</i>           | Yes       | NT       | N/A      | 202                 | 106               | 99                      | COI: AB441203;<br>CYB: AB441288                                                                         |                       |                                                                                 |
| Euphyllidae      | <i>Euphyllia glabrescens</i>      | Yes       | NT       | N/A      | 196                 | 85                | 80                      | COI: AB441206;<br>CYB: AB441291                                                                         |                       |                                                                                 |
| Euphyllidae      | <i>Euphyllia paraancora</i>       | Yes       | VU       | N/A      | 43                  | 45                | 40                      |                                                                                                         |                       | Closest to <i>E. ancora</i> & <i>E. divisa</i> [83]                             |
| Euphyllidae      | <i>Euphyllia paradivisa</i>       | Yes       | VU       | N/A      | 62                  | 78                | 73                      |                                                                                                         |                       | Closest to <i>E. glabrescens</i> [91]                                           |
| Euphyllidae      | <i>Euphyllia paraglabrescens</i>  | Yes       | VU       | N/A      | 62                  | 78                | 73                      |                                                                                                         |                       | Closest to <i>E. glabrescens</i> [83]                                           |
| Euphyllidae      | <i>Euphyllia yaeyamaensis</i>     | Yes       | NT       | N/A      | 255                 | 141               | 131                     |                                                                                                         |                       | Closest to <i>E. divisa</i> [92]                                                |
| Euphyllidae      | <i>Nemanzophyllia turbida</i>     | Yes       | VU       | N/A      | 29                  | 20                | 14                      |                                                                                                         |                       | Closest to <i>Pterogyra</i> [90]                                                |
| Euphyllidae      | <i>Physogyra lichtensteini</i>    | Yes       | VU       | 8        | 27                  | 18                | 12                      | 12S: EF597030;<br>COI: AB289562;<br>CYB: AB289564                                                       | [68]                  |                                                                                 |
| Euphyllidae      | <i>Pterogyra cauliformis</i>      | Yes       | DD       | N/A      | 270                 | 108               | 100                     |                                                                                                         |                       | <i>Pterogyra</i> monophyly assumed; closest to <i>P. simplex</i> [77]           |
| Euphyllidae      | <i>Pterogyra diabolotus</i>       | Yes       | DD       | N/A      | 270                 | 108               | 100                     |                                                                                                         |                       | <i>Pterogyra</i> monophyly assumed                                              |
| Euphyllidae      | <i>Pterogyra discus</i>           | Yes       | VU       | N/A      | 28                  | 19                | 13                      |                                                                                                         |                       | <i>Pterogyra</i> monophyly assumed; closest to <i>P. sinuosa</i> [93]           |
| Euphyllidae      | <i>Pterogyra multilobata</i>      | Yes       | DD       | N/A      | 270                 | 108               | 100                     |                                                                                                         |                       | <i>Pterogyra</i> monophyly assumed; closest to <i>P. diabolotus</i> [77]        |
| Euphyllidae      | <i>Pterogyra simplex</i>          | Yes       | NT       | N/A      | 185                 | 62                | 57                      |                                                                                                         |                       | <i>Pterogyra</i> monophyly assumed                                              |
| Euphyllidae      | <i>Pterogyra sinuosa</i>          | Yes       | NT       | N/A      | 185                 | 62                | 57                      | COI: HM018663                                                                                           |                       | <i>Pterogyra</i> sp. in GenBank; ancestral branch shared with conspecifics      |
| Faviidae         | <i>Australogyra zelli</i>         | Yes       | VU       | N/A      | 144                 | 267               | 265                     |                                                                                                         |                       | Closest to <i>Platygyra</i> [88]                                                |
| Faviidae         | <i>Barabattoia amicornum</i>      | Yes       | LC       | N/A      | 689                 | 539               | 539                     | COI: AB441193;<br>CYB: AB441278                                                                         |                       |                                                                                 |
| Faviidae         | <i>Barabattoia laddi</i>          | Yes       | VU       | N/A      | 101                 | 172               | 164                     |                                                                                                         |                       | Clade VII-B monophyly shown [81]; <i>Barabattoia</i> monophyly assumed          |
| Faviidae         | <i>Caulastraea comata</i>         | Yes       | VU       | N/A      | 111                 | 188               | 180                     |                                                                                                         |                       | Closest to <i>C. tumida</i> [92]                                                |
| Faviidae         | <i>Caulastraea curvata</i>        | Yes       | VU       | N/A      | 136                 | 236               | 233                     |                                                                                                         |                       | Closest to <i>C. furcata</i> [96]                                               |
| Faviidae         | <i>Caulastraea echinulata</i>     | Yes       | VU       | N/A      | 79                  | 99                | 92                      | COI: FJ345414                                                                                           |                       |                                                                                 |
| Faviidae         | <i>Caulastraea furcata</i>        | Yes       | LC       | N/A      | 745                 | 635               | 635                     | 12S: EF597035;<br>16S: L75997;<br>COI: AB117274;<br>CYB: AB117355                                       |                       |                                                                                 |
| Faviidae         | <i>Caulastraea tumida</i>         | Yes       | NT       | N/A      | 306                 | 282               | 280                     | COI: HQ203249                                                                                           |                       |                                                                                 |
| Faviidae         | <i>Cladocora arbuscula</i>        | Yes       | LC       | N/A      | 580                 | 388               | 380                     | COI: AB117292;<br>CYB: AB117377                                                                         | [64,68]               |                                                                                 |
| Faviidae         | <i>Cladocora caespitosa</i>       | Yes       | DD       | N/A      | 274                 | 117               | 108                     | 12S: EF597017;<br>16S: AF265612                                                                         | [64]                  |                                                                                 |
| Faviidae         | <i>Cladocora debilis</i>          | No        | N/A      | N/A      | N/A                 | N/A               | N/A                     |                                                                                                         | [64,68]               |                                                                                 |
| Faviidae         | <i>Cladocora pacifica</i>         | No        | N/A      | N/A      | N/A                 | N/A               | N/A                     |                                                                                                         | [64]                  |                                                                                 |
| Faviidae         | <i>Colpophyllia amaranthus</i>    | Yes       | DD       | N/A      | 368                 | 357               | 352                     |                                                                                                         | [61]                  | Previously excluded [11]                                                        |
| Faviidae         | <i>Colpophyllia breviserialis</i> | Yes       | DD       | N/A      | 368                 | 357               | 352                     |                                                                                                         | [61]                  | Previously excluded [11]                                                        |
| Faviidae         | <i>Colpophyllia natans</i>        | Yes       | LC       | N/A      | 666                 | 457               | 449                     | 12S: DQ643833;<br>16S: DQ643833;<br>AT6: DQ643833;<br>COI: DQ643833;<br>CYB: DQ643833                   | [61]                  |                                                                                 |
| Faviidae         | <i>Cyphastrea agassizi</i>        | Yes       | VU       | N/A      | 100                 | 171               | 163                     |                                                                                                         |                       | <i>Cyphastrea</i> monophyly shown [81]                                          |
| Faviidae         | <i>Cyphastrea chalcidicum</i>     | Yes       | LC       | N/A      | 420                 | 137               | 127                     | COI: AB117259;<br>CYB: AB117336                                                                         |                       |                                                                                 |
| Faviidae         | <i>Cyphastrea decadia</i>         | Yes       | LC       | N/A      | 687                 | 537               | 537                     |                                                                                                         |                       | <i>Cyphastrea</i> monophyly shown [81]; closest to <i>C. japonica</i> [85]      |
| Faviidae         | <i>Cyphastrea hexasepta</i>       | Yes       | VU       | N/A      | 42                  | 44                | 39                      |                                                                                                         |                       | <i>Cyphastrea</i> monophyly shown [81]; closest to <i>C. microphthalma</i> [93] |
| Faviidae         | <i>Cyphastrea japonica</i>        | Yes       | LC       | N/A      | 687                 | 537               | 537                     |                                                                                                         |                       | <i>Cyphastrea</i> monophyly shown [81]                                          |
| Faviidae         | <i>Cyphastrea microphthalma</i>   | Yes       | LC       | N/A      | 430                 | 152               | 142                     | COI: FJ345416                                                                                           |                       |                                                                                 |
| Faviidae         | <i>Cyphastrea ocellina</i>        | Yes       | VU       | N/A      | 96                  | 162               | 154                     | 12S: EF596996;<br>16S: L76132                                                                           |                       |                                                                                 |

| Family   | Species                          | Reef | Red List | EoE rank | EDGE rank (IUCN100) | EDGE rank (Isaac) | EDGE rank (Pessimistic) | Molecular sources                                                 | Morphological sources | Remarks                                                                        |
|----------|----------------------------------|------|----------|----------|---------------------|-------------------|-------------------------|-------------------------------------------------------------------|-----------------------|--------------------------------------------------------------------------------|
| Faviidae | <i>Cyphastrea serailia</i>       | Yes  | LC       | N/A      | 423                 | 142               | 132                     | COI: AB117258;<br>CYB: AB117334                                   |                       |                                                                                |
| Faviidae | <i>Diploastrea heliopora</i>     | Yes  | NT       | ED       | 167                 | 40                | 35                      | COI: AB117290;<br>CYB: AB117375                                   |                       |                                                                                |
| Faviidae | <i>Diploria clivosa</i>          | Yes  | LC       | N/A      | 667                 | 458               | 450                     | 12S: EF597001;<br>COI: AB117226;<br>CYB: AB117304                 | [61]                  |                                                                                |
| Faviidae | <i>Diploria labyrinthiformis</i> | Yes  | LC       | N/A      | 668                 | 459               | 451                     | 12S: EF597002;<br>COI: AB117224;<br>CYB: AB117302                 | [61]                  |                                                                                |
| Faviidae | <i>Diploria strigosa</i>         | Yes  | LC       | N/A      | 597                 | 424               | 416                     | 12S: EF597003;<br>COI: AB117225;<br>CYB: AB117303                 | [61]                  |                                                                                |
| Faviidae | <i>Echinopora ashmorensis</i>    | Yes  | VU       | N/A      | 115                 | 203               | 196                     |                                                                   |                       | <i>Echinopora</i> monophyly shown [81]; closest to <i>E. lamellosa</i> [91]    |
| Faviidae | <i>Echinopora forskaliana</i>    | Yes  | NT       | N/A      | 413                 | 528               | 528                     |                                                                   |                       | <i>Echinopora</i> monophyly shown [81]                                         |
| Faviidae | <i>Echinopora fruticulosa</i>    | Yes  | NT       | N/A      | 413                 | 528               | 528                     |                                                                   |                       | <i>Echinopora</i> monophyly shown [81]                                         |
| Faviidae | <i>Echinopora gemmacea</i>       | Yes  | LC       | N/A      | 456                 | 192               | 184                     | COI: AB117263;<br>CYB: AB117342                                   |                       |                                                                                |
| Faviidae | <i>Echinopora grandicula</i>     | Yes  | DD       | N/A      | 484                 | 631               | 631                     |                                                                   |                       | <i>Echinopora</i> monophyly shown [81]                                         |
| Faviidae | <i>Echinopora hirsutissima</i>   | Yes  | LC       | N/A      | 787                 | 707               | 707                     |                                                                   |                       | <i>Echinopora</i> monophyly shown [81]                                         |
| Faviidae | <i>Echinopora horrida</i>        | Yes  | NT       | N/A      | 165                 | 36                | 30                      | COI: HQ203253                                                     |                       |                                                                                |
| Faviidae | <i>Echinopora irregularis</i>    | Yes  | DD       | N/A      | 484                 | 631               | 631                     |                                                                   |                       | <i>Echinopora</i> monophyly shown [81]; closest to <i>E. hirsutissima</i> [93] |
| Faviidae | <i>Echinopora lamellosa</i>      | Yes  | LC       | N/A      | 584                 | 397               | 389                     | 16S: L76003;<br>COI: FJ345419                                     |                       |                                                                                |
| Faviidae | <i>Echinopora mammiformis</i>    | Yes  | NT       | N/A      | 193                 | 77                | 72                      | COI: HQ203254                                                     |                       |                                                                                |
| Faviidae | <i>Echinopora pacificus</i>      | Yes  | NT       | N/A      | 191                 | 76                | 71                      | COI: AB117262;<br>CYB: AB117341                                   |                       |                                                                                |
| Faviidae | <i>Echinopora robusta</i>        | Yes  | VU       | N/A      | 166                 | 334               | 332                     |                                                                   |                       | <i>Echinopora</i> monophyly shown [81]; closest to <i>E. forskaliana</i> [93]  |
| Faviidae | <i>Echinopora taylora</i>        | Yes  | NT       | N/A      | 413                 | 528               | 528                     |                                                                   |                       | <i>Echinopora</i> monophyly shown [81]                                         |
| Faviidae | <i>Echinopora tiranensis</i>     | Yes  | DD       | N/A      | 484                 | 631               | 631                     |                                                                   |                       | <i>Echinopora</i> monophyly shown [81]                                         |
| Faviidae | <i>Erythraea flabellata</i>      | Yes  | NT       | N/A      | 373                 | 432               | 424                     |                                                                   |                       | Closest to <i>Caulastraea</i> [86]                                             |
| Faviidae | <i>Favia albidus</i>             | Yes  | NT       | N/A      | 361                 | 419               | 411                     |                                                                   |                       | Clade VII-B monophyly shown [81]; closest to <i>F. matthaii</i> [93]           |
| Faviidae | <i>Favia danae</i>               | Yes  | LC       | N/A      | 713                 | 594               | 594                     | COI: EU371663                                                     |                       |                                                                                |
| Faviidae | <i>Favia fava</i>                | Yes  | LC       | N/A      | 619                 | 448               | 440                     | 12S: AF177048;<br>COI: AB117267;<br>CYB: AB117346                 |                       |                                                                                |
| Faviidae | <i>Favia fragum</i>              | Yes  | LC       | N/A      | 712                 | 589               | 589                     | 12S: EF597005;<br>16S: U40295;<br>COI: AB117222;<br>CYB: AB117301 | [61]                  |                                                                                |
| Faviidae | <i>Favia gravida</i>             | Yes  | DD       | N/A      | 421                 | 444               | 436                     |                                                                   | [61]                  | Previously excluded [11]                                                       |
| Faviidae | <i>Favia helianthoides</i>       | Yes  | NT       | N/A      | 342                 | 378               | 370                     |                                                                   |                       | Clade VII-B monophyly shown [81]; closest to <i>F. laxa</i> [92]               |
| Faviidae | <i>Favia lacuna</i>              | Yes  | NT       | N/A      | 409                 | 520               | 520                     |                                                                   |                       | Clade VII-B monophyly shown [81]                                               |
| Faviidae | <i>Favia laxa</i>                | Yes  | NT       | N/A      | 341                 | 377               | 369                     | COI: EU371707                                                     |                       | <i>Favia</i> cf. <i>laxa</i> in GenBank                                        |
| Faviidae | <i>Favia leptophylla</i>         | Yes  | DD       | N/A      | 441                 | 484               | 478                     | COI: AB117229;<br>CYB: AB117307                                   | [61,68]               |                                                                                |
| Faviidae | <i>Favia lizardensis</i>         | Yes  | NT       | N/A      | 359                 | 417               | 409                     | COI: HM018633                                                     |                       |                                                                                |
| Faviidae | <i>Favia maritima</i>            | Yes  | NT       | N/A      | 254                 | 140               | 130                     | COI: HQ203258                                                     |                       | <i>Favia</i> cf. <i>maritima</i> in GenBank                                    |
| Faviidae | <i>Favia marshae</i>             | Yes  | NT       | N/A      | 345                 | 384               | 376                     |                                                                   |                       | Clade VII-F monophyly shown [81]; closest to <i>F. rotundata</i> [93]          |
| Faviidae | <i>Favia matthaii</i>            | Yes  | NT       | N/A      | 360                 | 418               | 410                     | COI: HQ203259                                                     |                       |                                                                                |
| Faviidae | <i>Favia maxima</i>              | Yes  | NT       | N/A      | 284                 | 219               | 213                     | COI: HQ203260                                                     |                       |                                                                                |
| Faviidae | <i>Favia pallida</i>             | Yes  | LC       | N/A      | 713                 | 594               | 594                     | COI: AB117266;<br>CYB: AB117345                                   |                       |                                                                                |
| Faviidae | <i>Favia rosaria</i>             | Yes  | VU       | N/A      | 151                 | 289               | 288                     | COI: HQ203262                                                     |                       |                                                                                |
| Faviidae | <i>Favia rotumana</i>            | Yes  | LC       | N/A      | 452                 | 184               | 176                     | COI: FJ345427                                                     |                       |                                                                                |
| Faviidae | <i>Favia rotundata</i>           | Yes  | NT       | N/A      | 302                 | 269               | 267                     | COI: HQ203263                                                     |                       | Clade VII-F monophyly shown [81]                                               |
| Faviidae | <i>Favia speciosa</i>            | Yes  | LC       | N/A      | 683                 | 519               | 519                     | COI: AB441194;<br>CYB: AB441279                                   |                       |                                                                                |
| Faviidae | <i>Favia stelligera</i>          | Yes  | NT       | N/A      | 310                 | 296               | 295                     | COI: AB117264;<br>CYB: AB117343                                   |                       |                                                                                |
| Faviidae | <i>Favia truncatus</i>           | Yes  | LC       | N/A      | 761                 | 655               | 655                     | COI: HQ203266                                                     |                       |                                                                                |
| Faviidae | <i>Favia veroni</i>              | Yes  | NT       | N/A      | 334                 | 362               | 354                     |                                                                   |                       | Clade VII-B monophyly shown [81]; closest to <i>F. maxima</i> [85]             |
| Faviidae | <i>Favia vietnamensis</i>        | Yes  | NT       | N/A      | 409                 | 520               | 520                     |                                                                   |                       | Clade VII-B monophyly shown [81]                                               |
| Faviidae | <i>Favites abdita</i>            | Yes  | NT       | N/A      | 268                 | 160               | 152                     | COI: HQ203267                                                     | [68]                  |                                                                                |
| Faviidae | <i>Favites acuticollis</i>       | Yes  | NT       | N/A      | 390                 | 469               | 462                     |                                                                   |                       | Clade VII-F monophyly shown [81]                                               |
| Faviidae | <i>Favites bestae</i>            | Yes  | NT       | N/A      | 390                 | 469               | 462                     |                                                                   |                       | Clade VII-F monophyly shown [81]                                               |
| Faviidae | <i>Favites chinensis</i>         | Yes  | NT       | N/A      | 347                 | 387               | 379                     | COI: AB117269;<br>CYB: AB117349                                   |                       |                                                                                |
| Faviidae | <i>Favites complanata</i>        | Yes  | NT       | N/A      | 294                 | 245               | 242                     | COI: EU371689                                                     |                       |                                                                                |

| Family   | Species                          | Reef | Red List | EoE rank | EDGE rank (IUCN100) | EDGE rank (Isaac) | EDGE rank (Pessimistic) | Molecular sources                                                                     | Morphological sources | Remarks                                            |
|----------|----------------------------------|------|----------|----------|---------------------|-------------------|-------------------------|---------------------------------------------------------------------------------------|-----------------------|----------------------------------------------------|
| Faviidae | <i>Favites flexuosa</i>          | Yes  | NT       | N/A      | 289                 | 239               | 236                     | COI: HQ203269                                                                         |                       |                                                    |
| Faviidae | <i>Favites halicora</i>          | Yes  | NT       | N/A      | 290                 | 240               | 237                     | COI: AB117268;<br>CYB: AB117348                                                       |                       |                                                    |
| Faviidae | <i>Favites micropentagona</i>    | Yes  | NT       | N/A      | 277                 | 194               | 186                     |                                                                                       |                       | Closest to <i>F. pentagona</i> [93]                |
| Faviidae | <i>Favites paraflexuosa</i>      | Yes  | NT       | N/A      | 226                 | 123               | 113                     | COI: EU371694                                                                         |                       |                                                    |
| Faviidae | <i>Favites pentagona</i>         | Yes  | LC       | N/A      | 574                 | 373               | 365                     | COI: HQ203271                                                                         |                       |                                                    |
| Faviidae | <i>Favites russelli</i>          | Yes  | NT       | N/A      | 223                 | 118               | 109                     | COI: HQ203272                                                                         |                       |                                                    |
| Faviidae | <i>Favites spinosa</i>           | Yes  | VU       | N/A      | 152                 | 291               | 290                     |                                                                                       |                       | Clade VII-F monophyly shown [81]                   |
| Faviidae | <i>Favites stylifera</i>         | Yes  | NT       | N/A      | 235                 | 127               | 117                     | COI: HQ203273                                                                         | [64]                  | Clade VII-G monophyly shown [81]                   |
| Faviidae | <i>Favites vasta</i>             | Yes  | NT       | N/A      | 390                 | 469               | 462                     |                                                                                       |                       | Clade VII-F monophyly shown [81]                   |
| Faviidae | <i>Goniastrea aspera</i>         | Yes  | LC       | N/A      | 709                 | 580               | 580                     | COI: AB117271;<br>CYB: AB117351                                                       |                       |                                                    |
| Faviidae | <i>Goniastrea australensis</i>   | Yes  | LC       | N/A      | 500                 | 261               | 259                     | COI: HQ203274                                                                         |                       |                                                    |
| Faviidae | <i>Goniastrea columella</i>      | Yes  | NT       | N/A      | 349                 | 390               | 382                     |                                                                                       |                       | Closest to <i>G. pectinata</i> [92]                |
| Faviidae | <i>Goniastrea deformis</i>       | Yes  | VU       | N/A      | 11                  | 3                 | 2                       | COI: AB441195;<br>CYB: AB441280                                                       |                       |                                                    |
| Faviidae | <i>Goniastrea edwardsi</i>       | Yes  | LC       | N/A      | 722                 | 605               | 605                     | COI: EU371697                                                                         |                       |                                                    |
| Faviidae | <i>Goniastrea favulus</i>        | Yes  | NT       | N/A      | 348                 | 389               | 381                     | COI: EU371698                                                                         |                       |                                                    |
| Faviidae | <i>Goniastrea minuta</i>         | Yes  | NT       | N/A      | 311                 | 297               | 296                     |                                                                                       |                       | Closest to <i>G. retiformis</i> [93]               |
| Faviidae | <i>Goniastrea palauensis</i>     | Yes  | NT       | N/A      | 240                 | 135               | 124                     | COI: EU371699                                                                         |                       | Clade VII-B monophyly shown [81]                   |
| Faviidae | <i>Goniastrea pectinata</i>      | Yes  | LC       | N/A      | 721                 | 604               | 604                     | COI: AB117270;<br>CYB: AB117350                                                       |                       |                                                    |
| Faviidae | <i>Goniastrea peresi</i>         | Yes  | NT       | N/A      | 371                 | 430               | 422                     |                                                                                       |                       | Closest to <i>G. aspera</i> [92]                   |
| Faviidae | <i>Goniastrea ramosa</i>         | Yes  | VU       | N/A      | 91                  | 146               | 136                     |                                                                                       |                       | Closest to <i>G. retiformis</i> [93]               |
| Faviidae | <i>Goniastrea retiformis</i>     | Yes  | LC       | N/A      | 673                 | 476               | 470                     | 12S: EF597033;<br>COI: HQ203275                                                       |                       |                                                    |
| Faviidae | <i>Goniastrea thecata</i>        | Yes  | NT       | N/A      | 371                 | 430               | 422                     |                                                                                       |                       | Closest to <i>G. aspera</i> [93]                   |
| Faviidae | <i>Leptastrea aequalis</i>       | Yes  | VU       | N/A      | 71                  | 84                | 79                      |                                                                                       |                       | <i>Leptastrea</i> + Fungiidae monophyly shown [82] |
| Faviidae | <i>Leptastrea bewickensis</i>    | Yes  | NT       | N/A      | 281                 | 213               | 207                     |                                                                                       |                       | <i>Leptastrea</i> + Fungiidae monophyly shown [82] |
| Faviidae | <i>Leptastrea bottae</i>         | Yes  | NT       | N/A      | 281                 | 213               | 207                     |                                                                                       |                       | <i>Leptastrea</i> + Fungiidae monophyly shown [82] |
| Faviidae | <i>Leptastrea inaequalis</i>     | Yes  | NT       | N/A      | 281                 | 213               | 207                     |                                                                                       |                       | <i>Leptastrea</i> + Fungiidae monophyly shown [82] |
| Faviidae | <i>Leptastrea pruinosa</i>       | Yes  | LC       | N/A      | 502                 | 263               | 261                     | COI: AB441196;<br>CYB: AB441281                                                       |                       |                                                    |
| Faviidae | <i>Leptastrea purpurea</i>       | Yes  | LC       | N/A      | 532                 | 301               | 300                     | COI: EU371702                                                                         |                       |                                                    |
| Faviidae | <i>Leptastrea transversa</i>     | Yes  | LC       | N/A      | 531                 | 300               | 299                     | COI: HM018655                                                                         |                       |                                                    |
| Faviidae | <i>Leptoria irregularis</i>      | Yes  | VU       | N/A      | 89                  | 144               | 134                     | COI: AB117272;<br>CYB: AB117353                                                       |                       |                                                    |
| Faviidae | <i>Leptoria phrygia</i>          | Yes  | NT       | N/A      | 279                 | 205               | 199                     | 16S: L76011;<br>COI: AB117273;<br>CYB: AB117354                                       |                       |                                                    |
| Faviidae | <i>Manicina areolata</i>         | Yes  | LC       | ED       | 665                 | 456               | 448                     | 12S: EF597012;<br>COI: AB117227;<br>CYB: AB117305                                     | [61]                  |                                                    |
| Faviidae | <i>Montastraea annularis</i>     | Yes  | EN       | N/A      | 2                   | 7                 | 21                      | 12S: AP008973;<br>16S: AP008973;<br>AT6: AP008973;<br>COI: AP008973;<br>CYB: AP008973 |                       |                                                    |
| Faviidae | <i>Montastraea annuligera</i>    | Yes  | NT       | N/A      | 340                 | 376               | 368                     | COI: JN248781                                                                         |                       | Clade VII-B monophyly shown [81]                   |
| Faviidae | <i>Montastraea cavernosa</i>     | Yes  | LC       | ED       | 395                 | 104               | 97                      | 12S: EF597006;<br>COI: AB117288;<br>CYB: AB117373                                     | [68]                  |                                                    |
| Faviidae | <i>Montastraea colemani</i>      | Yes  | NT       | N/A      | 288                 | 238               | 235                     | COI: HQ203284                                                                         |                       | Clade VII-F monophyly shown [81]                   |
| Faviidae | <i>Montastraea curta</i>         | Yes  | LC       | N/A      | 538                 | 312               | 310                     | COI: AB117278;<br>CYB: AB117359                                                       |                       |                                                    |
| Faviidae | <i>Montastraea faveolata</i>     | Yes  | EN       | N/A      | 2                   | 7                 | 21                      | 12S: AP008977;<br>16S: AP008977;<br>AT6: AP008977;<br>COI: AP008977;<br>CYB: AP008977 |                       |                                                    |
| Faviidae | <i>Montastraea franksi</i>       | Yes  | VU       | N/A      | 36                  | 34                | 28                      | 12S: AP008976;<br>16S: AP008976;<br>AT6: AP008976;<br>COI: AP008976;<br>CYB: AP008976 |                       |                                                    |
| Faviidae | <i>Montastraea magnistellata</i> | Yes  | NT       | N/A      | 326                 | 333               | 331                     | COI: AB117279;<br>CYB: AB117360                                                       |                       | Clade VII-F monophyly shown [81]                   |
| Faviidae | <i>Montastraea multipunctata</i> | Yes  | VU       | N/A      | 38                  | 37                | 32                      | COI: HQ203289                                                                         |                       |                                                    |
| Faviidae | <i>Montastraea salebroza</i>     | Yes  | VU       | N/A      | 92                  | 149               | 139                     | COI: HQ203290                                                                         |                       |                                                    |
| Faviidae | <i>Montastraea serageldini</i>   | Yes  | VU       | N/A      | 49                  | 59                | 54                      |                                                                                       |                       | Closest to <i>M. curta</i> [93]                    |
| Faviidae | <i>Montastraea valenciennesi</i> | Yes  | NT       | N/A      | 307                 | 283               | 281                     | 12S: AF333061;<br>COI: AB117280;<br>CYB: AB117361                                     |                       | Clade VII-F monophyly shown [81]                   |
| Faviidae | <i>Moseleya latistellata</i>     | Yes  | VU       | 12       | 30                  | 24                | 17                      | COI: HQ203293                                                                         |                       |                                                    |



| Family      | Species                          | Reef List | Red rank | EoE rank | EDGE rank (IUCN100) | EDGE rank (Isaac) | EDGE rank (Pessimistic) | Molecular sources                                 | Morphological sources | Remarks                                           |
|-------------|----------------------------------|-----------|----------|----------|---------------------|-------------------|-------------------------|---------------------------------------------------|-----------------------|---------------------------------------------------|
| Faviidae    | <i>Oulastrea crispata</i>        | Yes       | LC       | ED       | 224                 | 2                 | 1                       | 12S: AF333062;<br>COI: AB441197;<br>CYB: AB441282 |                       |                                                   |
| Faviidae    | <i>Oulophyllia bennettiae</i>    | Yes       | NT       | N/A      | 350                 | 391               | 383                     | COI: AB117277;<br>CYB: AB117358                   |                       |                                                   |
| Faviidae    | <i>Oulophyllia crispa</i>        | Yes       | NT       | N/A      | 351                 | 392               | 384                     | COI: AB117276;<br>CYB: AB117357                   |                       |                                                   |
| Faviidae    | <i>Oulophyllia levis</i>         | Yes       | LC       | N/A      | 725                 | 609               | 609                     |                                                   |                       | Closest to <i>O. crispa</i> [92]                  |
| Faviidae    | <i>Parasimplastrea sheppardi</i> | Yes       | EN       | 5        | 10                  | 42                | 125                     |                                                   |                       | Closest to <i>Leptastrea</i> [93]                 |
| Faviidae    | <i>Platygyra acuta</i>           | Yes       | NT       | N/A      | 319                 | 316               | 314                     | COI: JN248782                                     | [64]                  |                                                   |
| Faviidae    | <i>Platygyra carnosus</i>        | Yes       | NT       | N/A      | 375                 | 437               | 429                     |                                                   |                       |                                                   |
| Faviidae    | <i>Platygyra contorta</i>        | Yes       | LC       | N/A      | 681                 | 509               | 506                     | COI: JN248783                                     | [64]                  |                                                   |
| Faviidae    | <i>Platygyra crosslandi</i>      | Yes       | NT       | N/A      | 375                 | 437               | 429                     |                                                   |                       |                                                   |
| Faviidae    | <i>Platygyra daedalea</i>        | Yes       | LC       | N/A      | 527                 | 295               | 294                     | COI: AB117281;<br>CYB: AB117362                   | [64,68]               |                                                   |
| Faviidae    | <i>Platygyra lamellina</i>       | Yes       | NT       | N/A      | 317                 | 314               | 312                     | COI: HQ203302;<br>CYB: AB117363                   | [64]                  |                                                   |
| Faviidae    | <i>Platygyra pini</i>            | Yes       | LC       | N/A      | 513                 | 281               | 279                     | COI: HQ203303                                     | [64]                  |                                                   |
| Faviidae    | <i>Platygyra ryukyuensis</i>     | Yes       | NT       | N/A      | 319                 | 316               | 314                     | COI: HQ203304                                     | [64]                  |                                                   |
| Faviidae    | <i>Platygyra sinensis</i>        | Yes       | LC       | N/A      | 755                 | 649               | 649                     | 12S: AF177047;<br>COI: HQ203305                   | [64]                  |                                                   |
| Faviidae    | <i>Platygyra verweyi</i>         | Yes       | NT       | N/A      | 317                 | 314               | 312                     | COI: EU371722                                     | [64]                  | <i>Platygyra</i> cf. <i>verweyi</i> in GenBank    |
| Faviidae    | <i>Platygyra yaeyamaensis</i>    | Yes       | VU       | N/A      | 143                 | 266               | 264                     |                                                   | [64]                  |                                                   |
| Faviidae    | <i>Plesiastrea devantieri</i>    | Yes       | NT       | ED       | 404                 | 512               | 509                     | COI: FR837987                                     |                       |                                                   |
| Faviidae    | <i>Plesiastrea versipora</i>     | Yes       | LC       | ED       | 418                 | 129               | 119                     | COI: AB289561;<br>CYB: AB289566                   |                       |                                                   |
| Faviidae    | <i>Solenastrea bournoni</i>      | Yes       | LC       | N/A      | 487                 | 254               | 252                     | COI: AB117291;<br>CYB: AB117376                   |                       |                                                   |
| Faviidae    | <i>Solenastrea hyades</i>        | Yes       | LC       | N/A      | 429                 | 150               | 140                     | COI: FJ966870                                     |                       |                                                   |
| Flabellidae | <i>Flabellum alabastrum</i>      | No        | N/A      | N/A      | N/A                 | N/A               | N/A                     |                                                   | [64]                  |                                                   |
| Flabellidae | <i>Flabellum angulare</i>        | No        | N/A      | N/A      | N/A                 | N/A               | N/A                     | 16S: AF550363                                     | [64]                  |                                                   |
| Flabellidae | <i>Flabellum angustum</i>        | No        | N/A      | N/A      | N/A                 | N/A               | N/A                     |                                                   | [64]                  |                                                   |
| Flabellidae | <i>Flabellum aotearoa</i>        | No        | N/A      | N/A      | N/A                 | N/A               | N/A                     |                                                   | [64]                  |                                                   |
| Flabellidae | <i>Flabellum apertum</i>         | No        | N/A      | N/A      | N/A                 | N/A               | N/A                     | COI: HM018635                                     | [64]                  |                                                   |
| Flabellidae | <i>Flabellum arcuatile</i>       | No        | N/A      | N/A      | N/A                 | N/A               | N/A                     | COI: HM018636                                     | [64]                  |                                                   |
| Flabellidae | <i>Flabellum areum</i>           | No        | N/A      | N/A      | N/A                 | N/A               | N/A                     |                                                   | [64]                  |                                                   |
| Flabellidae | <i>Flabellum atlanticum</i>      | No        | N/A      | N/A      | N/A                 | N/A               | N/A                     |                                                   | [64]                  |                                                   |
| Flabellidae | <i>Flabellum australe</i>        | No        | N/A      | N/A      | N/A                 | N/A               | N/A                     |                                                   | [64]                  |                                                   |
| Flabellidae | <i>Flabellum campanulatum</i>    | No        | N/A      | N/A      | N/A                 | N/A               | N/A                     |                                                   | [64]                  |                                                   |
| Flabellidae | <i>Flabellum chunii</i>          | No        | N/A      | N/A      | N/A                 | N/A               | N/A                     |                                                   | [64]                  |                                                   |
| Flabellidae | <i>Flabellum conuis</i>          | No        | N/A      | N/A      | N/A                 | N/A               | N/A                     |                                                   | [64]                  |                                                   |
| Flabellidae | <i>Flabellum curvatum</i>        | No        | N/A      | N/A      | N/A                 | N/A               | N/A                     |                                                   | [64]                  |                                                   |
| Flabellidae | <i>Flabellum daphnense</i>       | No        | DD       | N/A      | N/A                 | N/A               | N/A                     |                                                   | [64]                  |                                                   |
| Flabellidae | <i>Flabellum deludens</i>        | No        | N/A      | N/A      | N/A                 | N/A               | N/A                     | 16S: AB510170;<br>COI: HM018638                   | [64]                  |                                                   |
| Flabellidae | <i>Flabellum flexuosum</i>       | No        | N/A      | N/A      | N/A                 | N/A               | N/A                     |                                                   | [64]                  |                                                   |
| Flabellidae | <i>Flabellum floridanum</i>      | No        | N/A      | N/A      | N/A                 | N/A               | N/A                     |                                                   | [64]                  |                                                   |
| Flabellidae | <i>Flabellum folkesoni</i>       | No        | N/A      | N/A      | N/A                 | N/A               | N/A                     | COI: HM018639                                     | [64]                  |                                                   |
| Flabellidae | <i>Flabellum gardineri</i>       | No        | N/A      | N/A      | N/A                 | N/A               | N/A                     |                                                   | [64]                  |                                                   |
| Flabellidae | <i>Flabellum hoffmeisteri</i>    | No        | N/A      | N/A      | N/A                 | N/A               | N/A                     |                                                   | [64]                  |                                                   |
| Flabellidae | <i>Flabellum impensum</i>        | No        | N/A      | N/A      | N/A                 | N/A               | N/A                     | 16S: AF265582                                     | [64]                  |                                                   |
| Flabellidae | <i>Flabellum japonicum</i>       | No        | N/A      | N/A      | N/A                 | N/A               | N/A                     | 16S: AB510178                                     | [64]                  |                                                   |
| Flabellidae | <i>Flabellum knoxi</i>           | No        | N/A      | N/A      | N/A                 | N/A               | N/A                     |                                                   | [64]                  |                                                   |
| Flabellidae | <i>Flabellum lamellulosum</i>    | No        | N/A      | N/A      | N/A                 | N/A               | N/A                     | COI: HM018640                                     | [64]                  |                                                   |
| Flabellidae | <i>Flabellum lowekeyesi</i>      | No        | N/A      | N/A      | N/A                 | N/A               | N/A                     | COI: HM018641                                     | [64]                  |                                                   |
| Flabellidae | <i>Flabellum macandrewi</i>      | No        | N/A      | N/A      | N/A                 | N/A               | N/A                     |                                                   | [64]                  |                                                   |
| Flabellidae | <i>Flabellum magnificum</i>      | No        | N/A      | N/A      | N/A                 | N/A               | N/A                     | 16S: AB510167;<br>COI: HM018637                   | [64]                  | <i>Flabellum</i> cf. <i>magnificum</i> in GenBank |
| Flabellidae | <i>Flabellum marcus</i>          | No        | N/A      | N/A      | N/A                 | N/A               | N/A                     |                                                   | [64]                  |                                                   |
| Flabellidae | <i>Flabellum marenzelleri</i>    | No        | N/A      | N/A      | N/A                 | N/A               | N/A                     |                                                   | [64]                  |                                                   |
| Flabellidae | <i>Flabellum messum</i>          | No        | N/A      | N/A      | N/A                 | N/A               | N/A                     |                                                   | [64]                  |                                                   |
| Flabellidae | <i>Flabellum moseleyi</i>        | No        | N/A      | N/A      | N/A                 | N/A               | N/A                     |                                                   | [64]                  |                                                   |
| Flabellidae | <i>Flabellum ongulense</i>       | No        | N/A      | N/A      | N/A                 | N/A               | N/A                     |                                                   | [64]                  |                                                   |
| Flabellidae | <i>Flabellum patens</i>          | No        | N/A      | N/A      | N/A                 | N/A               | N/A                     |                                                   | [64]                  |                                                   |
| Flabellidae | <i>Flabellum pavoninum</i>       | No        | N/A      | N/A      | N/A                 | N/A               | N/A                     | 16S: AB510168                                     | [64]                  |                                                   |
| Flabellidae | <i>Flabellum politum</i>         | No        | N/A      | N/A      | N/A                 | N/A               | N/A                     |                                                   | [64]                  |                                                   |
| Flabellidae | <i>Flabellum sexcostatum</i>     | No        | N/A      | N/A      | N/A                 | N/A               | N/A                     |                                                   | [64]                  |                                                   |
| Flabellidae | <i>Flabellum sibogae</i>         | No        | N/A      | N/A      | N/A                 | N/A               | N/A                     |                                                   | [64]                  |                                                   |
| Flabellidae | <i>Flabellum thourarsii</i>      | No        | N/A      | N/A      | N/A                 | N/A               | N/A                     |                                                   | [64]                  |                                                   |
| Flabellidae | <i>Flabellum transversale</i>    | No        | N/A      | N/A      | N/A                 | N/A               | N/A                     |                                                   | [64]                  |                                                   |
| Flabellidae | <i>Flabellum tuthilli</i>        | No        | N/A      | N/A      | N/A                 | N/A               | N/A                     | COI: HM018643                                     | [64]                  |                                                   |
| Flabellidae | <i>Flabellum vaughani</i>        | No        | N/A      | N/A      | N/A                 | N/A               | N/A                     | COI: HM018644                                     | [64]                  |                                                   |
| Flabellidae | <i>Javania exserta</i>           | No        | N/A      | N/A      | N/A                 | N/A               | N/A                     | COI: HM018651                                     |                       |                                                   |
| Flabellidae | <i>Javania fusca</i>             | No        | N/A      | N/A      | N/A                 | N/A               | N/A                     | COI: HM018652                                     |                       |                                                   |
| Flabellidae | <i>Javania insignis</i>          | No        | N/A      | N/A      | N/A                 | N/A               | N/A                     | 16S: AB510174                                     |                       |                                                   |
| Flabellidae | <i>Javania lamprotrichum</i>     | No        | N/A      | N/A      | N/A                 | N/A               | N/A                     | COI: HM018653                                     |                       |                                                   |
| Flabellidae | <i>Monomyces pygmaea</i>         | No        | N/A      | N/A      | N/A                 | N/A               | N/A                     | 16S: AF265583                                     | [64]                  |                                                   |
| Flabellidae | <i>Monomyces rubrum</i>          | No        | N/A      | N/A      | N/A                 | N/A               | N/A                     |                                                   | [64]                  |                                                   |
| Flabellidae | <i>Placotrochides scaphula</i>   | No        | N/A      | N/A      | N/A                 | N/A               | N/A                     | COI: HM018661                                     |                       |                                                   |

| Family          | Species                                | Reef | Red List | EoE rank | EDGE rank (IUCN100) | EDGE rank (Isaac) | EDGE rank (Pessimistic) | Molecular sources                                                                                       | Morphological sources | Remarks                                                                |
|-----------------|----------------------------------------|------|----------|----------|---------------------|-------------------|-------------------------|---------------------------------------------------------------------------------------------------------|-----------------------|------------------------------------------------------------------------|
| Flabellidae     | <i>Placotrochus laevis</i>             | No   | N/A      | N/A      | N/A                 | N/A               | N/A                     | 16S: AF265589                                                                                           | [64]                  |                                                                        |
| Flabellidae     | <i>Rhizotrochus typus</i>              | No   | N/A      | N/A      | N/A                 | N/A               | N/A                     | 16S: AB510175                                                                                           |                       |                                                                        |
| Flabellidae     | <i>Truncatoflabellum australiensis</i> | No   | N/A      | N/A      | N/A                 | N/A               | N/A                     | COI: HM018670                                                                                           |                       |                                                                        |
| Flabellidae     | <i>Truncatoflabellum candeanum</i>     | No   | N/A      | N/A      | N/A                 | N/A               | N/A                     | COI: HM018671                                                                                           |                       |                                                                        |
| Flabellidae     | <i>Truncatoflabellum macroeschara</i>  | No   | N/A      | N/A      | N/A                 | N/A               | N/A                     | COI: HM018672                                                                                           |                       |                                                                        |
| Flabellidae     | <i>Truncatoflabellum spheniscus</i>    | No   | N/A      | N/A      | N/A                 | N/A               | N/A                     | 16S: AB510172                                                                                           |                       |                                                                        |
| Fungiacyathidae | <i>Fungiacyathus fragilis</i>          | No   | N/A      | N/A      | N/A                 | N/A               | N/A                     | COI: HM018645                                                                                           |                       |                                                                        |
| Fungiacyathidae | <i>Fungiacyathus marenzelleri</i>      | No   | N/A      | N/A      | N/A                 | N/A               | N/A                     | 12S: EF597074;<br>16S: L76004                                                                           |                       |                                                                        |
| Fungiacyathidae | <i>Fungiacyathus pusillus</i>          | No   | N/A      | N/A      | N/A                 | N/A               | N/A                     | COI: HM018646                                                                                           |                       |                                                                        |
| Fungiacyathidae | <i>Fungiacyathus stephanus</i>         | No   | N/A      | N/A      | N/A                 | N/A               | N/A                     | 12S: JF825138;<br>16S: JF825138;<br>AT6: JF825138;<br>COI: JF825138;<br>CYB: JF825138;<br>ND5: JF825138 |                       |                                                                        |
| Fungiacyathidae | <i>Fungiacyathus turbinolioides</i>    | No   | N/A      | N/A      | N/A                 | N/A               | N/A                     | COI: HM018648                                                                                           |                       |                                                                        |
| Fungiidae       | <i>Cantharellus doederleini</i>        | Yes  | LC       | N/A      | 748                 | 642               | 642                     |                                                                                                         | [65]                  |                                                                        |
| Fungiidae       | <i>Cantharellus jebbi</i>              | Yes  | LC       | N/A      | 748                 | 642               | 642                     |                                                                                                         |                       | <i>Cantharellus</i> monophyly assumed                                  |
| Fungiidae       | <i>Cantharellus noumeae</i>            | Yes  | EN       | N/A      | 22                  | 114               | 218                     |                                                                                                         | [65]                  |                                                                        |
| Fungiidae       | <i>Ctenactis albitentaculata</i>       | Yes  | NT       | N/A      | 269                 | 161               | 153                     | COI: EU149869                                                                                           | [65]                  |                                                                        |
| Fungiidae       | <i>Ctenactis crassa</i>                | Yes  | LC       | N/A      | 548                 | 328               | 326                     | COI: EU149859                                                                                           | [65]                  |                                                                        |
| Fungiidae       | <i>Ctenactis echinata</i>              | Yes  | LC       | N/A      | 546                 | 326               | 324                     | COI: EU149879                                                                                           | [65]                  |                                                                        |
| Fungiidae       | <i>Cycloseris costulata</i>            | Yes  | LC       | N/A      | 510                 | 276               | 274                     | COI: EU149870                                                                                           | [65,68]               | Revised from <i>Fungia costulata</i> [79]                              |
| Fungiidae       | <i>Cycloseris curvata</i>              | Yes  | VU       | N/A      | 141                 | 257               | 255                     |                                                                                                         | [65]                  | Revised from <i>Fungia curvata</i> [79]                                |
| Fungiidae       | <i>Cycloseris cyclolites</i>           | Yes  | LC       | N/A      | 506                 | 271               | 269                     | COI: EU202719                                                                                           | [65]                  | Revised from <i>Fungia cyclolites</i> [79]                             |
| Fungiidae       | <i>Cycloseris distorta</i>             | Yes  | LC       | N/A      | 748                 | 642               | 642                     |                                                                                                         | [65]                  | Revised from <i>Fungia distorta</i> [79]                               |
| Fungiidae       | <i>Cycloseris fragilis</i>             | Yes  | LC       | N/A      | 507                 | 272               | 270                     | 16S: L75998;<br>COI: EU149860                                                                           | [65]                  | Revised from <i>Fungia fragilis</i> [79]                               |
| Fungiidae       | <i>Cycloseris hexagonalis</i>          | Yes  | LC       | N/A      | 748                 | 642               | 642                     |                                                                                                         | [65]                  | Revised from <i>Fungia hexagonalis</i> [79]                            |
| Fungiidae       | <i>Cycloseris mokai</i>                | Yes  | LC       | N/A      | 504                 | 268               | 266                     | COI: EU149877                                                                                           | [65,68]               | Revised from <i>Lithophyllon mokai</i> [79]                            |
| Fungiidae       | <i>Cycloseris sinensis</i>             | Yes  | LC       | N/A      | 505                 | 270               | 268                     | COI: EU149900                                                                                           | [65,68]               | Revised from <i>Fungia sinensis</i> [79]                               |
| Fungiidae       | <i>Cycloseris somervillei</i>          | Yes  | LC       | N/A      | 748                 | 642               | 642                     |                                                                                                         | [65]                  | Revised from <i>Fungia somervillei</i> [79]                            |
| Fungiidae       | <i>Cycloseris tenuis</i>               | Yes  | LC       | N/A      | 511                 | 277               | 275                     | COI: EU149871                                                                                           | [65]                  | Revised from <i>Fungia tenuis</i> [79]                                 |
| Fungiidae       | <i>Cycloseris vaughani</i>             | Yes  | LC       | N/A      | 508                 | 273               | 271                     | 16S: L75999;<br>COI: EU149861                                                                           | [65]                  | Revised from <i>Fungia vaughani</i> [79]                               |
| Fungiidae       | <i>Danafungia horrida</i>              | Yes  | LC       | N/A      | 693                 | 556               | 556                     |                                                                                                         | [65]                  | Revised from <i>Fungia horrida</i> [79]                                |
| Fungiidae       | <i>Danafungia scruposa</i>             | Yes  | LC       | N/A      | 398                 | 111               | 103                     | COI: EU149872                                                                                           | [65]                  | Revised from <i>Fungia scruposa</i> [79]                               |
| Fungiidae       | <i>Fungia fungites</i>                 | Yes  | NT       | N/A      | 140                 | 23                | 16                      | COI: EU149892                                                                                           | [64,65,68]            |                                                                        |
| Fungiidae       | <i>Halomitra clavator</i>              | Yes  | VU       | N/A      | 21                  | 12                | 8                       | COI: EU149904                                                                                           | [65]                  |                                                                        |
| Fungiidae       | <i>Halomitra pileus</i>                | Yes  | LC       | N/A      | 379                 | 82                | 77                      | COI: EU149865                                                                                           | [65,68]               |                                                                        |
| Fungiidae       | <i>Heliofungia actiniformis</i>        | Yes  | VU       | 3        | 16                  | 9                 | 5                       | 12S: EF596995;<br>COI: EU149885                                                                         | [65]                  |                                                                        |
| Fungiidae       | <i>Heliofungia fralinae</i>            | Yes  | LC       | N/A      | 394                 | 103               | 96                      | COI: EU149901                                                                                           | [65]                  | Revised from <i>Fungia fralinae</i> [79]                               |
| Fungiidae       | <i>Herpolitha limax</i>                | Yes  | LC       | N/A      | 460                 | 195               | 187                     | COI: AB441223;<br>CYB: AB441308                                                                         | [65,68]               |                                                                        |
| Fungiidae       | <i>Lithophyllon concinna</i>           | Yes  | LC       | N/A      | 427                 | 147               | 137                     | COI: EU149893                                                                                           | [65,68]               | Revised from <i>Fungia concinna</i> [79]                               |
| Fungiidae       | <i>Lithophyllon puishani</i>           | Yes  | DD       | N/A      | 301                 | 190               | 182                     |                                                                                                         |                       | Revised from <i>Fungia puishani</i> ; closest to <i>L. scabra</i> [93] |
| Fungiidae       | <i>Lithophyllon ranjithi</i>           | Yes  | EN       | N/A      | 7                   | 17                | 41                      |                                                                                                         |                       | <i>Lithophyllon</i> monophyly shown [79]                               |
| Fungiidae       | <i>Lithophyllon repanda</i>            | Yes  | LC       | N/A      | 428                 | 148               | 138                     | COI: EU149883                                                                                           | [65,68]               | Revised from <i>Fungia repanda</i> [79]                                |
| Fungiidae       | <i>Lithophyllon scabra</i>             | Yes  | LC       | N/A      | 455                 | 187               | 179                     | COI: EU149874                                                                                           | [65]                  | Revised from <i>Fungia scabra</i> [79]                                 |
| Fungiidae       | <i>Lithophyllon spinifer</i>           | Yes  | LC       | N/A      | 419                 | 130               | 120                     | COI: EU149864                                                                                           | [65]                  | Revised from <i>Fungia spinifer</i> [79]                               |
| Fungiidae       | <i>Lithophyllon undulatum</i>          | Yes  | NT       | N/A      | 172                 | 48                | 44                      | COI: EU149867                                                                                           | [65]                  |                                                                        |
| Fungiidae       | <i>Lobactis scutaria</i>               | Yes  | LC       | N/A      | 298                 | 22                | 15                      | 12S: DQ320497;<br>16S: L76005;<br>COI: AB441224;<br>CYB: AB441309                                       | [65]                  | Revised from <i>Fungia scutaria</i> [79]                               |
| Fungiidae       | <i>Pleuraetis granulosa</i>            | Yes  | LC       | N/A      | 472                 | 212               | 206                     | COI: EU149884                                                                                           | [65,66]               | Revised from <i>Fungia granulosa</i> [79]                              |
| Fungiidae       | <i>Pleuraetis gravis</i>               | Yes  | DD       | N/A      | 305                 | 199               | 192                     | COI: EU149910                                                                                           | [65,66]               | Previously excluded [11]; revised from <i>Fungia gravis</i> [79]       |

| Family        | Species                           | Reef List | Red List | EoE rank | EDGE rank (IUCN100) | EDGE rank (Isaac) | EDGE rank (Pessimistic) | Molecular sources                                                   | Morphological sources | Remarks                                                                                                     |
|---------------|-----------------------------------|-----------|----------|----------|---------------------|-------------------|-------------------------|---------------------------------------------------------------------|-----------------------|-------------------------------------------------------------------------------------------------------------|
| Fungiidae     | <i>PleuRACTIS moluccensis</i>     | Yes       | LC       | N/A      | 501                 | 262               | 260                     | COI: EU149909                                                       | [65,66]               | Revised from <i>Fungia moluccensis</i> [79]                                                                 |
| Fungiidae     | <i>PleuRACTIS paumotensis</i>     | Yes       | LC       | N/A      | 620                 | 450               | 442                     | COI: EU149911                                                       | [65,66]               | Revised from <i>Fungia paumotensis</i> [79]                                                                 |
| Fungiidae     | <i>PleuRACTIS seychellensis</i>   | Yes       | VU       | N/A      | 84                  | 126               | 116                     |                                                                     | [66]                  | Revised from <i>Fungia seychellensis</i> [79]                                                               |
| Fungiidae     | <i>PleuRACTIS taiwanensis</i>     | Yes       | VU       | N/A      | 56                  | 68                | 63                      |                                                                     | [66]                  | Revised from <i>Fungia taiwanensis</i> [79]                                                                 |
| Fungiidae     | <i>Podabacia crustacea</i>        | Yes       | LC       | N/A      | 583                 | 396               | 388                     | COI: EU149878                                                       | [65]                  |                                                                                                             |
| Fungiidae     | <i>Podabacia kunzmanni</i>        | Yes       | DD       | N/A      | 366                 | 346               | 344                     | COI: EU149908                                                       |                       | New species [46]                                                                                            |
| Fungiidae     | <i>Podabacia motuporensis</i>     | Yes       | NT       | N/A      | 238                 | 132               | 121                     | COI: EU149868                                                       |                       |                                                                                                             |
| Fungiidae     | <i>Podabacia sinai</i>            | Yes       | DD       | N/A      | 366                 | 346               | 344                     | COI: EU149888                                                       |                       |                                                                                                             |
| Fungiidae     | <i>Polyphyllia novaehiberniae</i> | Yes       | NT       | N/A      | 312                 | 303               | 302                     |                                                                     | [65]                  |                                                                                                             |
| Fungiidae     | <i>Polyphyllia talpina</i>        | Yes       | LC       | N/A      | 675                 | 478               | 472                     | COI: EU149915                                                       | [65,68]               |                                                                                                             |
| Fungiidae     | <i>Sandalolitha dentata</i>       | Yes       | LC       | N/A      | 581                 | 394               | 386                     | COI: EU149914                                                       | [65]                  |                                                                                                             |
| Fungiidae     | <i>Sandalolitha robusta</i>       | Yes       | LC       | N/A      | 582                 | 395               | 387                     | COI: EU149917                                                       | [65]                  |                                                                                                             |
| Fungiidae     | <i>Zoopilus echinatus</i>         | Yes       | LC       | N/A      | 621                 | 451               | 443                     | 12S: EF596990;<br>16S: L76024;<br>COI: EU149916                     | [64,65,68]            |                                                                                                             |
| Gardineriidae | <i>Gardineria hawaiiensis</i>     | No        | N/A      | N/A      | N/A                 | N/A               | N/A                     | 12S: GQ868660;<br>16S: GQ868701;<br>COI: GQ868678                   |                       |                                                                                                             |
| Gardineriidae | <i>Gardineria paradoxa</i>        | No        | N/A      | N/A      | N/A                 | N/A               | N/A                     | 12S: GQ868656;<br>16S: GQ868700;<br>COI: GQ868681                   |                       |                                                                                                             |
| Guyniidae     | <i>Guynia annulata</i>            | No        | N/A      | N/A      | N/A                 | N/A               | N/A                     | 16S: AF265580                                                       |                       |                                                                                                             |
| Meandrinidae  | <i>Ctenella chagius</i>           | Yes       | EN       | 9        | 1                   | 1                 | 10                      | COI: AB441208;<br>CYB: AB441293                                     |                       |                                                                                                             |
| Meandrinidae  | <i>Dendrogyra cylindrus</i>       | Yes       | VU       | 2        | 50                  | 60                | 55                      | 12S: EF597024;<br>COI: AB117299;<br>CYB: AB117384                   |                       |                                                                                                             |
| Meandrinidae  | <i>Dichocoenia stellaris</i>      | Yes       | DD       | N/A      | 346                 | 304               | 303                     |                                                                     | [64]                  |                                                                                                             |
| Meandrinidae  | <i>Dichocoenia stokesi</i>        | Yes       | VU       | 7        | 60                  | 73                | 68                      | 12S: EF597020;<br>16S: AF265607;<br>COI: AB117298;<br>CYB: AB117383 | [64]                  |                                                                                                             |
| Meandrinidae  | <i>Eusmilium fastigiata</i>       | Yes       | LC       | N/A      | 550                 | 331               | 329                     | COI: AB117294;<br>CYB: AB117380                                     |                       |                                                                                                             |
| Meandrinidae  | <i>Gyrosmilium interrupta</i>     | Yes       | LC       | N/A      | 571                 | 370               | 362                     |                                                                     |                       | Closest to <i>Ctenella chagius</i> [92]                                                                     |
| Meandrinidae  | <i>Meandrina braziliensis</i>     | Yes       | DD       | N/A      | 296                 | 173               | 165                     | COI: AB117297;<br>CYB: AB117382                                     | [68]                  |                                                                                                             |
| Meandrinidae  | <i>Meandrina danae</i>            | Yes       | LC       | N/A      | 576                 | 380               | 372                     |                                                                     |                       | Closest to <i>M. braziliensis</i> [87]                                                                      |
| Meandrinidae  | <i>Meandrina meandrites</i>       | Yes       | LC       | N/A      | 499                 | 260               | 258                     | 12S: EF597032;<br>COI: AB117296;<br>CYB: AB117381                   |                       |                                                                                                             |
| Meandrinidae  | <i>Montigyra kenti</i>            | Yes       | DD       | N/A      | 329                 | 258               | 256                     |                                                                     |                       | Closest to <i>Gyrosmilium</i> [90]                                                                          |
| Merulinidae   | <i>Boninastrea boninensis</i>     | Yes       | DD       | N/A      | 426                 | 453               | 445                     |                                                                     |                       | Closest to <i>Merulina</i> [90]                                                                             |
| Merulinidae   | <i>Hydnophora bonsai</i>          | Yes       | EN       | N/A      | 23                  | 121               | 232                     |                                                                     | [64]                  |                                                                                                             |
| Merulinidae   | <i>Hydnophora exesa</i>           | Yes       | NT       | N/A      | 303                 | 275               | 273                     | 12S: AF333059;<br>COI: AB117285;<br>CYB: AB117370                   | [64]                  |                                                                                                             |
| Merulinidae   | <i>Hydnophora grandis</i>         | Yes       | LC       | N/A      | 480                 | 248               | 245                     | COI: AB117286;<br>CYB: AB117371                                     | [64]                  |                                                                                                             |
| Merulinidae   | <i>Hydnophora microconos</i>      | Yes       | NT       | N/A      | 199                 | 100               | 93                      | COI: HQ203277                                                       | [64]                  |                                                                                                             |
| Merulinidae   | <i>Hydnophora pilosa</i>          | Yes       | LC       | N/A      | 481                 | 249               | 246                     | COI: HQ203278                                                       | [64]                  |                                                                                                             |
| Merulinidae   | <i>Hydnophora rigida</i>          | Yes       | LC       | N/A      | 729                 | 615               | 615                     | 12S: EF597000;<br>16S: L76009                                       | [64]                  |                                                                                                             |
| Merulinidae   | <i>Merulina ampliata</i>          | Yes       | LC       | N/A      | 680                 | 490               | 484                     | 12S: AF333058;<br>COI: AB117283;<br>CYB: AB117368                   |                       |                                                                                                             |
| Merulinidae   | <i>Merulina scabricula</i>        | Yes       | LC       | N/A      | 710                 | 581               | 581                     | 16S: L76014;<br>COI: AB117284;<br>CYB: AB117369                     |                       |                                                                                                             |
| Merulinidae   | <i>Merulina scheeri</i>           | Yes       | LC       | N/A      | 690                 | 540               | 540                     |                                                                     |                       | <i>Merulina</i> monophyly shown [81]; closest to <i>M. ampliata</i> [80]<br>Closest to <i>Merulina</i> [89] |
| Merulinidae   | <i>Paraclavaria triangularis</i>  | Yes       | NT       | N/A      | 339                 | 375               | 367                     |                                                                     |                       |                                                                                                             |
| Merulinidae   | <i>Scapophyllia cylindrica</i>    | Yes       | LC       | N/A      | 694                 | 557               | 557                     | COI: AB441198;<br>CYB: AB441283                                     |                       |                                                                                                             |
| Micrabaciidae | <i>Leptopenus antarcticus</i>     | No        | N/A      | N/A      | N/A                 | N/A               | N/A                     |                                                                     | [68]                  |                                                                                                             |
| Micrabaciidae | <i>Letepsammia formosissima</i>   | No        | N/A      | N/A      | N/A                 | N/A               | N/A                     | 12S: GQ868663;<br>16S: GQ868697;<br>COI: GQ868685                   |                       |                                                                                                             |
| Micrabaciidae | <i>Rhombosammia niphada</i>       | No        | N/A      | N/A      | N/A                 | N/A               | N/A                     | 12S: GQ868661;<br>16S: GQ868693;<br>COI: GQ868683                   |                       |                                                                                                             |
| Micrabaciidae | <i>Stephanophyllia complicata</i> | No        | N/A      | N/A      | N/A                 | N/A               | N/A                     | 16S: GQ868689                                                       |                       |                                                                                                             |
| Mussidae      | <i>Acanthastrea bowerbanki</i>    | Yes       | VU       | N/A      | 130                 | 230               | 226                     |                                                                     | [67]                  |                                                                                                             |
| Mussidae      | <i>Acanthastrea brevis</i>        | Yes       | VU       | N/A      | 130                 | 230               | 226                     |                                                                     | [67]                  |                                                                                                             |
| Mussidae      | <i>Acanthastrea echinata</i>      | Yes       | LC       | N/A      | 691                 | 554               | 554                     | COI: AB117249;<br>CYB: AB117327                                     | [61,67]               |                                                                                                             |
| Mussidae      | <i>Acanthastrea javiaformis</i>   | Yes       | VU       | N/A      | 130                 | 230               | 226                     |                                                                     | [67]                  |                                                                                                             |

| Family     | Species                           | Reef | Red List | EoE rank  | EDGE rank (IUCN100) | EDGE rank (Isaac) | EDGE rank (Pessimistic) | Molecular sources                                                                     | Morphological sources | Remarks                                                               |
|------------|-----------------------------------|------|----------|-----------|---------------------|-------------------|-------------------------|---------------------------------------------------------------------------------------|-----------------------|-----------------------------------------------------------------------|
| Mussidae   | <i>Acanthastrea hemprichii</i>    | Yes  | VU       | N/A       | 130                 | 230               | 226                     |                                                                                       | [67]                  |                                                                       |
| Mussidae   | <i>Acanthastrea hillae</i>        | Yes  | NT       | ED        | 171                 | 47                | 43                      | COI: AB441199;<br>CYB: AB441284                                                       |                       |                                                                       |
| Mussidae   | <i>Acanthastrea ishigakiensis</i> | Yes  | VU       | N/A       | 130                 | 230               | 226                     |                                                                                       | [67]                  |                                                                       |
| Mussidae   | <i>Acanthastrea lordhowensis</i>  | Yes  | NT       | N/A       | 355                 | 405               | 397                     |                                                                                       | [67]                  |                                                                       |
| Mussidae   | <i>Acanthastrea maxima</i>        | Yes  | NT       | N/A       | 355                 | 405               | 397                     |                                                                                       | [67]                  |                                                                       |
| Mussidae   | <i>Acanthastrea regularis</i>     | Yes  | VU       | N/A       | 130                 | 230               | 226                     |                                                                                       | [67]                  |                                                                       |
| Mussidae   | <i>Acanthastrea rotundiflora</i>  | Yes  | NT       | N/A       | 327                 | 336               | 334                     | COI: AB117251;<br>CYB: AB117328                                                       | [61,67]               |                                                                       |
| Mussidae   | <i>Acanthastrea subechinata</i>   | Yes  | NT       | N/A       | 355                 | 405               | 397                     |                                                                                       | [67]                  |                                                                       |
| Mussidae   | <i>Australomussa rowleyensis</i>  | Yes  | NT       | N/A       | 365                 | 421               | 413                     |                                                                                       | [67]                  |                                                                       |
| Mussidae   | <i>Blastomussa merleti</i>        | Yes  | LC       | ED        | 412                 | 128               | 118                     |                                                                                       | [67]                  |                                                                       |
| Mussidae   | <i>Blastomussa wellsii</i>        | Yes  | NT       | ED        | 86                  | 5                 | 3                       | COI: AB289563;<br>CYB: AB289565                                                       | [67]                  |                                                                       |
| Mussidae   | <i>Cynarina lacrymalis</i>        | Yes  | NT       | N/A       | 168                 | 41                | 36                      | 12S: EF597034;<br>COI: AB117246;<br>CYB: AB117323                                     | [67]                  |                                                                       |
| Mussidae   | <i>Indophyllia macassarensis</i>  | Yes  | DD       | N/A       | 314                 | 241               | 238                     |                                                                                       |                       | Closest to <i>Cynarina lacrymalis</i> [73]                            |
| Mussidae   | <i>Isophyllastrea rigida</i>      | Yes  | LC       | N/A       | 698                 | 561               | 561                     |                                                                                       | [61,67]               |                                                                       |
| Mussidae   | <i>Isophyllia sinuosa</i>         | Yes  | LC       | N/A       | 672                 | 475               | 469                     | COI: AB117238;<br>CYB: AB117315                                                       | [61,67]               |                                                                       |
| Mussidae   | <i>Lobophyllia corymbosa</i>      | Yes  | LC       | N/A       | 600                 | 426               | 418                     | COI: AB117241;<br>CYB: AB117318                                                       | [64,67]               |                                                                       |
| Mussidae   | <i>Lobophyllia dentatus</i>       | Yes  | VU       | N/A       | 120                 | 216               | 210                     |                                                                                       | [64,67]               |                                                                       |
| Mussidae   | <i>Lobophyllia diminuta</i>       | Yes  | VU       | N/A       | 120                 | 216               | 210                     |                                                                                       | [64,67]               |                                                                       |
| Mussidae   | <i>Lobophyllia flabelliformis</i> | Yes  | VU       | N/A       | 120                 | 216               | 210                     |                                                                                       | [64,67]               |                                                                       |
| Mussidae   | <i>Lobophyllia hataii</i>         | Yes  | LC       | N/A       | 723                 | 607               | 607                     |                                                                                       | [64,67]               |                                                                       |
| Mussidae   | <i>Lobophyllia hemprichii</i>     | Yes  | LC       | N/A       | 577                 | 385               | 377                     | 12S: EF597013;<br>16S: L76013;<br>COI: AB117240;<br>CYB: AB117317                     | [64,67,68]            |                                                                       |
| Mussidae   | <i>Lobophyllia pachysepta</i>     | Yes  | NT       | N/A       | 280                 | 206               | 200                     | COI: AB117242;<br>CYB: AB117319                                                       | [64,67]               |                                                                       |
| Mussidae   | <i>Lobophyllia robusta</i>        | Yes  | LC       | N/A       | 723                 | 607               | 607                     |                                                                                       | [64,67]               |                                                                       |
| Mussidae   | <i>Lobophyllia serratus</i>       | Yes  | EN       | N/A       | 15                  | 86                | 189                     |                                                                                       | [64,67]               |                                                                       |
| Mussidae   | <i>Micromussa amakusensis</i>     | Yes  | NT       | ED        | 198                 | 95                | 89                      | COI: AB441200;<br>CYB: AB441285                                                       |                       |                                                                       |
| Mussidae   | <i>Micromussa diminuta</i>        | Yes  | DD       | N/A       | 295                 | 170               | 162                     |                                                                                       |                       | <i>Micromussa</i> monophyly assumed; closest to <i>M. minuta</i> [93] |
| Mussidae   | <i>Micromussa minuta</i>          | Yes  | NT       | N/A       | 227                 | 124               | 114                     |                                                                                       |                       | <i>Micromussa</i> monophyly assumed                                   |
| Mussidae   | <i>Mussa angulosa</i>             | Yes  | LC       | N/A       | 664                 | 455               | 447                     | 12S: DQ643834;<br>16S: DQ643834;<br>AT6: DQ643834;<br>COI: DQ643834;<br>CYB: DQ643834 | [61,67]               |                                                                       |
| Mussidae   | <i>Mussismilia braziliensis</i>   | Yes  | DD       | Potential | 443                 | 486               | 480                     | COI: AB117231;<br>CYB: AB117309                                                       | [61,67,68]            |                                                                       |
| Mussidae   | <i>Mussismilia hartii</i>         | Yes  | DD       | N/A       | 444                 | 487               | 481                     | COI: AB117232;<br>CYB: AB117308                                                       | [61,67,68]            |                                                                       |
| Mussidae   | <i>Mussismilia hispida</i>        | Yes  | DD       | N/A       | 442                 | 485               | 479                     | COI: AB117233;<br>CYB: AB117310                                                       | [61,67,68]            |                                                                       |
| Mussidae   | <i>Mycetophyllia aliciae</i>      | Yes  | LC       | N/A       | 537                 | 309               | 308                     | 12S: EF597039;<br>COI: AB117235;<br>CYB: AB117312                                     | [61,67]               |                                                                       |
| Mussidae   | <i>Mycetophyllia danaana</i>      | Yes  | LC       | N/A       | 695                 | 558               | 558                     | COI: AB117234;<br>CYB: AB117311                                                       | [61,67]               |                                                                       |
| Mussidae   | <i>Mycetophyllia ferox</i>        | Yes  | VU       | N/A       | 94                  | 154               | 144                     |                                                                                       | [61,67]               |                                                                       |
| Mussidae   | <i>Mycetophyllia lamarckiana</i>  | Yes  | LC       | N/A       | 458                 | 193               | 185                     | 12S: EF597040                                                                         | [61,67]               |                                                                       |
| Mussidae   | <i>Mycetophyllia reesi</i>        | Yes  | DD       | N/A       | 358                 | 335               | 333                     |                                                                                       | [61,67]               |                                                                       |
| Mussidae   | <i>Scolymia australis</i>         | Yes  | LC       | N/A       | 671                 | 474               | 468                     |                                                                                       | [67]                  |                                                                       |
| Mussidae   | <i>Scolymia cubensis</i>          | Yes  | LC       | N/A       | 696                 | 559               | 559                     | COI: AB117236;<br>CYB: AB117314                                                       | [61]                  | Atlantic <i>Scolymia</i>                                              |
| Mussidae   | <i>Scolymia lacera</i>            | Yes  | LC       | N/A       | 697                 | 560               | 560                     |                                                                                       | [61]                  | Junior synonym of <i>S. cubensis</i> [92]; Atlantic <i>Scolymia</i>   |
| Mussidae   | <i>Scolymia vitiensis</i>         | Yes  | NT       | N/A       | 265                 | 157               | 146                     | COI: AB117247;<br>CYB: AB117324                                                       | [67]                  |                                                                       |
| Mussidae   | <i>Scolymia wellsii</i>           | Yes  | DD       | N/A       | 411                 | 425               | 417                     |                                                                                       | [61,68]               | Junior synonym of <i>S. cubensis</i> [78]; Atlantic <i>Scolymia</i>   |
| Mussidae   | <i>Symphyllia agaricia</i>        | Yes  | LC       | N/A       | 702                 | 564               | 564                     | COI: AB117243;<br>CYB: AB117320                                                       | [67]                  |                                                                       |
| Mussidae   | <i>Symphyllia erythraea</i>       | Yes  | LC       | N/A       | 703                 | 565               | 565                     |                                                                                       | [67]                  |                                                                       |
| Mussidae   | <i>Symphyllia hassi</i>           | Yes  | VU       | N/A       | 110                 | 186               | 178                     |                                                                                       | [67]                  |                                                                       |
| Mussidae   | <i>Symphyllia radians</i>         | Yes  | LC       | N/A       | 700                 | 562               | 562                     | COI: AB117245;<br>CYB: AB117322                                                       | [67]                  |                                                                       |
| Mussidae   | <i>Symphyllia recta</i>           | Yes  | LC       | N/A       | 701                 | 563               | 563                     | COI: AB117244;<br>CYB: AB117321                                                       | [67]                  |                                                                       |
| Mussidae   | <i>Symphyllia valenciennesii</i>  | Yes  | LC       | N/A       | 578                 | 386               | 378                     | COI: HM018666                                                                         | [67]                  |                                                                       |
| Mussidae   | <i>Symphyllia wilsoni</i>         | Yes  | LC       | N/A       | 703                 | 565               | 565                     |                                                                                       | [67]                  |                                                                       |
| Oculinidae | <i>Cyathelia axillararis</i>      | No   | N/A      | N/A       | N/A                 | N/A               | N/A                     | COI: HM018622                                                                         |                       |                                                                       |

| Family      | Species                             | Reef | Red List | EoE       | EDGE rank (IUCN100) | EDGE rank (Isaac) | EDGE rank (Pessimistic) | Molecular sources                                                 | Morphological sources | Remarks                                                                                                      |
|-------------|-------------------------------------|------|----------|-----------|---------------------|-------------------|-------------------------|-------------------------------------------------------------------|-----------------------|--------------------------------------------------------------------------------------------------------------|
| Oculinidae  | <i>Galaxea acrhelia</i>             | Yes  | VU       | N/A       | 78                  | 97                | 91                      |                                                                   |                       | Closest to <i>G. horrescens</i> [93]                                                                         |
| Oculinidae  | <i>Galaxea astreata</i>             | Yes  | VU       | N/A       | 55                  | 67                | 62                      | 12S: AF333056                                                     |                       |                                                                                                              |
| Oculinidae  | <i>Galaxea cryptoramosa</i>         | Yes  | VU       | N/A       | 73                  | 88                | 82                      |                                                                   |                       | Closest to <i>G. astreata</i> [93]                                                                           |
| Oculinidae  | <i>Galaxea fascicularis</i>         | Yes  | NT       | N/A       | 304                 | 278               | 276                     | 16S: L76006;<br>COI: AB441201;<br>CYB: AB441286;<br>ND5: AB109376 |                       |                                                                                                              |
| Oculinidae  | <i>Galaxea horrescens</i>           | Yes  | LC       | N/A       | 594                 | 416               | 408                     | 12S: EF597096;<br>16S: L75994                                     |                       |                                                                                                              |
| Oculinidae  | <i>Galaxea longisepta</i>           | Yes  | NT       | N/A       | 293                 | 242               | 239                     |                                                                   |                       | Closest to <i>G. horrescens</i> [93]                                                                         |
| Oculinidae  | <i>Galaxea paucisepta</i>           | Yes  | NT       | N/A       | 285                 | 220               | 215                     |                                                                   |                       | Closest to <i>G. astreata</i> [75]                                                                           |
| Oculinidae  | <i>Madrepora oculata</i>            | No   | N/A      | N/A       | N/A                 | N/A               | N/A                     | 16S: AF550369;<br>COI: HM018659                                   |                       |                                                                                                              |
| Oculinidae  | <i>Oculina diffusa</i>              | Yes  | LC       | N/A       | 585                 | 408               | 400                     | COI: AB117293;<br>CYB: AB117379                                   | [64]                  |                                                                                                              |
| Oculinidae  | <i>Oculina patagonica</i>           | Yes  | LC       | N/A       | 764                 | 661               | 661                     | 12S: EF597025;<br>16S: AF265601                                   | [64,68]               |                                                                                                              |
| Oculinidae  | <i>Oculina profunda</i>             | No   | N/A      | N/A       | N/A                 | N/A               | N/A                     |                                                                   | [64]                  |                                                                                                              |
| Oculinidae  | <i>Oculina robusta</i>              | Yes  | DD       | N/A       | 325                 | 253               | 250                     | COI: FJ966869                                                     | [64]                  |                                                                                                              |
| Oculinidae  | <i>Oculina tenella</i>              | Yes  | DD       | N/A       | 473                 | 590               | 590                     |                                                                   | [64]                  |                                                                                                              |
| Oculinidae  | <i>Oculina valenciennesi</i>        | Yes  | DD       | N/A       | 473                 | 590               | 590                     |                                                                   | [64]                  |                                                                                                              |
| Oculinidae  | <i>Oculina varicosa</i>             | Yes  | VU       | 11        | 88                  | 139               | 129                     | COI: FJ966875                                                     | [64]                  |                                                                                                              |
| Oculinidae  | <i>Oculina virgosa</i>              | No   | N/A      | N/A       | N/A                 | N/A               | N/A                     |                                                                   | [64]                  |                                                                                                              |
| Oculinidae  | <i>Schizoculina africana</i>        | Yes  | DD       | Potential | 475                 | 592               | 592                     |                                                                   |                       | <i>Schizoculina</i> monophyly assumed; closest to <i>Oculina</i> [95]                                        |
| Oculinidae  | <i>Schizoculina fissipara</i>       | Yes  | DD       | Potential | 475                 | 592               | 592                     |                                                                   |                       | <i>Schizoculina</i> monophyly assumed; closest to <i>Oculina</i> [95]                                        |
| Oculinidae  | <i>Simplastrea vesicularis</i>      | Yes  | DD       | Potential | 381                 | 374               | 366                     |                                                                   |                       | Closest to <i>Galaxea</i> [92]                                                                               |
| Pectiniidae | <i>Echinomorpha nishihirai</i>      | Yes  | NT       | N/A       | 337                 | 366               | 358                     |                                                                   |                       | Closest to <i>Echinophyllia</i> [91]                                                                         |
| Pectiniidae | <i>Echinophyllia aspera</i>         | Yes  | LC       | N/A       | 568                 | 364               | 356                     | COI: AB117252;<br>CYB: AB117329                                   |                       |                                                                                                              |
| Pectiniidae | <i>Echinophyllia costata</i>        | Yes  | VU       | N/A       | 95                  | 155               | 145                     |                                                                   |                       | <i>Echinophyllia</i> monophyly shown [42]; closest to <i>E. pectinata</i> [93]                               |
| Pectiniidae | <i>Echinophyllia echinata</i>       | Yes  | LC       | N/A       | 679                 | 483               | 477                     |                                                                   |                       | <i>Echinophyllia</i> monophyly shown [42]                                                                    |
| Pectiniidae | <i>Echinophyllia echinoporoides</i> | Yes  | LC       | N/A       | 586                 | 409               | 401                     | COI: AB117254;<br>CYB: AB117331                                   |                       |                                                                                                              |
| Pectiniidae | <i>Echinophyllia orpheensis</i>     | Yes  | LC       | N/A       | 549                 | 329               | 327                     | 12S: AF333065;<br>COI: AB117253;<br>CYB: AB117330                 |                       |                                                                                                              |
| Pectiniidae | <i>Echinophyllia patula</i>         | Yes  | LC       | N/A       | 608                 | 434               | 426                     |                                                                   |                       | <i>Echinophyllia</i> monophyly shown [42]; closest to <i>E. aspera</i> [92]                                  |
| Pectiniidae | <i>Echinophyllia pectinata</i>      | Yes  | DD       | N/A       | 388                 | 381               | 373                     |                                                                   |                       | <i>Echinophyllia</i> monophyly shown [42]                                                                    |
| Pectiniidae | <i>Mycedium elephantotus</i>        | Yes  | LC       | N/A       | 728                 | 612               | 612                     | 12S: AF333057;<br>COI: AB117387;<br>CYB: AB117366                 |                       |                                                                                                              |
| Pectiniidae | <i>Mycedium mancaoi</i>             | Yes  | LC       | N/A       | 753                 | 647               | 647                     |                                                                   |                       | <i>Mycedium</i> monophyly shown [81]; closest to <i>M. elephantotus</i> [92]                                 |
| Pectiniidae | <i>Mycedium robokaki</i>            | Yes  | LC       | N/A       | 758                 | 652               | 652                     | COI: HQ203295                                                     |                       |                                                                                                              |
| Pectiniidae | <i>Mycedium spina</i>               | Yes  | DD       | N/A       | 457                 | 552               | 552                     |                                                                   |                       | <i>Mycedium</i> monophyly shown [81]                                                                         |
| Pectiniidae | <i>Mycedium steeni</i>              | Yes  | VU       | N/A       | 146                 | 279               | 277                     |                                                                   |                       | <i>Mycedium</i> monophyly shown [81]; closest to <i>M. robokaki</i> [93]                                     |
| Pectiniidae | <i>Mycedium umbra</i>               | Yes  | LC       | N/A       | 753                 | 647               | 647                     |                                                                   |                       | <i>Mycedium</i> monophyly shown [81]; closest to <i>M. elephantotus</i> [93]                                 |
| Pectiniidae | <i>Oxypora convoluta</i>            | Yes  | DD       | N/A       | 386                 | 379               | 371                     |                                                                   |                       | <i>Oxypora</i> monophyly assumed; closest to <i>O. lacera</i> [93]                                           |
| Pectiniidae | <i>Oxypora crassispinosa</i>        | Yes  | LC       | N/A       | 715                 | 596               | 596                     |                                                                   |                       | <i>Oxypora</i> monophyly assumed; closest to <i>O. glabra</i> [92]                                           |
| Pectiniidae | <i>Oxypora egyptensis</i>           | Yes  | DD       | N/A       | 425                 | 452               | 444                     |                                                                   |                       | <i>Oxypora</i> monophyly assumed; closest to <i>O. glabra</i> [92]                                           |
| Pectiniidae | <i>Oxypora glabra</i>               | Yes  | LC       | N/A       | 715                 | 596               | 596                     |                                                                   |                       | <i>Oxypora</i> monophyly assumed                                                                             |
| Pectiniidae | <i>Oxypora lacera</i>               | Yes  | LC       | N/A       | 539                 | 313               | 311                     | COI: AB117255;<br>CYB: AB117332                                   |                       |                                                                                                              |
| Pectiniidae | <i>Pectinia africanus</i>           | Yes  | VU       | N/A       | 150                 | 288               | 287                     |                                                                   |                       | <i>Pectinia</i> + <i>Mycedium</i> monophyly shown [81]; closest to <i>P. lactuca</i> [93]                    |
| Pectiniidae | <i>Pectinia alcornis</i>            | Yes  | VU       | N/A       | 148                 | 286               | 285                     | 12S: EF597037;<br>16S: L76017;<br>COI: AB117385;<br>CYB: AB117364 |                       |                                                                                                              |
| Pectiniidae | <i>Pectinia ayleni</i>              | Yes  | NT       | N/A       | 382                 | 465               | 457                     | COI: HQ203299                                                     |                       |                                                                                                              |
| Pectiniidae | <i>Pectinia crassa</i>              | Yes  | DD       | N/A       | 465                 | 575               | 575                     |                                                                   |                       | <i>Pectinia</i> + <i>Mycedium</i> monophyly shown [81]                                                       |
| Pectiniidae | <i>Pectinia elongata</i>            | Yes  | NT       | N/A       | 383                 | 466               | 458                     |                                                                   |                       | <i>Pectinia</i> + <i>Mycedium</i> monophyly shown [81]                                                       |
| Pectiniidae | <i>Pectinia lactuca</i>             | Yes  | VU       | N/A       | 149                 | 287               | 286                     | COI: HQ203300                                                     |                       |                                                                                                              |
| Pectiniidae | <i>Pectinia maxima</i>              | Yes  | EN       | N/A       | 24                  | 131               | 251                     |                                                                   |                       | <i>Pectinia</i> + <i>Mycedium</i> monophyly shown [81]; closest to <i>P. lactuca</i> & <i>P. ayleni</i> [92] |
| Pectiniidae | <i>Pectinia paeonia</i>             | Yes  | NT       | N/A       | 308                 | 285               | 284                     | COI: AB117386;<br>CYB: AB117365                                   | [68]                  |                                                                                                              |

| Family         | Species                           | Reef | Red List | EoE rank | EDGE rank (IUCN100) | EDGE rank (Isaac) | EDGE rank (Pessimistic) | Molecular sources                                                                     | Morphological sources | Remarks                                                                                                                                                                                                    |
|----------------|-----------------------------------|------|----------|----------|---------------------|-------------------|-------------------------|---------------------------------------------------------------------------------------|-----------------------|------------------------------------------------------------------------------------------------------------------------------------------------------------------------------------------------------------|
| Pectiniidae    | <i>Pectinia pygmaeus</i>          | Yes  | NT       | N/A      | 383                 | 466               | 458                     |                                                                                       |                       | <i>Pectinia</i> + <i>Mycedium</i> monophyly shown [81]; closest to <i>P. elongata</i> & <i>P. teres</i> [93]<br><i>Pectinia</i> + <i>Mycedium</i> monophyly shown [81]; closest to <i>P. elongata</i> [92] |
| Pectiniidae    | <i>Pectinia teres</i>             | Yes  | NT       | N/A      | 383                 | 466               | 458                     |                                                                                       |                       |                                                                                                                                                                                                            |
| Pocilloporidae | <i>Pocillopora ankei</i>          | Yes  | VU       | N/A      | 44                  | 50                | 47                      |                                                                                       | [69]                  |                                                                                                                                                                                                            |
| Pocilloporidae | <i>Pocillopora capitata</i>       | Yes  | LC       | N/A      | 558                 | 340               | 338                     |                                                                                       | [69]                  |                                                                                                                                                                                                            |
| Pocilloporidae | <i>Pocillopora damicornis</i>     | Yes  | LC       | N/A      | 518                 | 290               | 289                     | 12S: EF526302;<br>16S: EF526302;<br>AT6: EF526302;<br>COI: EF526302;<br>CYB: EF526302 | [69]                  |                                                                                                                                                                                                            |
| Pocilloporidae | <i>Pocillopora danae</i>          | Yes  | VU       | N/A      | 44                  | 50                | 47                      |                                                                                       | [69]                  |                                                                                                                                                                                                            |
| Pocilloporidae | <i>Pocillopora effusus</i>        | Yes  | DD       | N/A      | 315                 | 246               | 243                     |                                                                                       | [69]                  |                                                                                                                                                                                                            |
| Pocilloporidae | <i>Pocillopora elegans</i>        | Yes  | VU       | N/A      | 44                  | 50                | 47                      |                                                                                       | [69]                  |                                                                                                                                                                                                            |
| Pocilloporidae | <i>Pocillopora eydouxi</i>        | Yes  | NT       | N/A      | 200                 | 102               | 95                      | 12S: EF526303;<br>16S: EF526303;<br>AT6: EF526303;<br>COI: EF526303;<br>CYB: EF526303 | [69]                  |                                                                                                                                                                                                            |
| Pocilloporidae | <i>Pocillopora fungiformis</i>    | Yes  | EN       | N/A      | 6                   | 15                | 37                      |                                                                                       | [69]                  |                                                                                                                                                                                                            |
| Pocilloporidae | <i>Pocillopora indiaia</i>        | Yes  | VU       | N/A      | 44                  | 50                | 47                      |                                                                                       | [69]                  |                                                                                                                                                                                                            |
| Pocilloporidae | <i>Pocillopora inflata</i>        | Yes  | VU       | N/A      | 44                  | 50                | 47                      |                                                                                       | [69]                  |                                                                                                                                                                                                            |
| Pocilloporidae | <i>Pocillopora kelleheri</i>      | Yes  | LC       | N/A      | 558                 | 340               | 338                     |                                                                                       | [69]                  |                                                                                                                                                                                                            |
| Pocilloporidae | <i>Pocillopora ligulata</i>       | Yes  | LC       | N/A      | 558                 | 340               | 338                     |                                                                                       | [69]                  |                                                                                                                                                                                                            |
| Pocilloporidae | <i>Pocillopora meandrina</i>      | Yes  | LC       | N/A      | 557                 | 339               | 337                     | 12S: EF596976;<br>16S: L76018                                                         | [69]                  |                                                                                                                                                                                                            |
| Pocilloporidae | <i>Pocillopora molokenis</i>      | Yes  | DD       | N/A      | 315                 | 246               | 243                     |                                                                                       | [69]                  |                                                                                                                                                                                                            |
| Pocilloporidae | <i>Pocillopora setichelli</i>     | Yes  | LC       | N/A      | 558                 | 340               | 338                     |                                                                                       | [69]                  |                                                                                                                                                                                                            |
| Pocilloporidae | <i>Pocillopora verrucosa</i>      | Yes  | LC       | N/A      | 424                 | 143               | 133                     | COI: AB441230;<br>CYB: AB441315                                                       | [69]                  |                                                                                                                                                                                                            |
| Pocilloporidae | <i>Pocillopora woodjonesi</i>     | Yes  | LC       | N/A      | 558                 | 340               | 338                     |                                                                                       | [69]                  |                                                                                                                                                                                                            |
| Pocilloporidae | <i>Pocillopora zelli</i>          | Yes  | LC       | N/A      | 558                 | 340               | 338                     |                                                                                       | [69]                  |                                                                                                                                                                                                            |
| Pocilloporidae | <i>Seriatopora aculeata</i>       | Yes  | VU       | N/A      | 33                  | 29                | 23                      |                                                                                       |                       | <i>Seriatopora</i> monophyly shown [42]; closest to <i>S. stellata</i> [92]                                                                                                                                |
| Pocilloporidae | <i>Seriatopora caliendrum</i>     | Yes  | NT       | N/A      | 173                 | 49                | 45                      | 12S: EF633601;<br>16S: EF633601;<br>AT6: EF633601;<br>COI: EF633601;<br>CYB: EF633601 |                       |                                                                                                                                                                                                            |
| Pocilloporidae | <i>Seriatopora dendritica</i>     | Yes  | VU       | N/A      | 31                  | 26                | 19                      |                                                                                       |                       | <i>Seriatopora</i> monophyly shown [42]; closest to <i>S. hystrix</i> [93]                                                                                                                                 |
| Pocilloporidae | <i>Seriatopora guttatus</i>       | Yes  | LC       | N/A      | 470                 | 211               | 205                     |                                                                                       |                       | <i>Seriatopora</i> monophyly shown [42]; closest to <i>S. hystrix</i> [93]                                                                                                                                 |
| Pocilloporidae | <i>Seriatopora hystrix</i>        | Yes  | LC       | N/A      | 453                 | 185               | 177                     | 12S: EF633600;<br>16S: EF633600;<br>AT6: EF633600;<br>COI: EF633600;<br>CYB: EF633600 |                       |                                                                                                                                                                                                            |
| Pocilloporidae | <i>Seriatopora stellata</i>       | Yes  | NT       | N/A      | 197                 | 93                | 87                      |                                                                                       |                       | <i>Seriatopora</i> monophyly shown [42]                                                                                                                                                                    |
| Pocilloporidae | <i>Stylophora danae</i>           | Yes  | LC       | N/A      | 509                 | 274               | 272                     |                                                                                       |                       | <i>Stylophora</i> monophyly assumed; closest to <i>S. pistillata</i> [92]                                                                                                                                  |
| Pocilloporidae | <i>Stylophora kuehlmanni</i>      | Yes  | LC       | N/A      | 534                 | 305               | 304                     |                                                                                       |                       | <i>Stylophora</i> monophyly assumed; closest to <i>S. subseriata</i> [92]                                                                                                                                  |
| Pocilloporidae | <i>Stylophora madagascarensis</i> | Yes  | EN       | N/A      | 5                   | 14                | 31                      |                                                                                       |                       | <i>Stylophora</i> monophyly assumed; closest to <i>S. kuehlmanni</i> & <i>S. subseriata</i> [93]                                                                                                           |
| Pocilloporidae | <i>Stylophora mamillata</i>       | Yes  | LC       | N/A      | 534                 | 305               | 304                     |                                                                                       |                       | <i>Stylophora</i> monophyly assumed; not close to other <i>Stylophora</i> [92]                                                                                                                             |
| Pocilloporidae | <i>Stylophora pistillata</i>      | Yes  | NT       | N/A      | 170                 | 46                | 42                      | 12S: EU400214;<br>16S: EU400214;<br>AT6: EU400214;<br>COI: EU400214;<br>CYB: EU400214 |                       |                                                                                                                                                                                                            |
| Pocilloporidae | <i>Stylophora subseriata</i>      | Yes  | LC       | N/A      | 534                 | 305               | 304                     |                                                                                       |                       | <i>Stylophora</i> monophyly assumed                                                                                                                                                                        |
| Pocilloporidae | <i>Stylophora wellsii</i>         | Yes  | NT       | N/A      | 264                 | 153               | 143                     |                                                                                       |                       | <i>Stylophora</i> monophyly assumed                                                                                                                                                                        |
| Poritidae      | <i>Alveopora allingi</i>          | Yes  | VU       | N/A      | 102                 | 176               | 167                     |                                                                                       |                       | <i>Alveopora</i> monophyly assumed                                                                                                                                                                         |
| Poritidae      | <i>Alveopora catalai</i>          | Yes  | NT       | N/A      | 330                 | 351               | 346                     |                                                                                       |                       | <i>Alveopora</i> monophyly assumed; closest to <i>A. allingi</i> & <i>A. gigas</i> [92]                                                                                                                    |
| Poritidae      | <i>Alveopora daedalea</i>         | Yes  | VU       | N/A      | 102                 | 176               | 167                     | 12S: EF597088;<br>16S: AF265592;<br>COI: AB441245;<br>CYB: AB441330                   |                       | <i>Alveopora</i> sp. in GenBank; ancestral branch shared with conspecifics                                                                                                                                 |
| Poritidae      | <i>Alveopora excelsa</i>          | Yes  | EN       | N/A      | 12                  | 56                | 148                     |                                                                                       |                       | <i>Alveopora</i> monophyly assumed                                                                                                                                                                         |
| Poritidae      | <i>Alveopora fenestrata</i>       | Yes  | VU       | N/A      | 102                 | 176               | 167                     |                                                                                       |                       | <i>Alveopora</i> monophyly assumed; closest to <i>A. marionensis</i> & <i>A. verrilliana</i> [92]                                                                                                          |
| Poritidae      | <i>Alveopora gigas</i>            | Yes  | VU       | N/A      | 102                 | 176               | 167                     |                                                                                       |                       | <i>Alveopora</i> monophyly assumed; closest to <i>A. allingi</i> & <i>A. catalai</i> [92]                                                                                                                  |
| Poritidae      | <i>Alveopora japonica</i>         | Yes  | VU       | N/A      | 102                 | 176               | 167                     |                                                                                       |                       | <i>Alveopora</i> monophyly assumed; closest to <i>A. tizardi</i> [92]                                                                                                                                      |

| Family    | Species                         | Reef | Red List | EoE rank | EDGE rank (IUCN100) | EDGE rank (Isaac) | EDGE rank (Pessimistic) | Molecular sources                                                                                       | Morphological sources | Remarks                                                                                          |
|-----------|---------------------------------|------|----------|----------|---------------------|-------------------|-------------------------|---------------------------------------------------------------------------------------------------------|-----------------------|--------------------------------------------------------------------------------------------------|
| Poritidae | <i>Alveopora marionensis</i>    | Yes  | VU       | N/A      | 102                 | 176               | 167                     |                                                                                                         |                       | <i>Alveopora</i> monophyly assumed; closest to <i>A. fenestrata</i> & <i>A. verrilliana</i> [92] |
| Poritidae | <i>Alveopora minuta</i>         | Yes  | EN       | N/A      | 12                  | 56                | 148                     |                                                                                                         |                       | <i>Alveopora</i> monophyly assumed; closest to <i>A. viridis</i> [93]                            |
| Poritidae | <i>Alveopora ocellata</i>       | Yes  | DD       | N/A      | 403                 | 422               | 414                     |                                                                                                         |                       | <i>Alveopora</i> monophyly assumed                                                               |
| Poritidae | <i>Alveopora spongiosa</i>      | Yes  | NT       | N/A      | 330                 | 351               | 346                     |                                                                                                         |                       | <i>Alveopora</i> monophyly assumed; closest to <i>A. daedalea</i> [92]                           |
| Poritidae | <i>Alveopora tizardi</i>        | Yes  | LC       | N/A      | 692                 | 555               | 555                     |                                                                                                         |                       | <i>Alveopora</i> monophyly assumed                                                               |
| Poritidae | <i>Alveopora verrilliana</i>    | Yes  | VU       | N/A      | 102                 | 176               | 167                     |                                                                                                         |                       | <i>Alveopora</i> monophyly assumed                                                               |
| Poritidae | <i>Alveopora viridis</i>        | Yes  | NT       | N/A      | 330                 | 351               | 346                     |                                                                                                         |                       | <i>Alveopora</i> monophyly assumed                                                               |
| Poritidae | <i>Goniopora albiconus</i>      | Yes  | VU       | N/A      | 159                 | 319               | 317                     |                                                                                                         | [64]                  |                                                                                                  |
| Poritidae | <i>Goniopora burgosi</i>        | Yes  | VU       | N/A      | 159                 | 319               | 317                     |                                                                                                         | [64]                  |                                                                                                  |
| Poritidae | <i>Goniopora cellulosa</i>      | Yes  | VU       | N/A      | 159                 | 319               | 317                     |                                                                                                         | [64]                  |                                                                                                  |
| Poritidae | <i>Goniopora ciliatus</i>       | Yes  | LC       | N/A      | 771                 | 690               | 690                     |                                                                                                         | [64]                  |                                                                                                  |
| Poritidae | <i>Goniopora columna</i>        | Yes  | NT       | N/A      | 333                 | 354               | 349                     | 12S: JF825141;<br>16S: JF825141;<br>AT6: JF825141;<br>COI: JF825141;<br>CYB: JF825141;<br>ND5: JF825141 | [64]                  |                                                                                                  |
| Poritidae | <i>Goniopora djiboutiensis</i>  | Yes  | LC       | N/A      | 771                 | 690               | 690                     |                                                                                                         | [64]                  |                                                                                                  |
| Poritidae | <i>Goniopora eclipsensis</i>    | Yes  | LC       | N/A      | 771                 | 690               | 690                     |                                                                                                         | [64]                  |                                                                                                  |
| Poritidae | <i>Goniopora fruticosa</i>      | Yes  | LC       | N/A      | 771                 | 690               | 690                     |                                                                                                         | [64]                  |                                                                                                  |
| Poritidae | <i>Goniopora lobata</i>         | Yes  | NT       | N/A      | 406                 | 515               | 515                     |                                                                                                         | [64]                  |                                                                                                  |
| Poritidae | <i>Goniopora minor</i>          | Yes  | NT       | N/A      | 406                 | 515               | 515                     |                                                                                                         | [64]                  |                                                                                                  |
| Poritidae | <i>Goniopora norfolkensis</i>   | Yes  | LC       | N/A      | 771                 | 690               | 690                     |                                                                                                         | [64]                  |                                                                                                  |
| Poritidae | <i>Goniopora palmensis</i>      | Yes  | LC       | N/A      | 771                 | 690               | 690                     |                                                                                                         | [64]                  |                                                                                                  |
| Poritidae | <i>Goniopora pandoraensis</i>   | Yes  | LC       | N/A      | 771                 | 690               | 690                     |                                                                                                         | [64]                  |                                                                                                  |
| Poritidae | <i>Goniopora pearsoni</i>       | Yes  | LC       | N/A      | 771                 | 690               | 690                     |                                                                                                         | [64]                  |                                                                                                  |
| Poritidae | <i>Goniopora pendulus</i>       | Yes  | LC       | N/A      | 771                 | 690               | 690                     |                                                                                                         | [64]                  |                                                                                                  |
| Poritidae | <i>Goniopora planulata</i>      | Yes  | VU       | N/A      | 159                 | 319               | 317                     |                                                                                                         | [64]                  |                                                                                                  |
| Poritidae | <i>Goniopora polyformis</i>     | Yes  | VU       | N/A      | 159                 | 319               | 317                     |                                                                                                         | [64]                  |                                                                                                  |
| Poritidae | <i>Goniopora savignyi</i>       | Yes  | LC       | N/A      | 771                 | 690               | 690                     |                                                                                                         | [64]                  |                                                                                                  |
| Poritidae | <i>Goniopora somaliensis</i>    | Yes  | LC       | N/A      | 771                 | 690               | 690                     |                                                                                                         | [64]                  |                                                                                                  |
| Poritidae | <i>Goniopora stokesi</i>        | Yes  | NT       | N/A      | 405                 | 513               | 513                     | 12S: EF597060;<br>16S: L76008                                                                           | [64]                  |                                                                                                  |
| Poritidae | <i>Goniopora stutchburyi</i>    | Yes  | LC       | N/A      | 771                 | 690               | 690                     |                                                                                                         | [64]                  |                                                                                                  |
| Poritidae | <i>Goniopora sultani</i>        | Yes  | LC       | N/A      | 771                 | 690               | 690                     |                                                                                                         | [64]                  |                                                                                                  |
| Poritidae | <i>Goniopora tenella</i>        | Yes  | NT       | N/A      | 406                 | 515               | 515                     |                                                                                                         | [64]                  |                                                                                                  |
| Poritidae | <i>Goniopora tenuidens</i>      | Yes  | LC       | N/A      | 771                 | 690               | 690                     |                                                                                                         | [64,68]               |                                                                                                  |
| Poritidae | <i>Machadoporites tantillus</i> | Yes  | DD       | N/A      | 699                 | 817               | 817                     |                                                                                                         |                       | Closest to <i>Goniopora</i> & <i>Porites</i> [76]                                                |
| Poritidae | <i>Porites amae</i>             | Yes  | NT       | N/A      | 222                 | 115               | 106                     | COI: FJ423965                                                                                           | [64]                  |                                                                                                  |
| Poritidae | <i>Porites arantae</i>          | Yes  | VU       | N/A      | 241                 | 541               | 541                     |                                                                                                         | [64]                  |                                                                                                  |
| Poritidae | <i>Porites araudi</i>           | Yes  | LC       | N/A      | 820                 | 818               | 818                     |                                                                                                         | [64]                  |                                                                                                  |
| Poritidae | <i>Porites astreoides</i>       | Yes  | LC       | N/A      | 573                 | 372               | 364                     | 12S: EF597055;<br>COI: AB441242;<br>CYB: AB441327                                                       | [64,68]               |                                                                                                  |
| Poritidae | <i>Porites attenuata</i>        | Yes  | VU       | N/A      | 241                 | 541               | 541                     |                                                                                                         | [64]                  |                                                                                                  |
| Poritidae | <i>Porites australiensis</i>    | Yes  | LC       | N/A      | 820                 | 818               | 818                     |                                                                                                         | [64]                  |                                                                                                  |
| Poritidae | <i>Porites baueri</i>           | Yes  | DD       | N/A      | 611                 | 757               | 757                     |                                                                                                         | [64]                  |                                                                                                  |
| Poritidae | <i>Porites bernardi</i>         | Yes  | LC       | N/A      | 820                 | 818               | 818                     |                                                                                                         | [64]                  |                                                                                                  |
| Poritidae | <i>Porites branneri</i>         | Yes  | NT       | N/A      | 267                 | 159               | 151                     | 12S: EF597059;<br>COI: AY451380                                                                         | [64]                  |                                                                                                  |
| Poritidae | <i>Porites brighami</i>         | Yes  | LC       | N/A      | 820                 | 818               | 818                     |                                                                                                         | [64]                  |                                                                                                  |
| Poritidae | <i>Porites cocosensis</i>       | Yes  | VU       | N/A      | 241                 | 541               | 541                     |                                                                                                         | [64]                  |                                                                                                  |
| Poritidae | <i>Porites colonensis</i>       | Yes  | DD       | N/A      | 201                 | 58                | 53                      | COI: FJ423972                                                                                           | [64]                  |                                                                                                  |
| Poritidae | <i>Porites columnaris</i>       | Yes  | LC       | N/A      | 820                 | 818               | 818                     |                                                                                                         | [64]                  |                                                                                                  |
| Poritidae | <i>Porites compressa</i>        | Yes  | LC       | N/A      | 677                 | 481               | 475                     | 12S: EF597053;<br>16S: L76020;<br>COI: FJ423970                                                         | [64]                  |                                                                                                  |
| Poritidae | <i>Porites cumulatus</i>        | Yes  | VU       | N/A      | 241                 | 541               | 541                     |                                                                                                         | [64]                  |                                                                                                  |
| Poritidae | <i>Porites cylindrica</i>       | Yes  | NT       | N/A      | 435                 | 585               | 585                     | COI: FJ423968                                                                                           | [64]                  |                                                                                                  |
| Poritidae | <i>Porites decasepta</i>        | Yes  | DD       | N/A      | 611                 | 757               | 757                     |                                                                                                         | [64]                  |                                                                                                  |
| Poritidae | <i>Porites deformis</i>         | Yes  | NT       | N/A      | 519                 | 710               | 710                     |                                                                                                         | [64]                  |                                                                                                  |
| Poritidae | <i>Porites densa</i>            | Yes  | NT       | N/A      | 519                 | 710               | 710                     |                                                                                                         | [64]                  |                                                                                                  |
| Poritidae | <i>Porites desilveri</i>        | Yes  | EN       | N/A      | 65                  | 348               | 485                     |                                                                                                         | [64]                  |                                                                                                  |
| Poritidae | <i>Porites divaricata</i>       | Yes  | LC       | N/A      | 607                 | 433               | 425                     | 12S: EF597058;<br>COI: FJ423969                                                                         | [64]                  |                                                                                                  |
| Poritidae | <i>Porites duerdeni</i>         | Yes  | LC       | N/A      | 677                 | 481               | 475                     | COI: FJ423976                                                                                           | [64]                  |                                                                                                  |
| Poritidae | <i>Porites echinulata</i>       | Yes  | NT       | N/A      | 519                 | 710               | 710                     |                                                                                                         | [64]                  |                                                                                                  |
| Poritidae | <i>Porites ericacea</i>         | Yes  | DD       | N/A      | 611                 | 757               | 757                     |                                                                                                         | [64]                  |                                                                                                  |
| Poritidae | <i>Porites eridani</i>          | Yes  | EN       | N/A      | 65                  | 348               | 485                     |                                                                                                         | [64]                  |                                                                                                  |
| Poritidae | <i>Porites evermanni</i>        | Yes  | DD       | N/A      | 291                 | 165               | 157                     | COI: FJ423984                                                                                           | [64]                  |                                                                                                  |
| Poritidae | <i>Porites excavata</i>         | Yes  | DD       | N/A      | 611                 | 757               | 757                     |                                                                                                         | [64]                  |                                                                                                  |
| Poritidae | <i>Porites flavus</i>           | Yes  | DD       | N/A      | 611                 | 757               | 757                     |                                                                                                         | [64]                  |                                                                                                  |
| Poritidae | <i>Porites furcata</i>          | Yes  | LC       | N/A      | 618                 | 445               | 437                     | COI: FJ423988                                                                                           | [64]                  |                                                                                                  |
| Poritidae | <i>Porites harrisoni</i>        | Yes  | NT       | N/A      | 519                 | 710               | 710                     |                                                                                                         | [64]                  |                                                                                                  |
| Poritidae | <i>Porites heronensis</i>       | Yes  | LC       | N/A      | 820                 | 818               | 818                     |                                                                                                         | [64]                  |                                                                                                  |
| Poritidae | <i>Porites horizontalata</i>    | Yes  | VU       | N/A      | 241                 | 541               | 541                     |                                                                                                         | [64]                  |                                                                                                  |
| Poritidae | <i>Porites latistella</i>       | Yes  | LC       | N/A      | 820                 | 818               | 818                     |                                                                                                         | [64]                  |                                                                                                  |
| Poritidae | <i>Porites lichen</i>           | Yes  | LC       | N/A      | 757                 | 651               | 651                     | COI: FJ423963                                                                                           | [64]                  |                                                                                                  |

| Family         | Species                           | Reef | Red List | EoE rank  | EDGE rank (IUCN100) | EDGE rank (Isaac) | EDGE rank (Pessimistic) | Molecular sources                                                                                       | Morphological sources | Remarks                                                                   |
|----------------|-----------------------------------|------|----------|-----------|---------------------|-------------------|-------------------------|---------------------------------------------------------------------------------------------------------|-----------------------|---------------------------------------------------------------------------|
| Poritidae      | <i>Porites lobata</i>             | Yes  | NT       | N/A       | 158                 | 32                | 26                      | 16S: AF550372;<br>COI: FJ423973                                                                         | [64]                  |                                                                           |
| Poritidae      | <i>Porites lutea</i>              | Yes  | LC       | N/A       | 794                 | 727               | 727                     | COI: AB441243;<br>CYB: AB441328                                                                         | [64]                  |                                                                           |
| Poritidae      | <i>Porites mayeri</i>             | Yes  | LC       | N/A       | 820                 | 818               | 818                     |                                                                                                         | [64]                  |                                                                           |
| Poritidae      | <i>Porites monticulosa</i>        | Yes  | LC       | N/A       | 820                 | 818               | 818                     |                                                                                                         | [64]                  |                                                                           |
| Poritidae      | <i>Porites murrayensis</i>        | Yes  | NT       | N/A       | 519                 | 710               | 710                     |                                                                                                         | [64]                  |                                                                           |
| Poritidae      | <i>Porites myrmdonensis</i>       | Yes  | LC       | N/A       | 820                 | 818               | 818                     |                                                                                                         | [64]                  |                                                                           |
| Poritidae      | <i>Porites napopora</i>           | Yes  | VU       | N/A       | 241                 | 541               | 541                     |                                                                                                         | [64]                  |                                                                           |
| Poritidae      | <i>Porites negrosensis</i>        | Yes  | NT       | N/A       | 519                 | 710               | 710                     |                                                                                                         | [64]                  |                                                                           |
| Poritidae      | <i>Porites nigrescens</i>         | Yes  | VU       | N/A       | 241                 | 541               | 541                     |                                                                                                         | [64]                  |                                                                           |
| Poritidae      | <i>Porites nodifera</i>           | Yes  | LC       | N/A       | 820                 | 818               | 818                     |                                                                                                         | [64]                  |                                                                           |
| Poritidae      | <i>Porites okinawensis</i>        | Yes  | VU       | N/A       | 142                 | 259               | 257                     | 12S: JF825142;<br>16S: JF825142;<br>AT6: JF825142;<br>COI: JF825142;<br>CYB: JF825142;<br>ND5: JF825142 | [64]                  |                                                                           |
| Poritidae      | <i>Porites ornata</i>             | Yes  | EN       | N/A       | 65                  | 348               | 485                     |                                                                                                         | [64]                  |                                                                           |
| Poritidae      | <i>Porites panamensis</i>         | Yes  | LC       | N/A       | 572                 | 371               | 363                     | COI: FJ423990                                                                                           | [64]                  |                                                                           |
| Poritidae      | <i>Porites porites</i>            | Yes  | LC       | N/A       | 533                 | 302               | 301                     | 12S: DQ643837;<br>16S: DQ643837;<br>AT6: DQ643837;<br>COI: DQ643837;<br>CYB: DQ643837;<br>ND5: DQ643837 | [64]                  |                                                                           |
| Poritidae      | <i>Porites profundus</i>          | Yes  | LC       | N/A       | 820                 | 818               | 818                     |                                                                                                         | [64]                  |                                                                           |
| Poritidae      | <i>Porites pukoensis</i>          | Yes  | CR       | N/A       | 40                  | 174               | 466                     |                                                                                                         | [64]                  |                                                                           |
| Poritidae      | <i>Porites randalli</i>           | Yes  | DD       | N/A       | 364                 | 337               | 335                     | COI: FJ423966                                                                                           | [64]                  | New species [45]                                                          |
| Poritidae      | <i>Porites rugosa</i>             | Yes  | VU       | N/A       | 241                 | 541               | 541                     |                                                                                                         | [64]                  |                                                                           |
| Poritidae      | <i>Porites rus</i>                | Yes  | LC       | N/A       | 616                 | 441               | 433                     | COI: FJ423979                                                                                           | [64]                  |                                                                           |
| Poritidae      | <i>Porites sillimaniana</i>       | Yes  | VU       | N/A       | 241                 | 541               | 541                     |                                                                                                         | [64]                  |                                                                           |
| Poritidae      | <i>Porites solida</i>             | Yes  | LC       | N/A       | 795                 | 728               | 728                     | COI: FJ423962                                                                                           | [64]                  |                                                                           |
| Poritidae      | <i>Porites somaliensis</i>        | Yes  | NT       | N/A       | 519                 | 710               | 710                     |                                                                                                         | [64]                  |                                                                           |
| Poritidae      | <i>Porites stephensoni</i>        | Yes  | NT       | N/A       | 519                 | 710               | 710                     |                                                                                                         | [64]                  |                                                                           |
| Poritidae      | <i>Porites studeri</i>            | Yes  | LC       | N/A       | 820                 | 818               | 818                     |                                                                                                         | [64]                  |                                                                           |
| Poritidae      | <i>Porites sverdrupi</i>          | Yes  | VU       | N/A       | 241                 | 541               | 541                     |                                                                                                         | [64]                  |                                                                           |
| Poritidae      | <i>Porites tuberculosa</i>        | Yes  | VU       | N/A       | 241                 | 541               | 541                     |                                                                                                         | [64]                  |                                                                           |
| Poritidae      | <i>Porites vaughani</i>           | Yes  | LC       | N/A       | 820                 | 818               | 818                     |                                                                                                         | [64]                  |                                                                           |
| Poritidae      | <i>Poritipora paliformis</i>      | Yes  | VU       | N/A       | 299                 | 681               | 681                     |                                                                                                         | [64]                  | Poritidae monophyly assumed (excluding <i>Alveopora</i> )                 |
| Poritidae      | <i>Stylaraea punctata</i>         | Yes  | DD       | Potential | 676                 | 805               | 805                     |                                                                                                         | [68]                  | Closest to <i>Porites</i> [90]                                            |
| Rhizangiidae   | <i>Astrangia poculata</i>         | Yes  | LC       | N/A       | 720                 | 602               | 602                     | 12S: DQ643832;<br>AT6: DQ643832;<br>COI: DQ643832;<br>CYB: DQ643832                                     | [67]                  | <i>Astrangia</i> sp. in GenBank; terminal branch shared with conspecifics |
| Rhizangiidae   | <i>Astrangia rathbuni</i>         | No   | N/A      | N/A       | N/A                 | N/A               | N/A                     |                                                                                                         | [68]                  |                                                                           |
| Siderastreidae | <i>Anomastreaa irregularis</i>    | Yes  | VU       | 1         | 19                  | 11                | 7                       | COI: AM494870                                                                                           | [67]                  |                                                                           |
| Siderastreidae | <i>Coscinaeraea columna</i>       | Yes  | LC       | N/A       | 530                 | 298               | 297                     | COI: AB441210;<br>CYB: AB441295                                                                         | [67]                  |                                                                           |
| Siderastreidae | <i>Coscinaeraea crassa</i>        | Yes  | NT       | N/A       | 336                 | 365               | 357                     |                                                                                                         | [67]                  |                                                                           |
| Siderastreidae | <i>Coscinaeraea exesa</i>         | Yes  | LC       | N/A       | 705                 | 576               | 576                     |                                                                                                         | [67]                  |                                                                           |
| Siderastreidae | <i>Coscinaeraea hahazimaensis</i> | Yes  | VU       | N/A       | 112                 | 189               | 181                     |                                                                                                         | [67]                  |                                                                           |
| Siderastreidae | <i>Coscinaeraea marshae</i>       | Yes  | LC       | N/A       | 705                 | 576               | 576                     |                                                                                                         | [67]                  |                                                                           |
| Siderastreidae | <i>Coscinaeraea mcneilli</i>      | Yes  | LC       | N/A       | 705                 | 576               | 576                     |                                                                                                         | [67]                  |                                                                           |
| Siderastreidae | <i>Coscinaeraea monile</i>        | Yes  | LC       | N/A       | 705                 | 576               | 576                     |                                                                                                         | [67]                  |                                                                           |
| Siderastreidae | <i>Coscinaeraea wellsii</i>       | Yes  | LC       | N/A       | 565                 | 355               | 350                     | COI: AM494861                                                                                           | [67]                  | Fungiidae clade [71]                                                      |
| Siderastreidae | <i>Craterestrea levis</i>         | Yes  | LC       | N/A       | 718                 | 600               | 600                     |                                                                                                         | [67]                  | Closest to <i>Coscinaeraea</i> [80]                                       |
| Siderastreidae | <i>Horastrea indica</i>           | Yes  | VU       | 4         | 14                  | 6                 | 4                       | COI: AM494864                                                                                           | [67]                  |                                                                           |
| Siderastreidae | <i>Psammocora albopicta</i>       | Yes  | DD       | N/A       | 287                 | 163               | 155                     | COI: FM865871                                                                                           | [67]                  |                                                                           |
| Siderastreidae | <i>Psammocora contigua</i>        | Yes  | NT       | N/A       | 145                 | 25                | 18                      | 16S: AF550371;<br>COI: AB441209;<br>CYB: AB441294                                                       | [67]                  |                                                                           |
| Siderastreidae | <i>Psammocora decussata</i>       | Yes  | DD       | N/A       | 431                 | 460               | 452                     |                                                                                                         | [67]                  | <i>Psammocora</i> monophyly shown [72]                                    |
| Siderastreidae | <i>Psammocora digitata</i>        | Yes  | NT       | N/A       | 203                 | 112               | 104                     | COI: AM494855                                                                                           | [67]                  |                                                                           |
| Siderastreidae | <i>Psammocora explanulata</i>     | Yes  | LC       | N/A       | 565                 | 355               | 350                     | COI: AM494845                                                                                           | [67]                  | Fungiidae clade [71]                                                      |
| Siderastreidae | <i>Psammocora haimeana</i>        | Yes  | LC       | N/A       | 488                 | 255               | 253                     | COI: FM865874                                                                                           | [67]                  |                                                                           |
| Siderastreidae | <i>Psammocora interstinctus</i>   | Yes  | DD       | N/A       | 431                 | 460               | 452                     |                                                                                                         | [67]                  | <i>Psammocora</i> monophyly shown [72]                                    |
| Siderastreidae | <i>Psammocora nierstraszi</i>     | Yes  | LC       | N/A       | 399                 | 119               | 110                     | COI: AM494851                                                                                           | [67]                  |                                                                           |
| Siderastreidae | <i>Psammocora obtusangula</i>     | Yes  | NT       | N/A       | 343                 | 382               | 374                     |                                                                                                         | [67]                  |                                                                           |
| Siderastreidae | <i>Psammocora profundacella</i>   | Yes  | LC       | N/A       | 400                 | 120               | 111                     | COI: AM494853                                                                                           | [67]                  |                                                                           |
| Siderastreidae | <i>Psammocora ramosa</i>          | Yes  | DD       | N/A       | 431                 | 460               | 452                     |                                                                                                         | [67]                  | <i>Psammocora</i> monophyly shown [72]                                    |
| Siderastreidae | <i>Psammocora stellata</i>        | Yes  | VU       | N/A       | 116                 | 204               | 197                     |                                                                                                         | [67]                  | <i>Psammocora</i> monophyly shown [72]                                    |
| Siderastreidae | <i>Psammocora superficialis</i>   | Yes  | LC       | N/A       | 717                 | 598               | 598                     |                                                                                                         | [67]                  |                                                                           |
| Siderastreidae | <i>Psammocora vaughani</i>        | Yes  | NT       | N/A       | 343                 | 382               | 374                     |                                                                                                         | [67]                  |                                                                           |



| Family          | Species                            | Reef | Red List | EoE rank | EDGE rank (IUCN100) | EDGE rank (Isaac) | EDGE rank (Pessimistic) | Molecular sources                                                                                       | Morphological sources | Remarks                                                                      |
|-----------------|------------------------------------|------|----------|----------|---------------------|-------------------|-------------------------|---------------------------------------------------------------------------------------------------------|-----------------------|------------------------------------------------------------------------------|
| Siderastreidae  | <i>Psammocora verrilli</i>         | Yes  | DD       | N/A      | 431                 | 460               | 452                     |                                                                                                         | [67]                  | <i>Psammocora</i> monophyly shown [72]                                       |
| Siderastreidae  | <i>Pseudosiderastrea tayami</i>    | Yes  | NT       | ED       | 174                 | 55                | 52                      | COI: AM494866                                                                                           | [67]                  |                                                                              |
| Siderastreidae  | <i>Siderastrea glynni</i>          | Yes  | CR       | N/A      | 4                   | 4                 | 46                      |                                                                                                         | [67]                  | <i>Siderastrea</i> monophyly shown [82]                                      |
| Siderastreidae  | <i>Siderastrea radians</i>         | Yes  | LC       | N/A      | 374                 | 75                | 70                      | 12S: DQ643838;<br>16S: DQ643838;<br>AT6: DQ643838;<br>COI: DQ643838;<br>CYB: DQ643838;<br>ND5: DQ643838 | [67]                  |                                                                              |
| Siderastreidae  | <i>Siderastrea savignyana</i>      | Yes  | LC       | N/A      | 362                 | 64                | 59                      | COI: AB441215;<br>CYB: AB441300                                                                         | [67]                  |                                                                              |
| Siderastreidae  | <i>Siderastrea siderea</i>         | Yes  | LC       | N/A      | 387                 | 91                | 85                      | 12S: EF597067;<br>COI: AB441211;<br>CYB: AB441296                                                       | [67]                  |                                                                              |
| Siderastreidae  | <i>Siderastrea stellata</i>        | Yes  | DD       | N/A      | 187                 | 38                | 33                      | COI: AB441213;<br>CYB: AB441298<br>COI: HM018619                                                        | [67,68]               |                                                                              |
| Stenocyathidae  | <i>Stenocyathus vermiformis</i>    | No   | N/A      | N/A      | N/A                 | N/A               | N/A                     |                                                                                                         |                       |                                                                              |
| Trachyphyllidae | <i>Trachyphyllia geoffroyi</i>     | Yes  | NT       | ED       | 225                 | 122               | 112                     | COI: AB117287;<br>CYB: AB117372                                                                         |                       | Clade VII-B monophyly shown [81]                                             |
| Turbinoliidae   | <i>Alatotrochus rubescens</i>      | No   | N/A      | N/A      | N/A                 | N/A               | N/A                     |                                                                                                         | [62]                  |                                                                              |
| Turbinoliidae   | <i>Australocyathus vincentinus</i> | No   | N/A      | N/A      | N/A                 | N/A               | N/A                     |                                                                                                         | [62]                  |                                                                              |
| Turbinoliidae   | <i>Conocyathus formosus</i>        | No   | N/A      | N/A      | N/A                 | N/A               | N/A                     |                                                                                                         | [62]                  |                                                                              |
| Turbinoliidae   | <i>Conocyathus gracilis</i>        | No   | N/A      | N/A      | N/A                 | N/A               | N/A                     |                                                                                                         | [62]                  |                                                                              |
| Turbinoliidae   | <i>Conocyathus zelandiae</i>       | No   | N/A      | N/A      | N/A                 | N/A               | N/A                     |                                                                                                         | [62]                  |                                                                              |
| Turbinoliidae   | <i>Cryptotrochus brevipalus</i>    | No   | N/A      | N/A      | N/A                 | N/A               | N/A                     |                                                                                                         | [62]                  |                                                                              |
| Turbinoliidae   | <i>Cryptotrochus carolinensis</i>  | No   | N/A      | N/A      | N/A                 | N/A               | N/A                     |                                                                                                         | [62]                  |                                                                              |
| Turbinoliidae   | <i>Cryptotrochus javanus</i>       | No   | N/A      | N/A      | N/A                 | N/A               | N/A                     |                                                                                                         | [62]                  |                                                                              |
| Turbinoliidae   | <i>Cyathotrochus herdmani</i>      | No   | N/A      | N/A      | N/A                 | N/A               | N/A                     |                                                                                                         | [62]                  |                                                                              |
| Turbinoliidae   | <i>Cyathotrochus nascomatus</i>    | No   | N/A      | N/A      | N/A                 | N/A               | N/A                     |                                                                                                         | [62]                  |                                                                              |
| Turbinoliidae   | <i>Cyathotrochus pileus</i>        | No   | N/A      | N/A      | N/A                 | N/A               | N/A                     | 12S: EF597069;<br>COI: HM018623                                                                         | [62]                  |                                                                              |
| Turbinoliidae   | <i>Deltocyathoides orientalis</i>  | No   | N/A      | N/A      | N/A                 | N/A               | N/A                     |                                                                                                         | [62]                  |                                                                              |
| Turbinoliidae   | <i>Deltocyathoides stimpsonii</i>  | No   | N/A      | N/A      | N/A                 | N/A               | N/A                     |                                                                                                         | [62]                  |                                                                              |
| Turbinoliidae   | <i>Dunocyathus parasiticus</i>     | No   | N/A      | N/A      | N/A                 | N/A               | N/A                     |                                                                                                         | [62]                  |                                                                              |
| Turbinoliidae   | <i>Dunocyathus wallaceae</i>       | No   | N/A      | N/A      | N/A                 | N/A               | N/A                     |                                                                                                         | [62]                  |                                                                              |
| Turbinoliidae   | <i>Endocyathopora laticostata</i>  | No   | N/A      | N/A      | N/A                 | N/A               | N/A                     |                                                                                                         | [62]                  |                                                                              |
| Turbinoliidae   | <i>Foveolocyathus alternans</i>    | No   | N/A      | N/A      | N/A                 | N/A               | N/A                     |                                                                                                         | [62]                  |                                                                              |
| Turbinoliidae   | <i>Foveolocyathus kitsoni</i>      | No   | N/A      | N/A      | N/A                 | N/A               | N/A                     |                                                                                                         | [62]                  |                                                                              |
| Turbinoliidae   | <i>Foveolocyathus parkeri</i>      | No   | N/A      | N/A      | N/A                 | N/A               | N/A                     |                                                                                                         | [62]                  |                                                                              |
| Turbinoliidae   | <i>Foveolocyathus verconis</i>     | No   | N/A      | N/A      | N/A                 | N/A               | N/A                     |                                                                                                         | [62]                  |                                                                              |
| Turbinoliidae   | <i>Holcotrochus crenulatus</i>     | No   | N/A      | N/A      | N/A                 | N/A               | N/A                     |                                                                                                         | [62]                  |                                                                              |
| Turbinoliidae   | <i>Holcotrochus scriptus</i>       | No   | N/A      | N/A      | N/A                 | N/A               | N/A                     |                                                                                                         | [62]                  |                                                                              |
| Turbinoliidae   | <i>Idiotrochus alatus</i>          | No   | N/A      | N/A      | N/A                 | N/A               | N/A                     |                                                                                                         | [62]                  |                                                                              |
| Turbinoliidae   | <i>Idiotrochus emarciatus</i>      | No   | N/A      | N/A      | N/A                 | N/A               | N/A                     |                                                                                                         | [62]                  |                                                                              |
| Turbinoliidae   | <i>Idiotrochus kikutii</i>         | No   | N/A      | N/A      | N/A                 | N/A               | N/A                     |                                                                                                         | [62]                  |                                                                              |
| Turbinoliidae   | <i>Kionotrochus suteri</i>         | No   | N/A      | N/A      | N/A                 | N/A               | N/A                     |                                                                                                         | [62]                  |                                                                              |
| Turbinoliidae   | <i>Notocyathus conicus</i>         | No   | N/A      | N/A      | N/A                 | N/A               | N/A                     | 12S: EF597061;<br>16S: AF265584                                                                         | [62]                  | <i>Notocyathus</i> sp. in GenBank; ancestral branch shared with conspecifics |
| Turbinoliidae   | <i>Notocyathus venustus</i>        | No   | N/A      | N/A      | N/A                 | N/A               | N/A                     |                                                                                                         | [62]                  |                                                                              |
| Turbinoliidae   | <i>Peponocyathus dawsoni</i>       | No   | N/A      | N/A      | N/A                 | N/A               | N/A                     |                                                                                                         | [62]                  |                                                                              |
| Turbinoliidae   | <i>Peponocyathus folliculus</i>    | No   | N/A      | N/A      | N/A                 | N/A               | N/A                     |                                                                                                         | [62]                  |                                                                              |
| Turbinoliidae   | <i>Peponocyathus minimus</i>       | No   | N/A      | N/A      | N/A                 | N/A               | N/A                     |                                                                                                         | [62]                  |                                                                              |
| Turbinoliidae   | <i>Platyrochus compressus</i>      | No   | N/A      | N/A      | N/A                 | N/A               | N/A                     |                                                                                                         | [62]                  |                                                                              |
| Turbinoliidae   | <i>Platyrochus hastatus</i>        | No   | N/A      | N/A      | N/A                 | N/A               | N/A                     |                                                                                                         | [62]                  |                                                                              |
| Turbinoliidae   | <i>Platyrochus laevigatus</i>      | No   | N/A      | N/A      | N/A                 | N/A               | N/A                     |                                                                                                         | [62]                  |                                                                              |
| Turbinoliidae   | <i>Platyrochus parisepta</i>       | No   | N/A      | N/A      | N/A                 | N/A               | N/A                     |                                                                                                         | [62]                  |                                                                              |
| Turbinoliidae   | <i>Pleotrochus venustus</i>        | No   | N/A      | N/A      | N/A                 | N/A               | N/A                     |                                                                                                         | [62]                  |                                                                              |
| Turbinoliidae   | <i>Pleotrochus zibrowii</i>        | No   | N/A      | N/A      | N/A                 | N/A               | N/A                     |                                                                                                         | [62]                  |                                                                              |
| Turbinoliidae   | <i>Pseudocyathoceras avis</i>      | No   | DD       | N/A      | N/A                 | N/A               | N/A                     |                                                                                                         | [62]                  |                                                                              |

| Family                    | Species                                | Reef | Red | EoE  | EDGE rank | EDGE rank | EDGE rank     | Molecular                                                                                               | Morphological | Remarks |
|---------------------------|----------------------------------------|------|-----|------|-----------|-----------|---------------|---------------------------------------------------------------------------------------------------------|---------------|---------|
|                           |                                        | List |     | rank | (IUCN100) | (Isaac)   | (Pessimistic) | sources                                                                                                 | sources       |         |
| Turbinoliidae             | <i>Sphenotrochus andrewianus</i>       | No   | N/A | N/A  | N/A       | N/A       | N/A           |                                                                                                         |               | [62]    |
| Turbinoliidae             | <i>Sphenotrochus aurantiacus</i>       | No   | N/A | N/A  | N/A       | N/A       | N/A           |                                                                                                         |               | [62]    |
| Turbinoliidae             | <i>Sphenotrochus auritus</i>           | No   | N/A | N/A  | N/A       | N/A       | N/A           |                                                                                                         |               | [62]    |
| Turbinoliidae             | <i>Sphenotrochus cuneolus</i>          | No   | N/A | N/A  | N/A       | N/A       | N/A           |                                                                                                         |               | [62]    |
| Turbinoliidae             | <i>Sphenotrochus evexicostatus</i>     | No   | N/A | N/A  | N/A       | N/A       | N/A           |                                                                                                         |               | [62]    |
| Turbinoliidae             | <i>Sphenotrochus excavatus</i>         | No   | N/A | N/A  | N/A       | N/A       | N/A           |                                                                                                         |               | [62]    |
| Turbinoliidae             | <i>Sphenotrochus gardineri</i>         | No   | N/A | N/A  | N/A       | N/A       | N/A           |                                                                                                         |               | [62]    |
| Turbinoliidae             | <i>Sphenotrochus gilchristi</i>        | No   | N/A | N/A  | N/A       | N/A       | N/A           |                                                                                                         |               | [62]    |
| Turbinoliidae             | <i>Sphenotrochus hancocki</i>          | No   | N/A | N/A  | N/A       | N/A       | N/A           |                                                                                                         |               | [62]    |
| Turbinoliidae             | <i>Sphenotrochus imbricatocostatus</i> | No   | N/A | N/A  | N/A       | N/A       | N/A           |                                                                                                         |               | [62]    |
| Turbinoliidae             | <i>Sphenotrochus lindstroemi</i>       | No   | N/A | N/A  | N/A       | N/A       | N/A           |                                                                                                         |               | [62]    |
| Turbinoliidae             | <i>Sphenotrochus ralphae</i>           | No   | N/A | N/A  | N/A       | N/A       | N/A           |                                                                                                         |               | [62]    |
| Turbinoliidae             | <i>Sphenotrochus squiresei</i>         | No   | N/A | N/A  | N/A       | N/A       | N/A           |                                                                                                         |               | [62]    |
| Turbinoliidae             | <i>Thrypticotrochus petterdi</i>       | No   | N/A | N/A  | N/A       | N/A       | N/A           |                                                                                                         |               | [62]    |
| Turbinoliidae             | <i>Trematotrochus corbicula</i>        | No   | N/A | N/A  | N/A       | N/A       | N/A           |                                                                                                         |               | [62]    |
| Turbinoliidae             | <i>Trematotrochus hedleyi</i>          | No   | N/A | N/A  | N/A       | N/A       | N/A           |                                                                                                         |               | [62]    |
| Turbinoliidae             | <i>Tropidocyathus labidus</i>          | No   | N/A | N/A  | N/A       | N/A       | N/A           | 12S: EF597062;<br>16S: AF265585<br>COI: HM018669                                                        |               | [62]    |
| Turbinoliidae             | <i>Tropidocyathus lessoni</i>          | No   | N/A | N/A  | N/A       | N/A       | N/A           |                                                                                                         |               | [62]    |
| Turbinoliidae             | <i>Turbinolia stephensoni</i>          | No   | N/A | N/A  | N/A       | N/A       | N/A           |                                                                                                         |               | [62]    |
| Discosomatidae (outgroup) | <i>Discosoma</i>                       | N/A  | N/A | N/A  | N/A       | N/A       | N/A           | 12S: DQ643965;<br>16S: DQ643965;<br>AT6: DQ643965;<br>COI: DQ643965;<br>CYB: DQ643965;<br>ND5: DQ643965 |               | [68]    |
| Ricordeidae (outgroup)    | <i>Ricordea florida</i>                | N/A  | N/A | N/A  | N/A       | N/A       | N/A           | 12S: DQ640648;<br>16S: DQ640648;<br>AT6: DQ640648;<br>COI: DQ640648;<br>CYB: DQ640648;<br>ND5: DQ640648 |               | [68]    |
